# Supplementary material
Source: PubMed Central journal article supplement (PMC1482648)
Supplement: pnas_0601137103_7.pdf [file pnas_0601137103_7.pdf]

**Table 2. Respiratory rates of marine planktonic organisms**

|    | Group         | Ref | Species                          | Temp  | Carbon   | Vol      | Resp     | PAR   |
|----|---------------|-----|----------------------------------|-------|----------|----------|----------|-------|
| 1  | Phytoplankton | (1) | <i>Dunaliella tertiolecta</i>    | 21.00 | 3.94E+01 | 2.55E+02 | 1.53E−09 | 9.71  |
| 2  | Phytoplankton | (1) | <i>Dunaliella tertiolecta</i>    | 21.00 | 4.64E+01 | 3.04E+02 | 7.90E−10 | 9.71  |
| 3  | Phytoplankton | (1) | <i>Dunaliella tertiolecta</i>    | 21.00 | 4.29E+01 | 2.80E+02 | 6.56E−10 | 9.71  |
| 4  | Phytoplankton | (1) | <i>Dunaliella tertiolecta</i>    | 21.00 | 4.29E+01 | 2.80E+02 | 1.08E−09 | 9.71  |
| 5  | Phytoplankton | (1) | <i>Skeletonema costatum</i>      | 21.00 | 2.17E+01 | 2.07E+02 | 9.14E−10 | 9.71  |
| 6  | Phytoplankton | (1) | <i>Skeletonema costatum</i>      | 21.00 | 1.64E+01 | 1.46E+02 | 5.84E−10 | 9.71  |
| 7  | Phytoplankton | (1) | <i>Skeletonema costatum</i>      | 21.00 | 3.35E+01 | 3.53E+02 | 7.71E−10 | 9.71  |
| 8  | Phytoplankton | (1) | <i>Skeletonema costatum</i>      | 21.00 | 3.25E+01 | 3.40E+02 | 1.21E−09 | 9.71  |
| 9  | Phytoplankton | (1) | <i>Ditylum brightwellii</i>      | 21.00 | 8.14E+02 | 1.80E+04 | 1.70E−08 | 9.71  |
| 10 | Phytoplankton | (1) | <i>Ditylum brightwellii</i>      | 21.00 | 9.10E+02 | 2.07E+04 | 1.67E−08 | 9.71  |
| 11 | Phytoplankton | (1) | <i>Thalassiosira rotula</i>      | 21.00 | 2.89E+02 | 5.04E+03 | 7.41E−09 | 9.71  |
| 12 | Phytoplankton | (1) | <i>Thalassiosira pseudonana</i>  | 21.00 | 4.08E+01 | 4.50E+02 | 6.69E−10 | 9.71  |
| 13 | Phytoplankton | (1) | <i>Scrippsiella trochoidea</i>   | 21.00 | 1.28E+03 | 1.04E+04 | 2.50E−08 | 9.71  |
| 14 | Phytoplankton | (1) | <i>Emiliania huxleyi</i>         | 21.00 | 4.29E+00 | 2.41E+01 | 1.46E−10 | 9.71  |
| 15 | Phytoplankton | (1) | <i>Syracosphaera elongata</i>    | 21.00 | 2.69E+02 | 1.98E+03 | 1.06E−08 | 9.71  |
| 16 | Phytoplankton | (2) | <i>Prorocentrum micans</i>       | 18.00 | 1.07E+03 | 4.34E+03 | 1.01E−08 | 6.05  |
| 17 | Phytoplankton | (2) | <i>Prorocentrum micans</i>       | 18.00 | 1.10E+03 | 5.10E+03 | 1.22E−08 | 12.96 |
| 18 | Phytoplankton | (2) | <i>Prorocentrum micans</i>       | 18.00 | 1.12E+03 | 5.12E+03 | 1.80E−08 | 27.65 |
| 19 | Phytoplankton | (2) | <i>Prorocentrum micans</i>       | 18.00 | 1.18E+03 | 5.35E+03 | 2.16E−08 | 51.84 |
| 20 | Phytoplankton | (2) | <i>Isochrysis galbana</i>        | 18.00 | 1.03E+01 | 3.70E+01 | 1.58E−10 | 2.59  |
| 21 | Phytoplankton | (2) | <i>Isochrysis galbana</i>        | 18.00 | 1.24E+01 | 5.00E+01 | 1.87E−10 | 6.05  |
| 22 | Phytoplankton | (2) | <i>Isochrysis galbana</i>        | 18.00 | 1.50E+01 | 5.50E+01 | 2.88E−10 | 12.96 |
| 23 | Phytoplankton | (2) | <i>Isochrysis galbana</i>        | 18.00 | 1.65E+01 | 5.20E+01 | 3.17E−10 | 27.65 |
| 24 | Phytoplankton | (2) | <i>Isochrysis galbana</i>        | 18.00 | 2.00E+01 | 5.70E+01 | 3.31E−10 | 51.84 |
| 25 | Phytoplankton | (2) | <i>Thalassiosira weisflogii</i>  | 18.00 | 2.75E+02 | 1.17E+03 | 2.88E−09 | 2.59  |
| 26 | Phytoplankton | (2) | <i>Thalassiosira weisflogii</i>  | 18.00 | 2.77E+02 | 1.46E+03 | 6.77E−09 | 6.05  |
| 27 | Phytoplankton | (2) | <i>Thalassiosira weisflogii</i>  | 18.00 | 2.91E+02 | 1.68E+03 | 1.04E−08 | 12.96 |
| 28 | Phytoplankton | (2) | <i>Thalassiosira weisflogii</i>  | 18.00 | 3.28E+02 | 1.36E+03 | 1.08E−08 | 27.65 |
| 29 | Phytoplankton | (2) | <i>Thalassiosira weisflogii</i>  | 18.00 | 3.26E+02 | 1.48E+03 | 1.18E−08 | 51.84 |
| 30 | Phytoplankton | (3) | <i>Gyrodinium cf. aureolum</i>   | 20.00 | 6.05E+02 | 3.62E+03 | 1.80E−08 | 1.51  |
| 31 | Phytoplankton | (3) | <i>Gyrodinium cf. aureolum</i>   | 20.00 | 6.82E+02 | 5.56E+03 | 2.04E−08 | 3.46  |
| 32 | Phytoplankton | (3) | <i>Gyrodinium cf. aureolum</i>   | 20.00 | 6.89E+02 | 5.93E+03 | 2.23E−08 | 5.18  |
| 33 | Phytoplankton | (3) | <i>Gyrodinium cf. aureolum</i>   | 20.00 | 1.34E+03 | 6.57E+03 | 2.28E−08 | 10.15 |
| 34 | Phytoplankton | (3) | <i>Gyrodinium cf. aureolum</i>   | 20.00 | 1.38E+03 | 6.11E+03 | 2.21E−08 | 16.42 |
| 35 | Phytoplankton | (4) | <i>Phaeodactylum tricornutum</i> | 23.00 | 8.10E+00 | 6.13E+01 | 1.38E−10 | 0.60  |

|    |               |     |                                  |       |          |          |          |       |
|----|---------------|-----|----------------------------------|-------|----------|----------|----------|-------|
| 36 | Phytoplankton | (4) | <i>Phaeodactylum tricornutum</i> | 23.00 | 8.00E+00 | 6.03E+01 | 1.90E-10 | 0.60  |
| 37 | Phytoplankton | (4) | <i>Phaeodactylum tricornutum</i> | 23.00 | 1.23E+01 | 1.03E+02 | 4.41E-10 | 1.21  |
| 38 | Phytoplankton | (4) | <i>Phaeodactylum tricornutum</i> | 23.00 | 8.30E+00 | 6.31E+01 | 2.16E-10 | 2.59  |
| 39 | Phytoplankton | (4) | <i>Phaeodactylum tricornutum</i> | 23.00 | 1.03E+01 | 8.24E+01 | 1.81E-10 | 5.18  |
| 40 | Phytoplankton | (4) | <i>Phaeodactylum tricornutum</i> | 23.00 | 1.24E+01 | 1.04E+02 | 3.37E-10 | 11.23 |
| 41 | Phytoplankton | (4) | <i>Phaeodactylum tricornutum</i> | 23.00 | 1.24E+01 | 1.04E+02 | 2.33E-10 | 17.28 |
| 42 | Phytoplankton | (4) | <i>Phaeodactylum tricornutum</i> | 23.00 | 1.06E+01 | 8.54E+01 | 2.42E-10 | 19.87 |
| 43 | Phytoplankton | (4) | <i>Phaeodactylum tricornutum</i> | 23.00 | 1.07E+01 | 8.64E+01 | 2.59E-10 | 19.87 |
| 44 | Phytoplankton | (5) | <i>Isochrysis galbana</i>        | 18.00 | 1.04E+01 | 3.42E+01 | 1.73E-10 | 15.12 |
| 45 | Phytoplankton | (5) | <i>Isochrysis galbana</i>        | 18.00 | 1.08E+01 | 3.38E+01 | 1.61E-10 | 15.12 |
| 46 | Phytoplankton | (5) | <i>Isochrysis galbana</i>        | 18.00 | 1.27E+01 | 3.33E+01 | 1.58E-10 | 15.12 |
| 47 | Phytoplankton | (5) | <i>Isochrysis galbana</i>        | 18.00 | 1.37E+01 | 3.29E+01 | 1.37E-10 | 15.12 |
| 48 | Phytoplankton | (5) | <i>Isochrysis galbana</i>        | 18.00 | 1.41E+01 | 3.25E+01 | 1.41E-10 | 15.12 |
| 49 | Phytoplankton | (5) | <i>Isochrysis galbana</i>        | 18.00 | 1.44E+01 | 3.20E+01 | 1.44E-10 | 15.12 |
| 50 | Phytoplankton | (5) | <i>Isochrysis galbana</i>        | 18.00 | 1.64E+01 | 3.16E+01 | 1.37E-10 | 15.12 |
| 51 | Phytoplankton | (5) | <i>Isochrysis galbana</i>        | 18.00 | 1.77E+01 | 3.11E+01 | 1.32E-10 | 15.12 |
| 52 | Phytoplankton | (5) | <i>Isochrysis galbana</i>        | 18.00 | 1.77E+01 | 3.07E+01 | 1.32E-10 | 15.12 |
| 53 | Phytoplankton | (6) | <i>Skeletonema costatum</i>      | 15.00 | 1.60E+01 | 6.50E+01 | 4.22E-11 | 0.25  |
| 54 | Phytoplankton | (6) | <i>Skeletonema costatum</i>      | 15.00 | 1.50E+01 | 1.19E+02 | 2.16E-10 | 0.76  |
| 55 | Phytoplankton | (6) | <i>Skeletonema costatum</i>      | 15.00 | 1.60E+01 | 1.19E+02 | 3.23E-10 | 2.87  |
| 56 | Phytoplankton | (6) | <i>Skeletonema costatum</i>      | 15.00 | 1.40E+01 | 1.19E+02 | 2.69E-10 | 3.33  |
| 57 | Phytoplankton | (6) | <i>Skeletonema costatum</i>      | 15.00 | 2.20E+01 | 1.24E+02 | 6.34E-10 | 5.54  |
| 58 | Phytoplankton | (6) | <i>Skeletonema costatum</i>      | 15.00 | 1.60E+01 | 1.24E+02 | 3.46E-10 | 5.75  |
| 59 | Phytoplankton | (6) | <i>Skeletonema costatum</i>      | 15.00 | 2.90E+01 | 1.19E+02 | 8.35E-10 | 9.58  |
| 60 | Phytoplankton | (6) | <i>Skeletonema costatum</i>      | 15.00 | 3.10E+01 | 1.19E+02 | 6.18E-10 | 17.14 |
| 61 | Phytoplankton | (6) | <i>Skeletonema costatum</i>      | 15.00 | 3.00E+01 | 1.61E+02 | 7.56E-10 | 22.68 |
| 62 | Phytoplankton | (6) | <i>Olisthodiscus luteus</i>      | 15.00 | 1.68E+02 | 8.33E+02 | 1.90E-09 | 0.81  |
| 63 | Phytoplankton | (6) | <i>Olisthodiscus luteus</i>      | 15.00 | 1.83E+02 | 9.45E+02 | 1.67E-09 | 1.61  |
| 64 | Phytoplankton | (6) | <i>Olisthodiscus luteus</i>      | 15.00 | 2.04E+02 | 1.02E+03 | 1.27E-09 | 2.92  |
| 65 | Phytoplankton | (6) | <i>Olisthodiscus luteus</i>      | 15.00 | 2.07E+02 | 9.05E+02 | 1.69E-09 | 5.90  |
| 66 | Phytoplankton | (6) | <i>Olisthodiscus luteus</i>      | 15.00 | 2.99E+02 | 1.12E+03 | 4.02E-09 | 9.83  |
| 67 | Phytoplankton | (6) | <i>Olisthodiscus luteus</i>      | 15.00 | 3.14E+02 | 1.15E+03 | 5.28E-09 | 20.51 |
| 68 | Phytoplankton | (6) | <i>Gonyaulax tamarensis</i>      | 15.00 | 2.54E+03 | 1.30E+04 | 6.89E-08 | 1.61  |
| 69 | Phytoplankton | (6) | <i>Gonyaulax tamarensis</i>      | 15.00 | 2.78E+03 | 1.33E+04 | 8.13E-08 | 2.92  |
| 70 | Phytoplankton | (6) | <i>Gonyaulax tamarensis</i>      | 15.00 | 3.08E+03 | 1.41E+04 | 6.06E-08 | 5.90  |
| 71 | Phytoplankton | (6) | <i>Gonyaulax tamarensis</i>      | 15.00 | 4.19E+03 | 1.52E+04 | 6.44E-08 | 10.03 |
| 72 | Phytoplankton | (6) | <i>Gonyaulax tamarensis</i>      | 15.00 | 1.96E+03 | 1.07E+04 | 7.42E-08 | 15.88 |
| 73 | Phytoplankton | (6) | <i>Gonyaulax tamarensis</i>      | 15.00 | 4.04E+03 | 1.62E+04 | 1.47E-07 | 20.51 |

|     |               |     |                                            |       |          |          |          |       |
|-----|---------------|-----|--------------------------------------------|-------|----------|----------|----------|-------|
| 74  | Phytoplankton | (7) | <i>Thalassiosira allenii</i> - small cells | 20.00 | 3.76E+01 | 4.07E+02 | 6.49E-10 | 11.66 |
| 75  | Phytoplankton | (7) | <i>Thalassiosira allenii</i> - small cells | 20.00 | 2.88E+01 | 2.93E+02 | 7.85E-10 | 11.66 |
| 76  | Phytoplankton | (7) | <i>Thalassiosira allenii</i> - small cells | 20.00 | 2.28E+01 | 2.20E+02 | 1.10E-09 | 11.66 |
| 77  | Phytoplankton | (7) | <i>Thalassiosira allenii</i> - small cells | 20.00 | 1.91E+01 | 1.76E+02 | 1.18E-09 | 11.66 |
| 78  | Phytoplankton | (7) | <i>Thalassiosira allenii</i> - large cells | 20.00 | 6.69E+01 | 8.28E+02 | 3.85E-10 | 11.66 |
| 79  | Phytoplankton | (7) | <i>Thalassiosira allenii</i> - large cells | 20.00 | 6.97E+01 | 8.71E+02 | 7.49E-10 | 11.66 |
| 80  | Phytoplankton | (7) | <i>Thalassiosira allenii</i> - large cells | 20.00 | 6.98E+01 | 8.72E+02 | 1.20E-09 | 11.66 |
| 81  | Phytoplankton | (7) | <i>Thalassiosira allenii</i> - large cells | 20.00 | 6.07E+01 | 7.34E+02 | 1.44E-09 | 11.66 |
| 82  | Phytoplankton | (7) | <i>Thalassiosira allenii</i> - large cells | 20.00 | 4.77E+01 | 5.45E+02 | 2.09E-09 | 11.66 |
| 83  | Phytoplankton | (7) | <i>Monochrysis lutheri</i>                 | 20.00 | 1.31E+01 | 7.91E+01 | 2.06E-10 | 11.66 |
| 84  | Phytoplankton | (7) | <i>Monochrysis lutheri</i>                 | 20.00 | 9.30E+00 | 5.49E+01 | 2.19E-10 | 11.66 |
| 85  | Phytoplankton | (7) | <i>Monochrysis lutheri</i>                 | 20.00 | 8.90E+00 | 5.24E+01 | 2.80E-10 | 11.66 |
| 86  | Phytoplankton | (7) | <i>Monochrysis lutheri</i>                 | 20.00 | 1.01E+01 | 6.00E+01 | 3.46E-10 | 11.66 |
| 87  | Phytoplankton | (7) | <i>Monochrysis lutheri</i>                 | 20.00 | 9.40E+00 | 5.55E+01 | 2.35E-10 | 11.66 |
| 88  | Phytoplankton | (7) | <i>Monochrysis lutheri</i>                 | 20.00 | 1.12E+01 | 6.69E+01 | 2.57E-10 | 11.66 |
| 89  | Phytoplankton | (7) | <i>Dunaliella tertiolecta</i>              | 20.00 | 3.06E+01 | 1.95E+02 | 3.82E-10 | 11.66 |
| 90  | Phytoplankton | (7) | <i>Dunaliella tertiolecta</i>              | 20.00 | 2.66E+01 | 1.68E+02 | 4.59E-10 | 11.66 |
| 91  | Phytoplankton | (7) | <i>Dunaliella tertiolecta</i>              | 20.00 | 2.43E+01 | 1.53E+02 | 7.96E-10 | 11.66 |
| 92  | Phytoplankton | (7) | <i>Dunaliella tertiolecta</i>              | 20.00 | 2.18E+01 | 1.36E+02 | 8.94E-10 | 11.66 |
| 93  | Phytoplankton | (7) | <i>Dunaliella tertiolecta</i>              | 20.00 | 1.97E+01 | 1.22E+02 | 9.60E-10 | 11.66 |
| 94  | Phytoplankton | (7) | <i>Dunaliella tertiolecta</i>              | 20.00 | 2.31E+01 | 1.45E+02 | 1.07E-09 | 11.66 |
| 95  | Phytoplankton | (7) | <i>Dunaliella tertiolecta</i>              | 20.00 | 3.41E+01 | 2.19E+02 | 1.07E-09 | 11.66 |
| 96  | Phytoplankton | (8) | <i>Porphyridium purpureum</i>              | 18.00 | 2.92E+01 | 1.86E+02 | 1.15E-09 | 86.40 |
| 97  | Phytoplankton | (8) | <i>Porphyridium purpureum</i>              | 18.00 | 3.02E+01 | 1.92E+02 | 1.92E-09 | 86.40 |
| 98  | Phytoplankton | (8) | <i>Porphyridium purpureum</i>              | 18.00 | 2.92E+01 | 1.86E+02 | 2.24E-09 | 86.40 |
| 99  | Phytoplankton | (8) | <i>Porphyridium purpureum</i>              | 18.00 | 2.82E+01 | 1.79E+02 | 2.20E-09 | 86.40 |
| 100 | Phytoplankton | (8) | <i>Porphyridium purpureum</i>              | 18.00 | 2.72E+01 | 1.72E+02 | 2.91E-09 | 86.40 |
| 101 | Phytoplankton | (8) | <i>Porphyridium purpureum</i>              | 18.00 | 2.61E+01 | 1.65E+02 | 2.59E-09 | 86.40 |
| 102 | Phytoplankton | (8) | <i>Porphyridium purpureum</i>              | 18.00 | 2.51E+01 | 1.58E+02 | 2.19E-09 | 86.40 |
| 103 | Phytoplankton | (9) | <i>Isochrysis galbana</i>                  | 21.00 | 1.91E+00 | 4.00E+01 | 1.82E-10 | 2.16  |
| 104 | Phytoplankton | (9) | <i>Isochrysis galbana</i>                  | 21.00 | 1.91E+00 | 4.00E+01 | 2.68E-10 | 21.60 |
| 105 | Phytoplankton | (9) | <i>Isochrysis galbana</i>                  | 21.00 | 1.33E+00 | 3.20E+01 | 3.11E-10 | 2.16  |
| 106 | Phytoplankton | (9) | <i>Isochrysis galbana</i>                  | 21.00 | 1.33E+00 | 3.20E+01 | 7.18E-10 | 21.60 |
| 107 | Phytoplankton | (9) | <i>Thalassiosira pseudonana</i>            | 21.00 | 5.65E+00 | 6.00E+01 | 5.25E-10 | 2.16  |
| 108 | Phytoplankton | (9) | <i>Thalassiosira pseudonana</i>            | 21.00 | 6.69E+00 | 5.00E+01 | 8.36E-10 | 2.16  |
| 109 | Phytoplankton | (9) | <i>Thalassiosira pseudonana</i>            | 21.00 | 6.69E+00 | 5.00E+01 | 1.45E-09 | 21.60 |
| 110 | Phytoplankton | (9) | <i>Chaetoceros</i> sp.                     | 21.00 | 1.76E+00 | 3.70E+01 | 2.04E-10 | 2.16  |
| 111 | Phytoplankton | (9) | <i>Chaetoceros</i> sp.                     | 21.00 | 5.80E-01 | 2.10E+01 | 2.46E-10 | 2.16  |

|     |               |      |                                         |       |          |          |          |       |
|-----|---------------|------|-----------------------------------------|-------|----------|----------|----------|-------|
| 112 | Phytoplankton | (9)  | <i>Tetraselmis</i> sp.                  | 21.00 | 2.02E+01 | 4.45E+02 | 7.29E-10 | 2.16  |
| 113 | Phytoplankton | (9)  | <i>Tetraselmis</i> sp.                  | 21.00 | 1.49E+01 | 2.82E+02 | 1.20E-09 | 2.16  |
| 114 | Phytoplankton | (10) | <i>Gyrodinium</i> cf. <i>aureolum</i>   | 20.00 | 1.38E+03 | 1.13E+04 | 2.21E-08 | 16.42 |
| 115 | Phytoplankton | (10) | <i>Gyrodinium</i> cf. <i>aureolum</i>   | 20.00 | 1.34E+03 | 1.09E+04 | 2.28E-08 | 10.15 |
| 116 | Phytoplankton | (10) | <i>Gyrodinium</i> cf. <i>aureolum</i>   | 20.00 | 6.90E+02 | 5.39E+03 | 2.23E-08 | 5.18  |
| 117 | Phytoplankton | (10) | <i>Gyrodinium</i> cf. <i>aureolum</i>   | 20.00 | 6.82E+02 | 5.32E+03 | 2.04E-08 | 3.46  |
| 118 | Phytoplankton | (10) | <i>Gyrodinium</i> cf. <i>aureolum</i>   | 20.00 | 6.05E+02 | 4.68E+03 | 1.80E-08 | 1.51  |
| 119 | Phytoplankton | (10) | <i>Brachiomonas</i> sp.                 | 20.00 | 2.23E+02 | 1.62E+03 | 9.84E-09 | 36.29 |
| 120 | Phytoplankton | (10) | <i>Brachiomonas</i> sp.                 | 20.00 | 2.69E+02 | 1.98E+03 | 9.36E-09 | 20.30 |
| 121 | Phytoplankton | (10) | <i>Brachiomonas</i> sp.                 | 20.00 | 2.80E+02 | 2.06E+03 | 8.16E-09 | 10.37 |
| 122 | Phytoplankton | (10) | <i>Brachiomonas</i> sp.                 | 20.00 | 2.56E+02 | 1.87E+03 | 3.24E-09 | 6.91  |
| 123 | Phytoplankton | (10) | <i>Brachiomonas</i> sp.                 | 20.00 | 2.42E+02 | 1.77E+03 | 2.28E-09 | 2.59  |
| 124 | Phytoplankton | (10) | <i>Pycnococcus</i> <i>provasolii</i>    | 20.00 | 3.30E+00 | 1.82E+01 | 1.01E-10 | 31.97 |
| 125 | Phytoplankton | (10) | <i>Pycnococcus</i> <i>provasolii</i>    | 20.00 | 3.00E+00 | 1.65E+01 | 7.68E-11 | 22.46 |
| 126 | Phytoplankton | (10) | <i>Pycnococcus</i> <i>provasolii</i>    | 20.00 | 3.60E+00 | 2.00E+01 | 1.18E-10 | 12.10 |
| 127 | Phytoplankton | (10) | <i>Pycnococcus</i> <i>provasolii</i>    | 20.00 | 3.70E+00 | 2.06E+01 | 9.12E-11 | 5.62  |
| 128 | Phytoplankton | (10) | <i>Pycnococcus</i> <i>provasolii</i>    | 20.00 | 2.90E+00 | 1.59E+01 | 4.32E-11 | 2.16  |
| 129 | Phytoplankton | (10) | <i>Synechococcus</i> sp.                | 22.00 | 2.50E-01 | 1.40E-01 | 1.20E-11 | 9.50  |
| 130 | Phytoplankton | (10) | <i>Synechococcus</i> sp.                | 22.00 | 2.50E-01 | 1.40E-01 | 1.20E-11 | 7.34  |
| 131 | Phytoplankton | (10) | <i>Synechococcus</i> sp.                | 22.00 | 2.50E-01 | 1.40E-01 | 7.20E-12 | 4.75  |
| 132 | Phytoplankton | (10) | <i>Synechococcus</i> sp.                | 22.00 | 2.50E-01 | 1.40E-01 | 4.80E-12 | 2.42  |
| 133 | Phytoplankton | (10) | <i>Phaeocystis</i> sp.                  | 15.00 | 1.42E+01 | 8.62E+01 | 1.82E-10 | 16.63 |
| 134 | Phytoplankton | (10) | <i>Phaeocystis</i> sp.                  | 15.00 | 1.42E+01 | 8.62E+01 | 4.42E-10 | 15.55 |
| 135 | Phytoplankton | (10) | <i>Phaeocystis</i> sp.                  | 15.00 | 1.42E+01 | 8.62E+01 | 9.05E-10 | 9.72  |
| 136 | Phytoplankton | (10) | <i>Phaeocystis</i> sp.                  | 15.00 | 1.42E+01 | 8.62E+01 | 5.50E-10 | 4.19  |
| 137 | Phytoplankton | (10) | <i>Phaeocystis</i> sp.                  | 15.00 | 1.42E+01 | 8.62E+01 | 1.02E-09 | 0.86  |
| 138 | Phytoplankton | (11) | <i>Phaeodactylum</i> <i>tricornutum</i> | 15.00 | 1.01E+01 | 8.00E+01 | 8.10E-11 | 2.23  |
| 139 | Phytoplankton | (11) | <i>Phaeodactylum</i> <i>tricornutum</i> | 15.00 | 1.01E+01 | 8.00E+01 | 7.74E-10 | 6.22  |
| 140 | Phytoplankton | (11) | <i>Phaeodactylum</i> <i>tricornutum</i> | 15.00 | 1.01E+01 | 8.00E+01 | 1.36E-09 | 10.05 |
| 141 | Phytoplankton | (11) | <i>Phaeodactylum</i> <i>tricornutum</i> | 15.00 | 1.01E+01 | 8.00E+01 | 1.51E-09 | 13.91 |
| 142 | Phytoplankton | (11) | <i>Phaeodactylum</i> <i>tricornutum</i> | 15.00 | 1.01E+01 | 8.00E+01 | 1.57E-09 | 24.02 |
| 143 | Phytoplankton | (11) | <i>Phaeodactylum</i> <i>tricornutum</i> | 15.00 | 1.01E+01 | 8.00E+01 | 1.60E-09 | 39.68 |
| 144 | Phytoplankton | (11) | <i>Phaeodactylum</i> <i>tricornutum</i> | 15.00 | 1.01E+01 | 8.00E+01 | 1.60E-09 | 47.60 |
| 145 | Phytoplankton | (12) | <i>Phaeodactylum</i> <i>tricornutum</i> | 20.00 | 1.01E+01 | 8.00E+01 | 1.58E-10 | 12.96 |
| 146 | Phytoplankton | (12) | <i>Phaeodactylum</i> <i>tricornutum</i> | 20.00 | 1.01E+01 | 8.00E+01 | 8.16E-11 | 12.96 |
| 147 | Phytoplankton | (12) | <i>Phaeodactylum</i> <i>tricornutum</i> | 20.00 | 1.01E+01 | 8.00E+01 | 1.66E-10 | 12.96 |
| 148 | Phytoplankton | (12) | <i>Phaeodactylum</i> <i>tricornutum</i> | 20.00 | 1.01E+01 | 8.00E+01 | 9.84E-11 | 12.96 |
| 149 | Phytoplankton | (13) | <i>Skeletonema</i> <i>costatum</i>      | 15.00 | 1.16E+01 | 9.54E+01 | 1.19E-09 | 6.48  |

|     |               |      |                                    |       |          |          |          |       |
|-----|---------------|------|------------------------------------|-------|----------|----------|----------|-------|
| 150 | Phytoplankton | (13) | <i>Skeletonema costatum</i>        | 15.00 | 1.16E+01 | 9.54E+01 | 1.19E-09 | 6.48  |
| 151 | Phytoplankton | (13) | <i>Skeletonema costatum</i>        | 15.00 | 1.16E+01 | 9.54E+01 | 9.37E-10 | 6.48  |
| 152 | Phytoplankton | (13) | <i>Skeletonema costatum</i>        | 15.00 | 1.16E+01 | 9.54E+01 | 7.03E-10 | 6.48  |
| 153 | Phytoplankton | (13) | <i>Skeletonema costatum</i>        | 15.00 | 1.16E+01 | 9.54E+01 | 8.20E-10 | 6.48  |
| 154 | Phytoplankton | (13) | <i>Skeletonema costatum</i>        | 15.00 | 1.16E+01 | 9.54E+01 | 6.88E-10 | 6.48  |
| 155 | Phytoplankton | (13) | <i>Skeletonema costatum</i>        | 15.00 | 1.14E+01 | 9.34E+01 | 5.38E-10 | 3.24  |
| 156 | Phytoplankton | (13) | <i>Skeletonema costatum</i>        | 15.00 | 1.14E+01 | 9.34E+01 | 4.70E-10 | 3.24  |
| 157 | Phytoplankton | (13) | <i>Skeletonema costatum</i>        | 15.00 | 1.14E+01 | 9.34E+01 | 4.70E-10 | 3.24  |
| 158 | Phytoplankton | (13) | <i>Skeletonema costatum</i>        | 15.00 | 1.14E+01 | 9.34E+01 | 3.70E-10 | 3.24  |
| 159 | Phytoplankton | (13) | <i>Skeletonema costatum</i>        | 15.00 | 1.14E+01 | 9.34E+01 | 4.70E-10 | 3.24  |
| 160 | Phytoplankton | (13) | <i>Skeletonema costatum</i>        | 15.00 | 1.14E+01 | 9.34E+01 | 4.54E-10 | 3.24  |
| 161 | Phytoplankton | (14) | <i>Synechococcus</i> A2169 strain  | 23.00 | 1.80E-01 | 5.50E-01 | 6.24E-12 | 2.52  |
| 162 | Phytoplankton | (14) | <i>Synechococcus</i> A2169 strain  | 23.00 | 1.80E-01 | 9.60E-01 | 3.12E-12 | 2.52  |
| 163 | Phytoplankton | (14) | <i>Synechococcus</i> A2169 strain  | 23.00 | 1.80E-01 | 9.60E-01 | 4.08E-12 | 2.52  |
| 164 | Phytoplankton | (14) | <i>Synechococcus</i> A2169 strain  | 23.00 | 1.80E-01 | 9.60E-01 | 3.60E-12 | 2.52  |
| 165 | Phytoplankton | (14) | <i>Synechococcus</i> WH7803 strain | 23.00 | 1.80E-01 | 9.60E-01 | 9.36E-12 | 2.52  |
| 166 | Phytoplankton | (14) | <i>Synechococcus</i> WH7803 strain | 23.00 | 1.80E-01 | 9.60E-01 | 3.84E-12 | 2.52  |
| 167 | Phytoplankton | (14) | <i>Synechococcus</i> WH7803 strain | 23.00 | 1.80E-01 | 9.60E-01 | 2.88E-12 | 2.52  |
| 168 | Phytoplankton | (15) | <i>Isochrysis galbana</i>          | 22.50 | 1.62E+00 | 3.60E+01 | 4.05E-12 | 0.07  |
| 169 | Phytoplankton | (15) | <i>Isochrysis galbana</i>          | 22.50 | 1.62E+00 | 3.60E+01 | 3.65E-11 | 0.07  |
| 170 | Phytoplankton | (15) | <i>Isochrysis galbana</i>          | 22.50 | 1.62E+00 | 3.60E+01 | 2.03E-11 | 0.21  |
| 171 | Phytoplankton | (15) | <i>Isochrysis galbana</i>          | 22.50 | 1.62E+00 | 3.60E+01 | 7.29E-11 | 0.21  |
| 172 | Phytoplankton | (16) | <i>Pycnococcus provasolii</i>      | 10.00 | 3.31E+00 | 1.83E+01 | 3.36E-12 | 0.13  |
| 173 | Phytoplankton | (16) | <i>Pycnococcus provasolii</i>      | 10.00 | 3.31E+00 | 1.83E+01 | 1.22E-11 | 0.43  |
| 174 | Phytoplankton | (16) | <i>Pycnococcus provasolii</i>      | 10.00 | 3.31E+00 | 1.83E+01 | 1.87E-11 | 0.86  |
| 175 | Phytoplankton | (16) | <i>Pycnococcus provasolii</i>      | 10.00 | 3.31E+00 | 1.83E+01 | 1.90E-11 | 2.38  |
| 176 | Phytoplankton | (16) | <i>Pycnococcus provasolii</i>      | 10.00 | 3.31E+00 | 1.83E+01 | 3.86E-11 | 4.75  |
| 177 | Phytoplankton | (16) | <i>Pycnococcus provasolii</i>      | 10.00 | 3.31E+00 | 1.83E+01 | 4.63E-11 | 15.55 |
| 178 | Phytoplankton | (16) | <i>Pycnococcus provasolii</i>      | 20.00 | 3.31E+00 | 1.83E+01 | 5.28E-11 | 0.95  |
| 179 | Phytoplankton | (16) | <i>Pycnococcus provasolii</i>      | 20.00 | 3.31E+00 | 1.83E+01 | 3.89E-11 | 1.30  |
| 180 | Phytoplankton | (16) | <i>Pycnococcus provasolii</i>      | 20.00 | 3.31E+00 | 1.83E+01 | 4.27E-11 | 2.38  |
| 181 | Phytoplankton | (16) | <i>Pycnococcus provasolii</i>      | 20.00 | 3.31E+00 | 1.83E+01 | 9.43E-11 | 4.75  |
| 182 | Phytoplankton | (16) | <i>Pycnococcus provasolii</i>      | 20.00 | 3.31E+00 | 1.83E+01 | 9.84E-11 | 15.55 |
| 183 | Phytoplankton | (16) | <i>Pycnococcus provasolii</i>      | 20.00 | 3.31E+00 | 1.83E+01 | 4.39E-11 | 2.16  |
| 184 | Phytoplankton | (16) | <i>Pycnococcus provasolii</i>      | 20.00 | 3.31E+00 | 1.83E+01 | 9.05E-11 | 5.62  |
| 185 | Phytoplankton | (16) | <i>Pycnococcus provasolii</i>      | 20.00 | 3.31E+00 | 1.83E+01 | 1.17E-10 | 12.10 |
| 186 | Phytoplankton | (16) | <i>Pycnococcus provasolii</i>      | 20.00 | 3.31E+00 | 1.83E+01 | 7.70E-11 | 22.46 |
| 187 | Phytoplankton | (16) | <i>Pycnococcus provasolii</i>      | 20.00 | 3.31E+00 | 1.83E+01 | 1.01E-10 | 31.97 |

|     |               |      |                      |       |          |          |          |      |
|-----|---------------|------|----------------------|-------|----------|----------|----------|------|
| 188 | Phytoplankton | (17) | Leptocylicus danicus | 5.00  | 7.41E+01 | 1.16E+03 | 4.43E-10 | 0.69 |
| 189 | Phytoplankton | (17) | Leptocylicus danicus | 5.00  | 7.41E+01 | 1.16E+03 | 4.34E-10 | 1.18 |
| 190 | Phytoplankton | (17) | Leptocylicus danicus | 5.00  | 7.41E+01 | 1.16E+03 | 3.56E-10 | 2.47 |
| 191 | Phytoplankton | (17) | Leptocylicus danicus | 5.00  | 7.41E+01 | 1.16E+03 | 4.75E-10 | 3.45 |
| 192 | Phytoplankton | (17) | Leptocylicus danicus | 5.00  | 7.41E+01 | 1.16E+03 | 4.41E-10 | 0.70 |
| 193 | Phytoplankton | (17) | Leptocylicus danicus | 5.00  | 7.41E+01 | 1.16E+03 | 4.48E-10 | 1.73 |
| 194 | Phytoplankton | (17) | Leptocylicus danicus | 5.00  | 7.41E+01 | 1.16E+03 | 4.31E-10 | 3.32 |
| 195 | Phytoplankton | (17) | Leptocylicus danicus | 5.00  | 7.41E+01 | 1.16E+03 | 5.62E-10 | 4.57 |
| 196 | Phytoplankton | (17) | Leptocylicus danicus | 5.00  | 7.41E+01 | 1.16E+03 | 5.51E-10 | 5.95 |
| 197 | Phytoplankton | (17) | Leptocylicus danicus | 5.00  | 7.41E+01 | 1.16E+03 | 4.66E-10 | 0.64 |
| 198 | Phytoplankton | (17) | Leptocylicus danicus | 5.00  | 7.41E+01 | 1.16E+03 | 5.06E-10 | 4.11 |
| 199 | Phytoplankton | (17) | Leptocylicus danicus | 5.00  | 7.41E+01 | 1.16E+03 | 1.02E-09 | 6.37 |
| 200 | Phytoplankton | (17) | Leptocylicus danicus | 10.00 | 7.53E+01 | 1.16E+03 | 5.75E-10 | 0.38 |
| 201 | Phytoplankton | (17) | Leptocylicus danicus | 10.00 | 7.53E+01 | 1.16E+03 | 6.59E-10 | 1.37 |
| 202 | Phytoplankton | (17) | Leptocylicus danicus | 10.00 | 7.53E+01 | 1.16E+03 | 8.84E-10 | 2.70 |
| 203 | Phytoplankton | (17) | Leptocylicus danicus | 10.00 | 7.53E+01 | 1.16E+03 | 9.82E-10 | 3.94 |
| 204 | Phytoplankton | (17) | Leptocylicus danicus | 10.00 | 7.53E+01 | 1.16E+03 | 5.38E-10 | 0.73 |
| 205 | Phytoplankton | (17) | Leptocylicus danicus | 10.00 | 7.53E+01 | 1.16E+03 | 7.09E-10 | 1.82 |
| 206 | Phytoplankton | (17) | Leptocylicus danicus | 10.00 | 7.53E+01 | 1.16E+03 | 9.09E-10 | 3.44 |
| 207 | Phytoplankton | (17) | Leptocylicus danicus | 10.00 | 7.53E+01 | 1.16E+03 | 1.03E-09 | 4.91 |
| 208 | Phytoplankton | (17) | Leptocylicus danicus | 10.00 | 7.53E+01 | 1.16E+03 | 1.07E-09 | 6.33 |
| 209 | Phytoplankton | (17) | Leptocylicus danicus | 10.00 | 7.53E+01 | 1.16E+03 | 9.85E-10 | 4.34 |
| 210 | Phytoplankton | (17) | Leptocylicus danicus | 10.00 | 7.53E+01 | 1.16E+03 | 7.97E-10 | 2.23 |
| 211 | Phytoplankton | (17) | Leptocylicus danicus | 10.00 | 7.53E+01 | 1.16E+03 | 6.01E-10 | 0.87 |
| 212 | Phytoplankton | (17) | Leptocylicus danicus | 15.00 | 9.26E+01 | 1.16E+03 | 1.44E-09 | 1.81 |
| 213 | Phytoplankton | (17) | Leptocylicus danicus | 15.00 | 9.26E+01 | 1.16E+03 | 1.76E-09 | 4.59 |
| 214 | Phytoplankton | (17) | Leptocylicus danicus | 15.00 | 9.26E+01 | 1.16E+03 | 1.84E-09 | 5.79 |
| 215 | Phytoplankton | (17) | Leptocylicus danicus | 15.00 | 9.26E+01 | 1.16E+03 | 7.10E-10 | 0.69 |
| 216 | Phytoplankton | (17) | Leptocylicus danicus | 15.00 | 9.26E+01 | 1.16E+03 | 1.28E-09 | 0.88 |
| 217 | Phytoplankton | (17) | Leptocylicus danicus | 15.00 | 9.26E+01 | 1.16E+03 | 1.85E-09 | 2.40 |
| 218 | Phytoplankton | (17) | Leptocylicus danicus | 15.00 | 9.26E+01 | 1.16E+03 | 2.25E-09 | 3.62 |
| 219 | Phytoplankton | (17) | Leptocylicus danicus | 15.00 | 9.26E+01 | 1.16E+03 | 2.94E-09 | 6.05 |
| 220 | Phytoplankton | (17) | Leptocylicus danicus | 15.00 | 9.26E+01 | 1.16E+03 | 1.64E-09 | 1.09 |
| 221 | Phytoplankton | (17) | Leptocylicus danicus | 15.00 | 9.26E+01 | 1.16E+03 | 2.30E-09 | 3.08 |
| 222 | Phytoplankton | (17) | Leptocylicus danicus | 15.00 | 9.26E+01 | 1.16E+03 | 3.09E-09 | 7.68 |
| 223 | Phytoplankton | (17) | Leptocylicus danicus | 15.00 | 9.26E+01 | 1.16E+03 | 3.23E-09 | 9.67 |
| 224 | Phytoplankton | (17) | Leptocylicus danicus | 20.00 | 1.32E+02 | 1.16E+03 | 2.04E-09 | 0.47 |
| 225 | Phytoplankton | (17) | Leptocylicus danicus | 20.00 | 1.32E+02 | 1.16E+03 | 3.47E-09 | 1.33 |

|     |               |      |                      |       |          |          |          |       |
|-----|---------------|------|----------------------|-------|----------|----------|----------|-------|
| 226 | Phytoplankton | (17) | Leptocylicus danicus | 20.00 | 1.32E+02 | 1.16E+03 | 5.13E-09 | 4.51  |
| 227 | Phytoplankton | (17) | Leptocylicus danicus | 20.00 | 1.32E+02 | 1.16E+03 | 5.45E-09 | 6.08  |
| 228 | Phytoplankton | (17) | Leptocylicus danicus | 20.00 | 1.32E+02 | 1.16E+03 | 2.72E-09 | 0.47  |
| 229 | Phytoplankton | (17) | Leptocylicus danicus | 20.00 | 1.32E+02 | 1.16E+03 | 4.19E-09 | 1.61  |
| 230 | Phytoplankton | (17) | Leptocylicus danicus | 20.00 | 1.32E+02 | 1.16E+03 | 5.28E-09 | 6.14  |
| 231 | Phytoplankton | (17) | Leptocylicus danicus | 20.00 | 1.32E+02 | 1.16E+03 | 5.65E-09 | 8.20  |
| 232 | Phytoplankton | (17) | Leptocylicus danicus | 20.00 | 1.32E+02 | 1.16E+03 | 3.00E-09 | 0.78  |
| 233 | Phytoplankton | (17) | Leptocylicus danicus | 20.00 | 1.32E+02 | 1.16E+03 | 4.96E-09 | 2.25  |
| 234 | Phytoplankton | (17) | Leptocylicus danicus | 20.00 | 1.32E+02 | 1.16E+03 | 6.95E-09 | 7.70  |
| 235 | Phytoplankton | (17) | Leptocylicus danicus | 20.00 | 1.32E+02 | 1.16E+03 | 6.68E-09 | 10.32 |
| 236 | Phytoplankton | (18) |                      | 20.00 | 3.40E+00 | 2.81E+01 | 5.87E-11 | 1.08  |
| 237 | Phytoplankton | (18) |                      | 20.00 | 3.40E+00 | 2.81E+01 | 7.31E-11 | 1.08  |
| 238 | Phytoplankton | (18) |                      | 20.00 | 3.40E+00 | 2.81E+01 | 1.29E-10 | 1.08  |
| 239 | Phytoplankton | (18) |                      | 20.00 | 4.11E+00 | 3.42E+01 | 5.79E-10 | 1.08  |
| 240 | Phytoplankton | (18) |                      | 20.00 | 4.11E+00 | 3.42E+01 | 6.05E-10 | 1.08  |
| 241 | Phytoplankton | (18) |                      | 20.00 | 2.17E+02 | 2.11E+03 | 2.53E-09 | 1.08  |
| 242 | Phytoplankton | (18) |                      | 20.00 | 2.17E+02 | 2.11E+03 | 2.22E-09 | 1.08  |
| 243 | Phytoplankton | (18) |                      | 20.00 | 2.17E+02 | 2.11E+03 | 2.13E-09 | 1.08  |
| 244 | Phytoplankton | (18) |                      | 20.00 | 2.17E+02 | 2.11E+03 | 2.04E-09 | 1.08  |
| 245 | Phytoplankton | (18) |                      | 20.00 | 1.85E+03 | 1.95E+04 | 3.65E-08 | 1.08  |
| 246 | Phytoplankton | (18) |                      | 20.00 | 1.85E+03 | 1.95E+04 | 3.81E-08 | 1.08  |
| 247 | Phytoplankton | (18) |                      | 20.00 | 1.85E+03 | 1.95E+04 | 1.09E-07 | 1.08  |
| 248 | Phytoplankton | (18) |                      | 20.00 | 2.16E+04 | 2.50E+05 | 1.00E-07 | 1.08  |
| 249 | Phytoplankton | (18) |                      | 20.00 | 2.16E+04 | 2.50E+05 | 8.81E-08 | 1.08  |
| 250 | Phytoplankton | (18) |                      | 20.00 | 2.96E+04 | 3.47E+05 | 6.27E-08 | 1.08  |
| 251 | Phytoplankton | (18) |                      | 20.00 | 3.15E+04 | 3.70E+05 | 6.12E-08 | 1.08  |
| 252 | Phytoplankton | (18) |                      | 20.00 | 3.15E+04 | 3.70E+05 | 4.31E-08 | 1.08  |
| 253 | Phytoplankton | (18) |                      | 20.00 | 9.25E+02 | 9.49E+03 | 2.86E-10 | 1.08  |
| 254 | Phytoplankton | (18) |                      | 20.00 | 1.45E+01 | 1.27E+02 | 9.15E-11 | 1.08  |
| 255 | Phytoplankton | (18) |                      | 20.00 | 1.45E+01 | 1.27E+02 | 1.48E-10 | 1.08  |
| 256 | Phytoplankton | (18) |                      | 20.00 | 1.45E+01 | 1.27E+02 | 1.42E-10 | 1.08  |
| 257 | Phytoplankton | (18) |                      | 20.00 | 9.25E+02 | 9.49E+03 | 6.87E-10 | 1.08  |
| 258 | Phytoplankton | (18) |                      | 20.00 | 9.25E+02 | 9.49E+03 | 6.57E-10 | 1.08  |
| 259 | Phytoplankton | (18) |                      | 20.00 | 3.15E+04 | 3.70E+05 | 4.50E-08 | 1.08  |
| 260 | Bacteria      | (19) |                      | 15.60 | 1.00E-02 | 9.91E-02 | 1.87E-12 |       |
| 261 | Bacteria      | (19) |                      | 19.70 | 1.00E-02 | 9.91E-02 | 3.43E-12 |       |
| 262 | Bacteria      | (19) |                      | 18.60 | 1.00E-02 | 9.91E-02 | 5.00E-12 |       |
| 263 | Bacteria      | (20) |                      | 23.90 | 2.00E-02 | 9.91E-02 | 4.32E-12 |       |

|     |                  |      |                                     |       |          |          |          |
|-----|------------------|------|-------------------------------------|-------|----------|----------|----------|
| 264 | Bacteria         | (20) |                                     | 23.90 | 2.00E-02 | 9.91E-02 | 2.64E-12 |
| 265 | Bacteria         | (20) |                                     | 24.70 | 2.00E-02 | 9.91E-02 | 7.92E-12 |
| 266 | Bacteria         | (21) |                                     | 26.60 | 1.00E-02 | 9.91E-02 | 5.05E-12 |
| 267 | Bacteria         | (21) |                                     | 25.80 | 1.00E-02 | 9.91E-02 | 2.63E-11 |
| 268 | Bacteria         | (21) |                                     | 24.90 | 1.00E-02 | 9.91E-02 | 6.22E-12 |
| 269 | Bacteria         | (21) |                                     | 6.50  | 1.00E-02 | 9.91E-02 | 1.20E-12 |
| 270 | Bacteria         | (21) |                                     | 27.00 | 1.00E-02 | 9.91E-02 | 8.77E-12 |
| 271 | Bacteria         | (21) |                                     | 26.00 | 1.00E-02 | 9.91E-02 | 1.11E-11 |
| 272 | Bacteria         | (21) |                                     | 28.40 | 1.00E-02 | 9.91E-02 | 6.32E-12 |
| 273 | Bacteria         | (21) |                                     | 28.50 | 1.00E-02 | 9.91E-02 | 1.83E-11 |
| 274 | Bacteria         | (21) |                                     | 28.00 | 1.00E-02 | 9.91E-02 | 9.00E-12 |
| 275 | Bacteria         | (21) |                                     | 27.00 | 1.00E-02 | 9.91E-02 | 4.73E-12 |
| 276 | Bacteria         | (21) |                                     | 28.00 | 1.00E-02 | 9.91E-02 | 1.13E-11 |
| 277 | Bacteria         | (21) |                                     | 28.00 | 1.00E-02 | 9.91E-02 | 7.29E-12 |
| 278 | Bacteria         | (22) |                                     | -1.00 | 4.30E-02 | 1.54E-01 | 1.03E-12 |
| 279 | Bacteria         | (22) |                                     | 0.00  | 2.10E-02 | 7.50E-02 | 1.14E-13 |
| 280 | Bacteria         | (22) |                                     | 0.00  | 2.08E-02 | 7.42E-02 | 1.61E-14 |
| 281 | Bacteria         | (22) |                                     | 0.00  | 2.48E-02 | 8.85E-02 | 2.23E-12 |
| 282 | Bacteria         | (22) |                                     | 2.00  | 1.46E-02 | 5.22E-02 | 2.49E-13 |
| 283 | Bacteria         | (22) |                                     | 0.00  | 2.45E-02 | 8.75E-02 | 1.09E-13 |
| 284 | Bacteria         | (22) |                                     | 0.00  | 2.66E-02 | 9.50E-02 | 1.07E-12 |
| 285 | Bacteria         | (23) |                                     | 1.00  | 1.95E-02 | 7.50E-02 | 1.16E-12 |
| 286 | Bacteria         | (23) |                                     | 1.00  | 3.36E-02 | 1.20E-01 | 1.04E-12 |
| 287 | Bacteria         | (23) |                                     | 1.00  | 4.76E-02 | 1.70E-01 | 7.14E-13 |
| 288 | Bacteria         | (24) |                                     | 14.32 | 1.00E-02 | 9.91E-02 | 5.21E-12 |
| 289 | Bacteria         | (24) |                                     | 14.32 | 1.00E-02 | 9.91E-02 | 3.01E-12 |
| 290 | Bacteria         | (24) |                                     | 14.66 | 1.00E-02 | 9.91E-02 | 1.14E-12 |
| 291 | Bacteria         | (24) |                                     | 15.34 | 1.00E-02 | 9.91E-02 | 3.74E-13 |
| 292 | Bacteria         | (24) |                                     | 18.41 | 1.00E-02 | 9.91E-02 | 5.05E-12 |
| 293 | Bacteria         | (24) |                                     | 21.82 | 1.00E-02 | 9.91E-02 | 6.21E-13 |
| 294 | Microzooplankton | (25) | Strombidium capitatum - small cells | 15.00 | 4.50E+03 | 3.21E+04 | 3.60E-07 |
| 295 | Microzooplankton | (25) | Strombidium capitatum - large cells | 15.00 | 1.60E+04 | 1.14E+05 | 4.80E-07 |
| 296 | Microzooplankton | (26) | Tintinnopsis acuminata              | 15.00 | 8.66E+02 | 6.19E+03 | 8.60E-08 |
| 297 | Microzooplankton | (26) | Tintinnopsis acuminata              | 20.00 | 8.47E+02 | 6.05E+03 | 1.56E-07 |
| 298 | Microzooplankton | (26) | Tintinnopsis acuminata              | 25.00 | 8.22E+02 | 5.87E+03 | 2.28E-07 |
| 299 | Microzooplankton | (26) | Tintinnopsis vasculum               | 5.00  | 8.94E+03 | 6.39E+04 | 2.28E-07 |
| 300 | Microzooplankton | (26) | Tintinnopsis vasculum               | 10.00 | 8.68E+03 | 6.20E+04 | 6.28E-07 |
| 301 | Microzooplankton | (26) | Tintinnopsis vasculum               | 15.00 | 8.34E+03 | 5.96E+04 | 9.24E-07 |



|     |                  |      |                                  |       |          |          |          |
|-----|------------------|------|----------------------------------|-------|----------|----------|----------|
| 302 | Microzooplankton | (27) | <i>Acanthamoeba</i> sp.          | 28.00 | 5.87E+02 | 4.54E+03 | 1.08E-08 |
| 303 | Microzooplankton | (27) | <i>Acanthamoeba</i> sp.          | 30.00 | 3.98E+02 | 3.00E+03 | 2.89E-08 |
| 304 | Microzooplankton | (27) | <i>A. castellanii</i>            | 30.00 | 5.07E+02 | 3.88E+03 | 2.72E-08 |
| 305 | Microzooplankton | (27) | <i>A. castellanii</i>            | 30.00 | 2.18E+02 | 2.49E+03 | 6.86E-08 |
| 306 | Microzooplankton | (27) | <i>A. castellanii</i>            | 30.00 | 2.18E+02 | 2.49E+03 | 9.21E-09 |
| 307 | Microzooplankton | (27) | <i>A. castellanii</i>            | 30.00 | 9.93E+01 | 1.00E+03 | 1.44E-08 |
| 308 | Microzooplankton | (27) | <i>A. palestinensis</i>          | 27.00 | 8.54E+02 | 6.76E+03 | 1.25E-08 |
| 309 | Microzooplankton | (27) | <i>A. palestinensis</i>          | 27.00 | 4.66E+02 | 3.55E+03 | 2.35E-09 |
| 310 | Microzooplankton | (27) | <i>A. rhyodes</i>                | 30.00 | 6.43E+02 | 5.00E+03 | 1.77E-08 |
| 311 | Microzooplankton | (27) | <i>Actinosphaerium eichhorni</i> | 21.80 | 1.11E+06 | 1.40E+07 | 1.21E-06 |
| 312 | Microzooplankton | (27) | <i>Allogromia laticollaris</i>   | 35.00 | 5.10E+06 | 7.10E+07 | 4.61E-05 |
| 313 | Microzooplankton | (27) | <i>A. laticollaris</i>           | 21.00 | 3.94E+06 | 5.40E+07 | 9.52E-06 |
| 314 | Microzooplankton | (27) | <i>Amoeba proteus</i>            | 21.00 | 8.75E+04 | 9.36E+05 | 1.72E-07 |
| 315 | Microzooplankton | (27) | <i>A. proteus</i>                | 22.80 | 2.05E+05 | 2.32E+06 | 3.23E-07 |
| 316 | Microzooplankton | (27) | <i>A. proteus</i>                | 22.80 | 8.75E+04 | 9.36E+05 | 2.34E-06 |
| 317 | Microzooplankton | (27) | <i>A. proteus</i>                | 22.80 | 8.43E+04 | 9.00E+05 | 5.85E-07 |
| 318 | Microzooplankton | (27) | <i>A. proteus</i>                | 22.80 | 4.86E+04 | 5.00E+05 | 2.47E-07 |
| 319 | Microzooplankton | (27) | <i>A. proteus</i>                | 22.80 | 1.28E+05 | 1.40E+06 | 1.40E-06 |
| 320 | Microzooplankton | (27) | <i>Chaos carolinense</i>         | 25.00 | 2.10E+06 | 2.76E+07 | 5.58E-06 |
| 321 | Microzooplankton | (27) | <i>C. carolinense</i>            | 25.00 | 2.75E+06 | 3.68E+07 | 1.60E-05 |
| 322 | Microzooplankton | (27) | <i>C. carolinense</i>            | 25.00 | 2.63E+06 | 3.51E+07 | 1.12E-05 |
| 323 | Microzooplankton | (27) | <i>C. carolinense</i>            | 20.00 | 2.63E+06 | 3.51E+07 | 9.21E-06 |
| 324 | Microzooplankton | (27) | <i>C. carolinense</i>            | 20.00 | 3.67E+06 | 5.00E+07 | 1.81E-06 |
| 325 | Microzooplankton | (27) | <i>C. carolinense</i>            | 20.00 | 9.98E+05 | 1.25E+07 | 4.50E-06 |
| 326 | Microzooplankton | (27) | <i>C. carolinense</i>            | 26.00 | 1.55E+06 | 2.00E+07 | 1.00E-05 |
| 327 | Microzooplankton | (27) | <i>C. carolinense</i>            | 25.00 | 2.62E+06 | 3.50E+07 | 8.41E-06 |
| 328 | Microzooplankton | (27) | <i>C. carolinense</i>            | 25.00 | 1.18E+06 | 1.50E+07 | 5.91E-06 |
| 329 | Microzooplankton | (27) | <i>C. carolinense</i>            | 25.00 | 4.62E+05 | 5.50E+06 | 2.15E-06 |
| 330 | Microzooplankton | (27) | <i>Diffugia</i> sp.              | 25.00 | 9.09E+04 | 9.75E+05 | 1.76E-06 |
| 331 | Microzooplankton | (27) | <i>Rosalina leei</i>             | 25.00 | 8.67E+06 | 1.25E+08 | 8.85E-05 |
| 332 | Microzooplankton | (27) | <i>Spiroloculina hyalini</i>     | 25.00 | 2.94E+05 | 3.40E+06 | 2.92E-05 |
| 333 | Microzooplankton | (27) | <i>Astasia klebsii</i>           | 25.20 | 1.41E+02 | 1.50E+03 | 2.03E-09 |
| 334 | Microzooplankton | (27) | <i>Astasia klebsii</i>           | 25.20 | 7.63E+02 | 6.00E+03 | 7.45E-08 |
| 335 | Microzooplankton | (27) | <i>A. longa</i>                  | 25.20 | 2.15E+02 | 2.46E+03 | 3.49E-08 |
| 336 | Microzooplankton | (27) | <i>A. longa</i>                  | 26.00 | 1.08E+02 | 1.10E+03 | 5.03E-09 |
| 337 | Microzooplankton | (27) | <i>A. longa</i>                  | 26.00 | 2.16E+02 | 2.47E+03 | 2.76E-08 |
| 338 | Microzooplankton | (27) | <i>A. longa</i>                  | 26.00 | 1.08E+02 | 1.10E+03 | 9.74E-09 |
| 339 | Microzooplankton | (27) | <i>A. longa</i>                  | 26.00 | 2.16E+02 | 2.47E+03 | 4.55E-08 |

|     |                  |      |                              |       |          |          |          |
|-----|------------------|------|------------------------------|-------|----------|----------|----------|
| 340 | Microzooplankton | (27) | <i>A. longa</i>              | 28.50 | 2.18E+02 | 2.50E+03 | 7.18E-09 |
| 341 | Microzooplankton | (27) | <i>A. longa</i>              | 28.50 | 7.12E+02 | 5.57E+03 | 5.33E-08 |
| 342 | Microzooplankton | (27) | <i>Chilomonas paramecium</i> | 25.00 | 1.10E+02 | 1.12E+03 | 1.82E-08 |
| 343 | Microzooplankton | (27) | <i>C. paramecium</i>         | 25.00 | 1.41E+02 | 1.50E+03 | 1.50E-08 |
| 344 | Microzooplankton | (27) | <i>C. paramecium</i>         | 25.00 | 2.37E+02 | 2.75E+03 | 4.02E-08 |
| 345 | Microzooplankton | (27) | <i>C. paramecium</i>         | 25.00 | 2.37E+02 | 2.75E+03 | 5.36E-08 |
| 346 | Microzooplankton | (27) | <i>C. paramecium</i>         | 24.50 | 9.93E+01 | 1.00E+03 | 3.22E-09 |
| 347 | Microzooplankton | (27) | <i>C. paramecium</i>         | 24.50 | 3.98E+02 | 3.00E+03 | 5.61E-08 |
| 348 | Microzooplankton | (27) | <i>C. paramecium</i>         | 24.50 | 1.10E+02 | 1.12E+03 | 2.20E-08 |
| 349 | Microzooplankton | (27) | <i>Euglena gracilis</i>      | 26.00 | 1.47E+02 | 1.58E+03 | 6.98E-09 |
| 350 | Microzooplankton | (27) | <i>E. gracilis</i>           | 26.50 | 8.90E+02 | 7.07E+03 | 6.74E-08 |
| 351 | Microzooplankton | (27) | <i>Ochromonas</i> sp.        | 26.50 | 3.01E+01 | 2.50E+02 | 6.47E-09 |
| 352 | Microzooplankton | (27) | <i>Ochromonas</i> sp.        | 26.50 | 1.01E+01 | 7.00E+01 | 1.18E-10 |
| 353 | Microzooplankton | (27) | <i>Pleuromonas jaculans</i>  | 26.50 | 7.55E+00 | 5.00E+01 | 2.71E-09 |
| 354 | Microzooplankton | (27) | <i>Pleuromonas jaculans</i>  | 26.50 | 4.16E+00 | 2.50E+01 | 8.83E-11 |
| 355 | Microzooplankton | (27) | <i>Blepharisma undulans</i>  | 26.50 | 2.66E+04 | 1.40E+05 | 1.18E-07 |
| 356 | Microzooplankton | (27) | <i>Bresslaua insidiatrix</i> | 25.00 | 6.42E+03 | 3.30E+04 | 4.85E-07 |
| 357 | Microzooplankton | (27) | <i>Bresslaua insidiatrix</i> | 25.00 | 2.95E+03 | 1.50E+04 | 9.09E-08 |
| 358 | Microzooplankton | (27) | <i>Carchesium polypinum</i>  | 25.00 | 4.33E+04 | 2.30E+05 | 1.42E-06 |
| 359 | Microzooplankton | (27) | <i>Coleps hirtus</i>         | 25.00 | 1.34E+04 | 7.00E+04 | 5.30E-07 |
| 360 | Microzooplankton | (27) | <i>Colpidium campylum</i>    | 24.00 | 8.32E+03 | 4.30E+04 | 1.63E-07 |
| 361 | Microzooplankton | (27) | <i>C. campylum</i>           | 24.00 | 8.32E+03 | 4.30E+04 | 1.60E-07 |
| 362 | Microzooplankton | (27) | <i>Colpoda cucullus</i>      | 24.00 | 3.22E+03 | 1.64E+04 | 1.39E-08 |
| 363 | Microzooplankton | (27) | <i>Colpoda cucullus</i>      | 24.00 | 8.70E+03 | 4.50E+04 | 1.21E-07 |
| 364 | Microzooplankton | (27) | <i>C. steinii</i>            | 30.00 | 1.98E+03 | 1.00E+04 | 1.81E-07 |
| 365 | Microzooplankton | (27) | <i>Didinium nasutum</i>      | 30.00 | 5.52E+04 | 2.94E+05 | 1.48E-06 |
| 366 | Microzooplankton | (27) | <i>Didinium nasutum</i>      | 30.00 | 2.17E+05 | 1.18E+06 | 5.89E-06 |
| 367 | Microzooplankton | (27) | <i>Dileptus cygnus</i>       | 23.00 | 4.36E+05 | 2.40E+06 | 3.22E-06 |
| 368 | Microzooplankton | (27) | <i>Diophrys</i> sp.          | 23.00 | 4.11E+03 | 2.10E+04 | 1.74E-07 |
| 369 | Microzooplankton | (27) | <i>Euplotes vannus</i>       | 25.00 | 1.49E+03 | 7.50E+03 | 1.12E-08 |
| 370 | Microzooplankton | (27) | <i>Frontonia leucas</i>      | 25.00 | 1.14E+05 | 6.14E+05 | 7.73E-08 |
| 371 | Microzooplankton | (27) | <i>Intranstylum steini</i>   | 25.00 | 5.07E+03 | 2.60E+04 | 2.55E-07 |
| 372 | Microzooplankton | (27) | <i>Opercularia nutans</i>    | 25.00 | 2.29E+04 | 1.20E+05 | 6.77E-07 |
| 373 | Microzooplankton | (27) | <i>Paramecium aurelia</i>    | 25.00 | 1.92E+04 | 1.00E+05 | 5.36E-07 |
| 374 | Microzooplankton | (27) | <i>P. aurelia</i>            | 27.00 | 3.78E+04 | 2.00E+05 | 3.86E-07 |
| 375 | Microzooplankton | (27) | <i>P. aurelia</i>            | 26.00 | 3.78E+04 | 2.00E+05 | 1.27E-06 |
| 376 | Microzooplankton | (27) | <i>P. aurelia</i>            | 26.00 | 3.00E+04 | 1.58E+05 | 5.36E-08 |
| 377 | Microzooplankton | (27) | <i>P. calkinsi</i>           | 26.00 | 2.57E+04 | 1.35E+05 | 1.72E-07 |

|     |                  |      |                             |       |          |          |          |
|-----|------------------|------|-----------------------------|-------|----------|----------|----------|
| 378 | Microzooplankton | (27) | <i>P. caudatum</i>          | 21.20 | 9.31E+04 | 5.00E+05 | 5.71E-07 |
| 379 | Microzooplankton | (27) | <i>P. caudatum</i>          | 21.20 | 1.19E+05 | 6.40E+05 | 2.46E-06 |
| 380 | Microzooplankton | (27) | <i>P. caudatum</i>          | 22.70 | 3.78E+04 | 2.00E+05 | 1.60E-06 |
| 381 | Microzooplankton | (27) | <i>P. caudatum</i>          | 22.70 | 2.20E+05 | 1.20E+06 | 5.74E-06 |
| 382 | Microzooplankton | (27) | <i>P. caudatum</i>          | 25.00 | 1.75E+05 | 9.50E+05 | 2.73E-06 |
| 383 | Microzooplankton | (27) | <i>P. caudatum</i>          | 25.00 | 3.22E+04 | 1.70E+05 | 2.88E-07 |
| 384 | Microzooplankton | (27) | <i>P. caudatum</i>          | 25.00 | 9.86E+04 | 5.30E+05 | 1.14E-06 |
| 385 | Microzooplankton | (27) | <i>Placus sp.1</i>          | 28.80 | 7.16E+04 | 3.83E+05 | 1.89E-06 |
| 386 | Microzooplankton | (27) | <i>Placus sp.2</i>          | 28.80 | 1.32E+05 | 7.12E+05 | 1.54E-06 |
| 387 | Microzooplankton | (27) | <i>Podophrya fixa</i>       | 28.80 | 9.56E+03 | 4.95E+04 | 4.14E-08 |
| 388 | Microzooplankton | (27) | <i>Podophrya fixa</i>       | 28.80 | 2.93E+03 | 1.49E+04 | 1.52E-08 |
| 389 | Microzooplankton | (27) | <i>Spirostomum ambiguum</i> | 25.00 | 1.42E+06 | 8.00E+06 | 2.68E-06 |
| 390 | Microzooplankton | (27) | <i>S. ambiguum</i>          | 25.00 | 2.12E+06 | 1.20E+07 | 1.92E-05 |
| 391 | Microzooplankton | (27) | <i>S. intermedium</i>       | 25.00 | 9.31E+04 | 5.00E+05 | 4.09E-07 |
| 392 | Microzooplankton | (27) | <i>S. minus</i>             | 25.00 | 9.31E+04 | 5.00E+05 | 4.70E-07 |
| 393 | Microzooplankton | (27) | <i>S. teres</i>             | 25.00 | 6.53E+04 | 3.49E+05 | 6.21E-08 |
| 394 | Microzooplankton | (27) | <i>Stentor coeruleus</i>    | 25.00 | 2.44E+05 | 1.33E+06 | 2.27E-06 |
| 395 | Microzooplankton | (27) | <i>S. coeruleus</i>         | 25.00 | 1.84E+05 | 1.00E+06 | 1.14E-07 |
| 396 | Microzooplankton | (27) | <i>S. coeruleus</i>         | 25.00 | 1.30E+06 | 7.30E+06 | 5.30E-07 |
| 397 | Microzooplankton | (27) | <i>Strombidium sp.</i>      | 22.00 | 3.06E+02 | 1.50E+03 | 1.37E-07 |
| 398 | Microzooplankton | (27) | <i>Stylonychia mytilus</i>  | 22.00 | 1.66E+05 | 9.00E+05 | 2.87E-06 |
| 399 | Microzooplankton | (27) | <i>Tetrahymena geleii</i>   | 21.00 | 4.39E+03 | 2.24E+04 | 6.83E-08 |
| 400 | Microzooplankton | (27) | <i>T. geleii</i>            | 26.80 | 1.04E+04 | 5.40E+04 | 4.63E-07 |
| 401 | Microzooplankton | (27) | <i>T. geleii</i>            | 26.80 | 6.22E+03 | 3.20E+04 | 1.50E-07 |
| 402 | Microzooplankton | (27) | <i>T. geleii</i>            | 25.00 | 4.61E+03 | 2.36E+04 | 7.14E-07 |
| 403 | Microzooplankton | (27) | <i>T. pyriformis</i>        | 22.00 | 1.98E+03 | 1.00E+04 | 5.62E-08 |
| 404 | Microzooplankton | (27) | <i>T. pyriformis</i>        | 25.00 | 1.98E+03 | 1.00E+04 | 3.02E-08 |
| 405 | Microzooplankton | (27) | <i>T. pyriformis</i>        | 28.00 | 9.66E+03 | 5.00E+04 | 9.78E-07 |
| 406 | Microzooplankton | (27) | <i>T. pyriformis</i>        | 28.00 | 2.95E+03 | 1.50E+04 | 8.95E-08 |
| 407 | Microzooplankton | (27) | <i>T. pyriformis</i>        | 25.00 | 1.00E+03 | 5.00E+03 | 1.07E-08 |
| 408 | Microzooplankton | (27) | <i>T. pyriformis</i>        | 25.00 | 2.95E+03 | 1.50E+04 | 9.55E-08 |
| 409 | Microzooplankton | (27) | <i>T. pyriformis</i>        | 26.00 | 1.98E+03 | 1.00E+04 | 3.22E-07 |
| 410 | Microzooplankton | (27) | <i>T. pyriformis</i>        | 27.00 | 1.98E+03 | 1.00E+04 | 1.33E-07 |
| 411 | Microzooplankton | (27) | <i>T. pyriformis</i>        | 28.00 | 1.98E+03 | 1.00E+04 | 6.90E-08 |
| 412 | Microzooplankton | (27) | <i>T. pyriformis</i>        | 28.00 | 1.98E+03 | 1.00E+04 | 1.94E-07 |
| 413 | Microzooplankton | (27) | <i>T. pyriformis</i>        | 28.00 | 1.59E+03 | 8.00E+03 | 3.92E-08 |
| 414 | Microzooplankton | (27) | <i>T. pyriformis</i>        | 28.00 | 2.18E+03 | 1.10E+04 | 3.54E-07 |
| 415 | Microzooplankton | (27) | <i>T. pyriformis</i>        | 28.00 | 4.21E+03 | 2.15E+04 | 2.22E-07 |

|     |                  |      |                                   |       |          |          |          |
|-----|------------------|------|-----------------------------------|-------|----------|----------|----------|
| 416 | Microzooplankton | (27) | <i>T. pyriformis</i>              | 28.00 | 4.21E+03 | 2.15E+04 | 4.10E-08 |
| 417 | Microzooplankton | (27) | <i>T. pyriformis</i>              | 30.00 | 1.20E+03 | 6.00E+03 | 1.44E-06 |
| 418 | Microzooplankton | (27) | <i>T. pyriformis</i>              | 30.00 | 2.57E+03 | 1.30E+04 | 1.38E-07 |
| 419 | Microzooplankton | (27) | <i>T. pyriformis</i>              | 30.00 | 3.54E+02 | 1.74E+03 | 8.14E-09 |
| 420 | Microzooplankton | (27) | <i>T. pyriformis</i>              | 30.00 | 2.91E+03 | 1.48E+04 | 3.15E-07 |
| 421 | Microzooplankton | (27) | <i>Tiafina fusus</i>              | 24.00 | 5.27E+03 | 2.70E+04 | 2.08E-07 |
| 422 | Microzooplankton | (27) | <i>Tracheloraphis</i> sp.         | 25.00 | 6.37E+04 | 3.40E+05 | 1.61E-06 |
| 423 | Microzooplankton | (27) | <i>Uronema marinum</i>            | 25.00 | 1.04E+02 | 5.00E+02 | 2.06E-08 |
| 424 | Microzooplankton | (27) | <i>Urostyla grandis</i>           | 20.00 | 3.14E+04 | 1.66E+05 | 1.61E-07 |
| 425 | Microzooplankton | (27) | <i>Urostyla grandis</i>           | 20.00 | 3.14E+04 | 1.66E+05 | 1.82E-06 |
| 426 | Microzooplankton | (27) | <i>Vorticella convallaria</i>     | 20.00 | 1.02E+05 | 5.50E+05 | 9.00E-07 |
| 427 | Microzooplankton | (27) | <i>V. ephemerae</i>               | 20.00 | 3.73E+03 | 1.90E+04 | 1.20E-07 |
| 428 | Microzooplankton | (27) | <i>V. microstoma</i>              | 20.00 | 5.07E+03 | 2.60E+04 | 1.05E-08 |
| 429 | Microzooplankton | (27) | <i>V. similis</i>                 | 20.00 | 1.95E+04 | 1.02E+05 | 8.52E-07 |
| 430 | Microzooplankton | (27) | <i>Zoothamnium carinogammari</i>  | 20.00 | 9.47E+03 | 4.90E+04 | 3.85E-07 |
| 431 | Mesozooplankton  | (28) | <i>Aglantha digitale</i>          | 6.75  | 4.96E+08 | 1.49E+11 | 4.38E-03 |
| 432 | Mesozooplankton  | (28) | <i>Aglantha digitale</i>          | 10.15 | 6.33E+08 | 1.90E+11 | 5.76E-03 |
| 433 | Mesozooplankton  | (28) | <i>Pleurobrachia pileus</i>       | 7.25  | 1.25E+09 | 3.75E+11 | 1.16E-03 |
| 434 | Mesozooplankton  | (28) | <i>Pleurobrachia pileus</i>       | 7.25  | 6.83E+08 | 2.05E+11 | 1.25E-03 |
| 435 | Mesozooplankton  | (28) | <i>Beroe cucumis</i>              | 12.70 | 2.32E+09 | 6.97E+11 | 4.95E-03 |
| 436 | Mesozooplankton  | (28) | <i>Limacina helicina helicina</i> | 5.00  | 1.15E+08 | 2.10E+10 | 3.75E-04 |
| 437 | Mesozooplankton  | (28) | <i>Limacina helicina helicina</i> | 10.15 | 6.82E+07 | 1.25E+10 | 4.18E-04 |
| 438 | Mesozooplankton  | (28) | <i>Clione limacina limacina</i>   | 12.70 | 6.15E+09 | 1.13E+12 | 2.14E-02 |
| 439 | Mesozooplankton  | (28) | <i>Calanus cristatus</i>          | 6.00  | 1.13E+09 | 1.14E+10 | 2.50E-03 |
| 440 | Mesozooplankton  | (28) | <i>Calanus cristatus</i>          | 6.00  | 7.98E+08 | 8.00E+09 | 1.86E-03 |
| 441 | Mesozooplankton  | (28) | <i>Calanus plumchrus</i>          | 5.00  | 4.45E+08 | 4.46E+09 | 1.01E-03 |
| 442 | Mesozooplankton  | (28) | <i>Calanus plumchrus</i>          | 6.90  | 1.42E+08 | 1.42E+09 | 2.68E-04 |
| 443 | Mesozooplankton  | (28) | <i>Calanus plumchrus</i>          | 5.00  | 1.44E+08 | 1.44E+09 | 3.21E-04 |
| 444 | Mesozooplankton  | (28) | <i>Calanus plumchrus</i>          | 5.00  | 2.61E+08 | 2.62E+09 | 5.14E-04 |
| 445 | Mesozooplankton  | (28) | <i>Calanus plumchrus</i>          | 5.00  | 2.94E+08 | 2.94E+09 | 6.75E-04 |
| 446 | Mesozooplankton  | (28) | <i>Calanus plumchrus</i>          | 7.00  | 3.78E+08 | 3.80E+09 | 6.00E-04 |
| 447 | Mesozooplankton  | (28) | <i>Calanus plumchrus</i>          | 9.35  | 5.38E+08 | 5.40E+09 | 9.86E-04 |
| 448 | Mesozooplankton  | (28) | <i>Calanus plumchrus</i>          | 10.15 | 4.86E+08 | 4.88E+09 | 8.68E-04 |
| 449 | Mesozooplankton  | (28) | <i>Eucalanus bungii bungii</i>    | 6.00  | 5.03E+08 | 5.05E+09 | 9.00E-04 |
| 450 | Mesozooplankton  | (28) | <i>Eucalanus bungii bungii</i>    | 6.00  | 5.03E+08 | 5.05E+09 | 8.04E-04 |
| 451 | Mesozooplankton  | (28) | <i>Pseudocalanus elongatus</i>    | 6.75  | 6.73E+06 | 6.75E+07 | 4.18E-05 |
| 452 | Mesozooplankton  | (28) | <i>Pseudocalanus elongatus</i>    | 6.75  | 6.63E+06 | 6.65E+07 | 3.54E-05 |
| 453 | Mesozooplankton  | (28) | <i>Pseudocalanus elongatus</i>    | 12.20 | 4.04E+06 | 4.05E+07 | 5.04E-05 |

|     |                 |      |                              |       |          |          |          |
|-----|-----------------|------|------------------------------|-------|----------|----------|----------|
| 454 | Mesozooplankton | (28) | <i>Metridia pacifica</i>     | 6.90  | 1.52E+07 | 1.52E+08 | 6.75E-05 |
| 455 | Mesozooplankton | (28) | <i>Metridia pacifica</i>     | 5.00  | 8.52E+07 | 8.55E+08 | 3.00E-04 |
| 456 | Mesozooplankton | (28) | <i>Metridia pacifica</i>     | 9.35  | 7.43E+07 | 7.45E+08 | 6.75E-04 |
| 457 | Mesozooplankton | (28) | <i>Metridia pacifica</i>     | 9.35  | 7.98E+07 | 8.00E+08 | 4.82E-04 |
| 458 | Mesozooplankton | (28) | <i>Metridia pacifica</i>     | 9.10  | 9.37E+07 | 9.40E+08 | 4.61E-04 |
| 459 | Mesozooplankton | (28) | <i>Metridia pacifica</i>     | 9.10  | 9.32E+07 | 9.35E+08 | 4.71E-04 |
| 460 | Mesozooplankton | (28) | <i>Acartia longiremis</i>    | 7.25  | 4.29E+06 | 4.30E+07 | 3.43E-05 |
| 461 | Mesozooplankton | (28) | <i>Acartia longiremis</i>    | 7.25  | 4.09E+06 | 4.10E+07 | 2.57E-05 |
| 462 | Mesozooplankton | (28) | <i>Acartia longiremis</i>    | 7.25  | 3.79E+06 | 3.80E+07 | 2.68E-05 |
| 463 | Mesozooplankton | (28) | <i>Acartia longiremis</i>    | 9.00  | 5.03E+06 | 5.05E+07 | 4.29E-05 |
| 464 | Mesozooplankton | (28) | <i>Acartia longiremis</i>    | 9.00  | 5.18E+06 | 5.20E+07 | 3.64E-05 |
| 465 | Mesozooplankton | (28) | <i>Acartia longiremis</i>    | 9.95  | 4.39E+06 | 4.40E+07 | 3.86E-05 |
| 466 | Mesozooplankton | (28) | <i>Acartia longiremis</i>    | 9.70  | 3.39E+06 | 3.40E+07 | 2.04E-05 |
| 467 | Mesozooplankton | (28) | <i>Acartia longiremis</i>    | 9.70  | 3.39E+06 | 3.40E+07 | 1.82E-05 |
| 468 | Mesozooplankton | (28) | <i>Acartia longiremis</i>    | 9.70  | 3.49E+06 | 3.50E+07 | 2.04E-05 |
| 469 | Mesozooplankton | (28) | <i>Acartia longiremis</i>    | 13.05 | 3.79E+06 | 3.80E+07 | 3.11E-05 |
| 470 | Mesozooplankton | (28) | <i>Acartia longiremis</i>    | 13.05 | 3.64E+06 | 3.65E+07 | 3.54E-05 |
| 471 | Mesozooplankton | (28) | <i>Tortanus discaudatus</i>  | 7.00  | 2.24E+07 | 2.24E+08 | 1.18E-04 |
| 472 | Mesozooplankton | (28) | <i>Tortanus discaudatus</i>  | 7.00  | 3.43E+07 | 3.44E+08 | 1.39E-04 |
| 473 | Mesozooplankton | (28) | <i>Siriella</i> sp.          | 9.00  | 4.76E+08 | 5.50E+09 | 3.02E-03 |
| 474 | Mesozooplankton | (28) | <i>Acanthomysis</i> sp.      | 9.95  | 8.17E+08 | 9.45E+09 | 3.32E-03 |
| 475 | Mesozooplankton | (28) | <i>Leptocuma</i> sp.         | 13.05 | 1.10E+08 | 1.32E+09 | 3.75E-04 |
| 476 | Mesozooplankton | (28) | <i>Diastylis</i> sp.         | 6.90  | 1.63E+09 | 1.96E+10 | 2.15E-03 |
| 477 | Mesozooplankton | (28) | <i>Diastylis</i> sp.         | 6.90  | 2.05E+09 | 2.46E+10 | 3.24E-03 |
| 478 | Mesozooplankton | (28) | <i>Parathemisto japonica</i> | 6.75  | 1.09E+09 | 1.47E+10 | 4.02E-03 |
| 479 | Mesozooplankton | (28) | <i>Parathemisto japonica</i> | 6.75  | 7.21E+08 | 9.70E+09 | 3.61E-03 |
| 480 | Mesozooplankton | (28) | <i>Parathemisto japonica</i> | 9.00  | 1.74E+09 | 2.34E+10 | 7.45E-03 |
| 481 | Mesozooplankton | (28) | <i>Parathemisto japonica</i> | 9.00  | 1.70E+09 | 2.28E+10 | 6.95E-03 |
| 482 | Mesozooplankton | (28) | <i>Parathemisto japonica</i> | 9.00  | 2.14E+09 | 2.88E+10 | 8.11E-03 |
| 483 | Mesozooplankton | (28) | <i>Parathemisto japonica</i> | 9.00  | 1.30E+09 | 1.76E+10 | 7.45E-03 |
| 484 | Mesozooplankton | (28) | <i>Parathemisto japonica</i> | 9.00  | 8.32E+08 | 1.12E+10 | 3.44E-03 |
| 485 | Mesozooplankton | (28) | <i>Pleustes panopla</i>      | 9.80  | 7.80E+07 | 1.05E+09 | 2.14E-04 |
| 486 | Mesozooplankton | (28) | <i>Pontogeneia</i> sp.       | 9.80  | 7.50E+07 | 1.01E+09 | 2.68E-04 |
| 487 | Mesozooplankton | (28) | <i>Cyrtopia</i> larva        | 6.90  | 1.29E+08 | 1.50E+09 | 3.21E-04 |
| 488 | Mesozooplankton | (28) | <i>Cyrtopia</i> larva        | 13.05 | 5.10E+07 | 5.90E+08 | 5.68E-04 |
| 489 | Mesozooplankton | (28) | <i>Cyrtopia</i> larva        | 13.05 | 4.41E+07 | 5.10E+08 | 4.93E-04 |
| 490 | Mesozooplankton | (28) | <i>Euphausia pacifica</i>    | 7.00  | 3.36E+09 | 3.89E+10 | 7.19E-03 |
| 491 | Mesozooplankton | (28) | <i>Euphausia pacifica</i>    | 10.15 | 7.18E+09 | 8.30E+10 | 1.85E-02 |

|     |                 |      |                                     |       |          |          |          |
|-----|-----------------|------|-------------------------------------|-------|----------|----------|----------|
| 492 | Mesozooplankton | (28) | <i>Euphausia pacifica</i>           | 10.15 | 5.75E+09 | 6.65E+10 | 1.69E-02 |
| 493 | Mesozooplankton | (28) | <i>Euphausia pacifica</i>           | 10.15 | 3.87E+09 | 4.47E+10 | 1.64E-02 |
| 494 | Mesozooplankton | (28) | <i>Thysanoessa longipes</i>         | 12.20 | 4.09E+09 | 4.72E+10 | 1.71E-02 |
| 495 | Mesozooplankton | (28) | Macruran decapodid larva            | 7.00  | 1.74E+08 | 2.10E+09 | 4.82E-04 |
| 496 | Mesozooplankton | (28) | <i>Eualus gracilirostris</i>        | 6.75  | 6.20E+09 | 7.48E+10 | 7.17E-03 |
| 497 | Mesozooplankton | (28) | <i>Sagitta elegans</i>              | 6.00  | 5.95E+08 | 8.35E+10 | 1.61E-03 |
| 498 | Mesozooplankton | (28) | <i>Sagitta elegans</i>              | 6.00  | 6.60E+08 | 9.25E+10 | 1.81E-03 |
| 499 | Mesozooplankton | (28) | <i>Sagitta elegans</i>              | 7.00  | 4.85E+08 | 6.80E+10 | 1.30E-03 |
| 500 | Mesozooplankton | (28) | <i>Sagitta elegans</i>              | 12.25 | 7.52E+07 | 1.06E+10 | 5.57E-04 |
| 501 | Mesozooplankton | (28) | <i>Sagitta elegans</i>              | 12.25 | 2.99E+07 | 4.20E+09 | 3.00E-04 |
| 502 | Mesozooplankton | (28) | Macruran mysis larva                | 15.40 | 2.75E+07 | 3.32E+08 | 2.46E-04 |
| 503 | Mesozooplankton | (28) | Brachyuran zoea larva               | 15.40 | 1.04E+07 | 1.25E+08 | 9.86E-05 |
| 504 | Mesozooplankton | (28) | <i>Sagitta minima</i>               | 15.50 | 1.44E+07 | 2.02E+08 | 2.04E-04 |
| 505 | Mesozooplankton | (28) | <i>Oikopleura dioica</i>            | 15.50 | 3.62E+06 | 5.45E+08 | 1.05E-04 |
| 506 | Mesozooplankton | (28) | <i>Oikopleura dioica</i>            | 15.80 | 1.39E+07 | 2.09E+09 | 2.14E-04 |
| 507 | Mesozooplankton | (28) | <i>Beroe cucumia</i>                | 15.15 | 5.53E+09 | 1.66E+12 | 1.48E-02 |
| 508 | Mesozooplankton | (28) | <i>Beroe cucumia</i>                | 15.15 | 8.67E+09 | 2.60E+12 | 1.55E-02 |
| 509 | Mesozooplankton | (28) | <i>Beroe cucumia</i>                | 15.15 | 1.18E+10 | 3.56E+12 | 2.06E-02 |
| 510 | Mesozooplankton | (28) | <i>Calanus plumchrus</i>            | 14.15 | 1.57E+08 | 1.57E+09 | 4.93E-04 |
| 511 | Mesozooplankton | (28) | <i>Calanus plumchrus</i>            | 14.15 | 1.64E+08 | 1.64E+09 | 5.36E-04 |
| 512 | Mesozooplankton | (28) | <i>Calanus plumchrus</i>            | 15.90 | 1.29E+08 | 1.29E+09 | 6.21E-04 |
| 513 | Mesozooplankton | (28) | <i>Acartia clausi</i>               | 15.90 | 1.38E+08 | 1.38E+09 | 7.29E-04 |
| 514 | Mesozooplankton | (28) | <i>Acartia clausi</i>               | 14.15 | 3.14E+06 | 3.15E+07 | 1.39E-05 |
| 515 | Mesozooplankton | (28) | <i>Acartia clausi</i>               | 12.65 | 3.19E+06 | 3.20E+07 | 3.21E-05 |
| 516 | Mesozooplankton | (28) | <i>Acartia clausi</i>               | 15.35 | 5.18E+06 | 5.20E+07 | 3.75E-05 |
| 517 | Mesozooplankton | (28) | <i>Acartia clausi</i>               | 15.35 | 5.38E+06 | 5.40E+07 | 4.71E-05 |
| 518 | Mesozooplankton | (28) | <i>Acantiomysis pseudomacropsis</i> | 13.40 | 1.04E+09 | 1.20E+10 | 4.77E-03 |
| 519 | Mesozooplankton | (28) | <i>Acantiomysis pseudomacropsis</i> | 13.40 | 1.45E+09 | 1.68E+10 | 4.56E-03 |
| 520 | Mesozooplankton | (28) | <i>Lamprops</i> sp.                 | 15.35 | 3.53E+07 | 4.25E+08 | 1.39E-04 |
| 521 | Mesozooplankton | (28) | <i>Lamprops</i> sp.                 | 15.35 | 4.19E+07 | 5.05E+08 | 1.50E-04 |
| 522 | Mesozooplankton | (28) | <i>Sagitta minima</i>               | 13.40 | 3.07E+07 | 4.30E+09 | 3.64E-04 |
| 523 | Mesozooplankton | (28) | <i>Sagitta minima</i>               | 13.40 | 5.56E+07 | 7.80E+09 | 2.89E-04 |
| 524 | Mesozooplankton | (28) | Scombresocidae sp. juv.             | 15.90 | 3.81E+08 | 5.35E+10 | 2.39E-03 |
| 525 | Mesozooplankton | (28) | Scombresocidae sp. juv.             | 15.90 | 7.09E+10 | 9.95E+12 | 3.98E-03 |
| 526 | Mesozooplankton | (28) | <i>Liriope tetraphylla</i>          | 27.00 | 3.18E+08 | 9.55E+10 | 8.68E-04 |
| 527 | Mesozooplankton | (28) | <i>Liriope tetraphylla</i>          | 26.85 | 4.38E+08 | 1.32E+11 | 1.94E-03 |
| 528 | Mesozooplankton | (28) | <i>Diphyes dispar</i>               | 26.65 | 4.00E+08 | 1.20E+11 | 1.31E-03 |
| 529 | Mesozooplankton | (28) | <i>Diphyes</i> sp.                  | 27.00 | 5.08E+08 | 1.52E+11 | 2.59E-03 |

|     |                 |      |                               |       |          |          |          |
|-----|-----------------|------|-------------------------------|-------|----------|----------|----------|
| 530 | Mesozooplankton | (28) | <i>Abyla leuckarti</i> ?      | 27.45 | 2.53E+08 | 7.60E+10 | 9.11E-04 |
| 531 | Mesozooplankton | (28) | <i>Crystallomia</i> sp.       | 26.85 | 3.34E+09 | 1.00E+12 | 1.20E-02 |
| 532 | Mesozooplankton | (28) | <i>Euclio cuspidate</i>       | 22.35 | 8.19E+09 | 1.50E+12 | 4.72E-02 |
| 533 | Mesozooplankton | (28) | <i>Cavolinia globulosa</i>    | 27.40 | 3.91E+09 | 7.17E+11 | 1.09E-02 |
| 534 | Mesozooplankton | (28) | <i>Cavolinia globulosa</i>    | 22.40 | 5.09E+09 | 9.32E+11 | 1.98E-02 |
| 535 | Mesozooplankton | (28) | <i>Cavolinia uncinata</i>     | 19.70 | 5.05E+09 | 9.25E+11 | 1.25E-02 |
| 536 | Mesozooplankton | (28) | <i>Hydromyles globulosa</i>   | 27.40 | 8.11E+08 | 1.48E+11 | 2.02E-03 |
| 537 | Mesozooplankton | (28) | <i>Hydromyles globulosa</i>   | 27.40 | 1.02E+09 | 1.88E+11 | 2.20E-03 |
| 538 | Mesozooplankton | (28) | <i>Calanus minor</i>          | 26.85 | 1.90E+07 | 1.90E+08 | 2.14E-04 |
| 539 | Mesozooplankton | (28) | <i>Calanus minor</i>          | 26.85 | 2.05E+07 | 2.06E+08 | 2.36E-04 |
| 540 | Mesozooplankton | (28) | <i>Calanus minor</i>          | 26.85 | 2.04E+07 | 2.04E+08 | 2.25E-04 |
| 541 | Mesozooplankton | (28) | <i>Neocalanus gracilis</i>    | 27.80 | 9.72E+07 | 9.75E+08 | 1.46E-03 |
| 542 | Mesozooplankton | (28) | <i>Neocalanus gracilis</i>    | 19.70 | 2.49E+08 | 2.50E+09 | 1.81E-03 |
| 543 | Mesozooplankton | (28) | <i>Neocalanus gracilis</i>    | 19.70 | 2.49E+08 | 2.50E+09 | 1.70E-03 |
| 544 | Mesozooplankton | (28) | <i>Neocalanus robustior</i>   | 26.65 | 1.08E+08 | 1.08E+09 | 5.25E-04 |
| 545 | Mesozooplankton | (28) | <i>Undinula darwinii</i>      | 27.80 | 2.58E+07 | 2.58E+08 | 2.04E-04 |
| 546 | Mesozooplankton | (28) | <i>Undinula vulgaris</i>      | 27.80 | 8.28E+07 | 8.30E+08 | 1.25E-03 |
| 547 | Mesozooplankton | (28) | <i>Undinula vulgaris</i>      | 27.80 | 9.37E+07 | 9.40E+08 | 1.18E-03 |
| 548 | Mesozooplankton | (28) | <i>Undinula vulgaris</i>      | 28.50 | 9.37E+07 | 9.40E+08 | 2.31E-03 |
| 549 | Mesozooplankton | (28) | <i>Undinula vulgaris</i>      | 28.50 | 9.12E+07 | 9.15E+08 | 1.86E-03 |
| 550 | Mesozooplankton | (28) | <i>Undinula vulgaris</i>      | 28.50 | 9.57E+07 | 9.60E+08 | 2.76E-03 |
| 551 | Mesozooplankton | (28) | <i>Undinula vulgaris</i>      | 27.35 | 8.18E+07 | 8.20E+08 | 1.14E-03 |
| 552 | Mesozooplankton | (28) | <i>Undinula vulgaris</i>      | 27.00 | 7.08E+07 | 7.10E+08 | 1.59E-03 |
| 553 | Mesozooplankton | (28) | <i>Undinula vulgaris</i>      | 26.40 | 7.13E+07 | 7.15E+08 | 6.86E-04 |
| 554 | Mesozooplankton | (28) | <i>Undinula vulgaris</i>      | 26.40 | 7.58E+07 | 7.60E+08 | 7.07E-04 |
| 555 | Mesozooplankton | (28) | <i>Eucalanus attenuatus</i>   | 26.65 | 4.41E+07 | 4.42E+08 | 9.43E-04 |
| 556 | Mesozooplankton | (28) | <i>Eucalanus attenuatus</i>   | 27.80 | 6.43E+07 | 6.45E+08 | 9.00E-04 |
| 557 | Mesozooplankton | (28) | <i>Eucalanus attenuatus</i>   | 27.80 | 6.53E+07 | 6.55E+08 | 1.04E-03 |
| 558 | Mesozooplankton | (28) | <i>Eucalanus attenuatus</i>   | 27.35 | 1.00E+08 | 1.00E+09 | 9.96E-04 |
| 559 | Mesozooplankton | (28) | <i>Euchaeta flava</i>         | 27.35 | 8.67E+07 | 8.70E+08 | 1.12E-03 |
| 560 | Mesozooplankton | (28) | <i>Centropagea brachiatus</i> | 17.30 | 1.01E+07 | 1.02E+08 | 1.29E-04 |
| 561 | Mesozooplankton | (28) | <i>Pleurvmamma robusta</i> –  | 17.30 | 9.57E+06 | 9.60E+07 | 1.18E-04 |
| 562 | Mesozooplankton | (28) | <i>Candacia aethiopica</i>    | 27.80 | 2.46E+07 | 2.47E+08 | 6.54E-04 |
| 563 | Mesozooplankton | (28) | <i>Labidocera acuta</i>       | 27.00 | 5.13E+07 | 5.15E+08 | 1.15E-03 |
| 564 | Mesozooplankton | (28) | <i>Labidocera acuta</i>       | 28.50 | 1.11E+08 | 1.12E+09 | 2.05E-03 |
| 565 | Mesozooplankton | (28) | <i>Labidocera nerii</i>       | 28.50 | 1.20E+08 | 1.20E+09 | 2.39E-03 |
| 566 | Mesozooplankton | (28) | <i>Labidocera nerii</i>       | 26.40 | 1.07E+08 | 1.07E+09 | 9.11E-04 |
| 567 | Mesozooplankton | (28) | <i>Pontella danae</i>         | 26.40 | 1.14E+08 | 1.14E+09 | 2.34E-03 |

|     |                 |      |                                |       |          |          |          |
|-----|-----------------|------|--------------------------------|-------|----------|----------|----------|
| 568 | Mesozooplankton | (28) | <i>Pontella danae</i>          | 26.40 | 2.90E+08 | 2.91E+09 | 3.36E-03 |
| 569 | Mesozooplankton | (28) | <i>Pontella danae</i>          | 26.40 | 4.08E+08 | 4.09E+09 | 3.99E-03 |
| 570 | Mesozooplankton | (28) | <i>Siriella thompsoni</i>      | 27.75 | 7.01E+08 | 8.10E+09 | 1.01E-02 |
| 571 | Mesozooplankton | (28) | <i>Siriella thompsoni</i>      | 27.75 | 5.67E+08 | 6.55E+09 | 5.87E-03 |
| 572 | Mesozooplankton | (28) | <i>Scina cornigera</i>         | 22.35 | 1.11E+09 | 1.49E+10 | 5.40E-03 |
| 573 | Mesozooplankton | (28) | <i>Vibilia</i> sp.             | 22.35 | 1.11E+09 | 1.50E+10 | 6.39E-03 |
| 574 | Mesozooplankton | (28) | <i>Vibilia</i> sp.             | 27.75 | 4.68E+08 | 6.30E+09 | 7.23E-03 |
| 575 | Mesozooplankton | (28) | <i>Phronima sedentaria</i>     | 27.75 | 4.53E+08 | 6.10E+09 | 4.93E-03 |
| 576 | Mesozooplankton | (28) | <i>Phronima sedentaria</i>     | 27.35 | 2.55E+09 | 3.43E+10 | 2.24E-02 |
| 577 | Mesozooplankton | (28) | <i>Phronima sedentaria</i>     | 27.35 | 4.49E+09 | 6.04E+10 | 4.70E-02 |
| 578 | Mesozooplankton | (28) | <i>Phronima sedentaria</i>     | 19.70 | 2.71E+09 | 3.65E+10 | 1.05E-02 |
| 579 | Mesozooplankton | (28) | <i>Hemityphis tenuimanus</i>   | 19.70 | 2.70E+09 | 3.64E+10 | 1.10E-02 |
| 580 | Mesozooplankton | (28) | <i>Hemityphis tenuimanus</i>   | 26.40 | 6.06E+08 | 8.15E+09 | 3.65E-03 |
| 581 | Mesozooplankton | (28) | <i>Thamneus platyrrhynchus</i> | 26.40 | 5.94E+08 | 8.00E+09 | 3.27E-03 |
| 582 | Mesozooplankton | (28) | <i>Thamneus platyrrhynchus</i> | 27.35 | 1.03E+09 | 1.39E+10 | 1.47E-02 |
| 583 | Mesozooplankton | (28) | <i>Oxycephalus porcdlus</i>    | 27.35 | 7.80E+08 | 1.05E+10 | 6.98E-03 |
| 584 | Mesozooplankton | (28) | <i>Oxycephalus porcdlus</i>    | 27.35 | 6.56E+09 | 8.84E+10 | 4.39E-02 |
| 585 | Mesozooplankton | (28) | <i>Cyrtopia</i> larva          | 27.80 | 2.54E+08 | 2.94E+09 | 3.11E-03 |
| 586 | Mesozooplankton | (28) | <i>Euphausia diomedea</i>      | 27.80 | 2.13E+08 | 2.46E+09 | 1.80E-03 |
| 587 | Mesozooplankton | (28) | <i>Euphausia diomedea</i>      | 27.20 | 2.55E+09 | 2.95E+10 | 2.02E-02 |
| 588 | Mesozooplankton | (28) | <i>Euphausia tenera</i>        | 27.20 | 1.41E+09 | 1.64E+10 | 1.34E-02 |
| 589 | Mesozooplankton | (28) | <i>Euphausia tenera</i>        | 27.35 | 6.31E+08 | 7.30E+09 | 7.03E-03 |
| 590 | Mesozooplankton | (28) | <i>Euphausia tenera</i>        | 27.35 | 2.63E+08 | 3.04E+09 | 2.45E-03 |
| 591 | Mesozooplankton | (28) | <i>Euphausia tenera</i>        | 27.45 | 1.65E+08 | 1.91E+09 | 1.79E-03 |
| 592 | Mesozooplankton | (28) | <i>Euphausia tenera</i>        | 27.45 | 9.95E+07 | 1.15E+09 | 1.21E-03 |
| 593 | Mesozooplankton | (28) | <i>Euphausia tenera</i>        | 27.45 | 1.20E+08 | 1.39E+09 | 8.57E-04 |
| 594 | Mesozooplankton | (28) | <i>Euphausia tenera</i>        | 27.00 | 4.89E+08 | 5.65E+09 | 6.20E-03 |
| 595 | Mesozooplankton | (28) | <i>Euphausia tenera</i>        | 27.00 | 6.49E+08 | 7.50E+09 | 8.00E-03 |
| 596 | Mesozooplankton | (28) | <i>Euphausia tenera</i>        | 26.85 | 2.57E+08 | 2.98E+09 | 2.45E-03 |
| 597 | Mesozooplankton | (28) | <i>Euphausia distinguenda</i>  | 26.85 | 3.24E+08 | 3.74E+09 | 2.75E-03 |
| 598 | Mesozooplankton | (28) | <i>Euphausia distinguenda</i>  | 25.70 | 1.00E+09 | 1.16E+10 | 5.79E-03 |
| 599 | Mesozooplankton | (28) | <i>Euphausia krohnii</i> juv.  | 25.70 | 6.27E+08 | 7.25E+09 | 6.10E-03 |
| 600 | Mesozooplankton | (28) | <i>Euphausia krohnii</i> juv.  | 19.70 | 1.19E+08 | 1.37E+09 | 1.44E-03 |
| 601 | Mesozooplankton | (28) | <i>Euphausia krohnii</i> juv.  | 19.70 | 1.30E+08 | 1.50E+09 | 1.68E-03 |
| 602 | Mesozooplankton | (28) | <i>Phyllosoma</i> larva        | 27.75 | 3.80E+10 | 4.57E+11 | 4.19E-02 |
| 603 | Mesozooplankton | (28) | <i>Puerulus</i> larva          | 27.20 | 2.10E+10 | 2.53E+11 | 3.77E-02 |
| 604 | Mesozooplankton | (28) | <i>Megalopa</i> larva A        | 27.75 | 1.08E+09 | 1.30E+10 | 2.26E-03 |
| 605 | Mesozooplankton | (28) | <i>Megalopa</i> larva B        | 27.75 | 1.10E+09 | 1.33E+10 | 2.87E-03 |



|     |                 |      |                         |       |          |          |          |
|-----|-----------------|------|-------------------------|-------|----------|----------|----------|
| 606 | Mesozooplankton | (28) | Megalopa larva B        | 26.40 | 2.28E+09 | 2.75E+10 | 1.12E-02 |
| 607 | Mesozooplankton | (28) | Megalopa larva C        | 26.40 | 3.39E+09 | 4.08E+10 | 6.55E-03 |
| 608 | Mesozooplankton | (28) | Megalopa larva C        | 26.40 | 3.04E+09 | 3.66E+10 | 6.62E-03 |
| 609 | Mesozooplankton | (28) | Portunidae sp.          | 27.80 | 6.35E+08 | 7.65E+09 | 5.39E-03 |
| 610 | Mesozooplankton | (28) | Portunidae sp.          | 27.80 | 6.68E+08 | 8.05E+09 | 3.84E-03 |
| 611 | Mesozooplankton | (28) | Sagitta enfiata         | 27.35 | 2.11E+08 | 2.96E+10 | 9.86E-04 |
| 612 | Mesozooplankton | (28) | Sagitta bipunctata      | 27.45 | 1.43E+08 | 2.00E+10 | 3.40E-03 |
| 613 | Mesozooplankton | (28) | Sagitta robusta         | 27.45 | 1.79E+08 | 2.51E+10 | 2.21E-03 |
| 614 | Mesozooplankton | (28) | Sagitta robusta         | 27.35 | 3.96E+08 | 5.55E+10 | 5.65E-03 |
| 615 | Mesozooplankton | (28) | Sagitta serratodentata  | 27.40 | 1.39E+08 | 1.96E+10 | 4.38E-03 |
| 616 | Mesozooplankton | (28) | Sagitta serratodentata  | 27.40 | 3.21E+08 | 4.50E+10 | 5.20E-03 |
| 617 | Mesozooplankton | (28) | Sagitta serratodentata  | 27.40 | 2.02E+08 | 2.83E+10 | 3.31E-03 |
| 618 | Mesozooplankton | (28) | Iasis zonaria chain     | 27.00 | 1.64E+09 | 2.47E+11 | 7.79E-03 |
| 619 | Mesozooplankton | (28) | Thalia democratica sol. | 17.30 | 1.00E+09 | 1.50E+11 | 2.27E-03 |
| 620 | Mesozooplankton | (28) | Thalia democratica sol. | 17.30 | 1.28E+09 | 1.93E+11 | 2.20E-03 |
| 621 | Mesozooplankton | (28) | Pegea confoederata sol. | 17.30 | 6.78E+08 | 1.02E+11 | 1.21E-03 |
| 622 | Mesozooplankton | (28) | Pegea confoederata sol. | 25.70 | 2.88E+10 | 4.33E+12 | 3.45E-02 |
| 623 | Mesozooplankton | (28) | Pegea confoederata sol. | 25.70 | 1.40E+10 | 2.10E+12 | 2.60E-02 |
| 624 | Mesozooplankton | (28) | Salpa fusiformis chain  | 27.40 | 3.90E+10 | 5.86E+12 | 3.73E-02 |
| 625 | Mesozooplankton | (28) | Salpa fusiformis chain  | 27.40 | 1.89E+09 | 2.84E+11 | 1.49E-02 |
| 626 | Mesozooplankton | (28) | Salpa fusiformis chain  | 27.40 | 2.14E+09 | 3.22E+11 | 7.62E-03 |
| 627 | Mesozooplankton | (28) | Salpa fusiformis sol.   | 27.40 | 6.35E+08 | 9.55E+10 | 6.19E-03 |
| 628 | Mesozooplankton | (28) | Salpa fusiformis sol.   | 17.30 | 1.81E+09 | 2.72E+11 | 1.58E-02 |
| 629 | Mesozooplankton | (28) | Pyrosoma verticillatum  | 17.30 | 4.32E+09 | 6.50E+11 | 4.33E-03 |
| 630 | Mesozooplankton | (28) | Pyrosoma verticillatum  | 25.70 | 3.41E+09 | 5.14E+11 | 5.75E-03 |
| 631 | Mesozooplankton | (28) | Pyrosoma verticillatum  | 25.70 | 1.31E+10 | 1.97E+12 | 1.40E-02 |
| 632 | Mesozooplankton | (29) | Calanus                 | -1.00 | 5.20E+08 | 5.22E+09 | 1.26E-03 |
| 633 | Mesozooplankton | (29) | Calanoides              | -0.20 | 1.96E+08 | 1.97E+09 | 2.26E-04 |
| 634 | Mesozooplankton | (29) | Calanoides              | -0.50 | 1.09E+08 | 1.09E+09 | 1.39E-04 |
| 635 | Mesozooplankton | (29) | Rhincalanus             | -1.70 | 5.38E+08 | 5.40E+09 | 4.69E-04 |
| 636 | Mesozooplankton | (29) | Metridia                | -1.40 | 1.32E+08 | 1.32E+09 | 3.43E-04 |
| 637 | Mesozooplankton | (29) | Calanus                 | 0.10  | 1.93E+08 | 1.94E+09 | 3.51E-04 |
| 638 | Mesozooplankton | (29) | Calanus glacialis       | 2.30  | 2.36E+08 | 2.37E+09 | 6.60E-04 |
| 639 | Mesozooplankton | (29) | Calanus                 | 1.30  | 1.97E+09 | 1.98E+10 | 1.59E-03 |
| 640 | Mesozooplankton | (29) | Calanus                 | 0.90  | 9.69E+08 | 9.72E+09 | 1.10E-03 |
| 641 | Mesozooplankton | (29) | Calanus                 | -0.30 | 1.33E+09 | 1.34E+10 | 1.13E-03 |
| 642 | Mesozooplankton | (29) | Metridia longa          | 0.10  | 1.76E+08 | 1.76E+09 | 4.35E-04 |
| 643 | Mesozooplankton | (29) | Neocalanus              | 7.30  | 3.91E+08 | 3.92E+09 | 7.29E-04 |

|     |                 |      |                   |       |          |          |          |
|-----|-----------------|------|-------------------|-------|----------|----------|----------|
| 644 | Mesozooplankton | (29) | Neocalanus        | 5.60  | 1.31E+08 | 1.32E+09 | 3.00E-04 |
| 645 | Mesozooplankton | (29) | Neocalanus        | 15.10 | 1.47E+08 | 1.47E+09 | 5.95E-04 |
| 646 | Mesozooplankton | (29) | Neocalanus        | 6.30  | 7.91E+08 | 7.94E+09 | 1.79E-03 |
| 647 | Mesozooplankton | (29) | Mesocalanus       | 15.80 | 1.55E+07 | 1.55E+08 | 2.36E-04 |
| 648 | Mesozooplankton | (29) | Eucalanus bungii  | 6.00  | 5.03E+08 | 5.05E+09 | 8.52E-04 |
| 649 | Mesozooplankton | (29) | Paracalanus       | 13.90 | 1.50E+06 | 1.50E+07 | 3.32E-05 |
| 650 | Mesozooplankton | (29) | Pseudocalanus     | 8.60  | 5.98E+06 | 6.00E+07 | 4.29E-05 |
| 651 | Mesozooplankton | (29) | Centropages       | 15.90 | 8.47E+06 | 8.50E+07 | 9.21E-05 |
| 652 | Mesozooplankton | (29) | Pseudodiaptomus   | 14.30 | 6.98E+06 | 7.00E+07 | 6.00E-05 |
| 653 | Mesozooplankton | (29) | Metridia pacifica | 8.20  | 7.38E+07 | 7.40E+08 | 4.09E-04 |
| 654 | Mesozooplankton | (29) | Metridia pacifica | 13.00 | 4.69E+07 | 4.70E+08 | 2.94E-04 |
| 655 | Mesozooplankton | (29) | Acartia clausi    | 14.80 | 3.99E+06 | 4.00E+07 | 3.32E-05 |
| 656 | Mesozooplankton | (29) | Acartia           | 9.60  | 3.99E+06 | 4.00E+07 | 3.00E-05 |
| 657 | Mesozooplankton | (29) | Tortanus          | 7.00  | 2.84E+07 | 2.85E+08 | 1.29E-04 |
| 658 | Mesozooplankton | (29) | Neocalanus        | 19.70 | 2.49E+08 | 2.50E+09 | 1.76E-03 |
| 659 | Mesozooplankton | (29) | Undinula          | 23.50 | 9.22E+07 | 9.25E+08 | 1.03E-03 |
| 660 | Mesozooplankton | (29) | Euchaeta marina   | 24.00 | 1.45E+08 | 1.46E+09 | 1.43E-03 |
| 661 | Mesozooplankton | (29) | Centropages       | 17.30 | 9.97E+06 | 1.00E+08 | 1.23E-04 |
| 662 | Mesozooplankton | (29) | Acartia tonsa     | 22.00 | 3.49E+06 | 3.50E+07 | 6.00E-05 |
| 663 | Mesozooplankton | (29) | Nannocalanus      | 26.90 | 1.99E+07 | 2.00E+08 | 2.25E-04 |
| 664 | Mesozooplankton | (29) | Undinulla         | 27.60 | 8.32E+07 | 8.35E+08 | 1.50E-03 |
| 665 | Mesozooplankton | (29) | Eucalanus         | 24.00 | 5.18E+07 | 5.20E+08 | 7.02E-04 |
| 666 | Mesozooplankton | (29) | Eucalanus         | 27.40 | 6.83E+07 | 6.85E+08 | 9.70E-04 |
| 667 | Mesozooplankton | (29) | Calanopia         | 26.00 | 2.79E+07 | 2.80E+08 | 3.00E-04 |
| 668 | Mesozooplankton | (29) | Labidocera acuta  | 24.00 | 1.16E+08 | 1.16E+09 | 2.02E-03 |
| 669 | Mesozooplankton | (29) | Labidocera acuta  | 28.50 | 1.14E+08 | 1.14E+09 | 2.22E-03 |
| 670 | Mesozooplankton | (29) | Labidocera nerii  | 26.40 | 1.10E+08 | 1.10E+09 | 1.62E-03 |
| 671 | Mesozooplankton | (29) | Pontella danae    | 26.40 | 3.49E+08 | 3.50E+09 | 3.67E-03 |
| 672 | Mesozooplankton | (29) | Acartia australis | 25.00 | 4.49E+06 | 4.50E+07 | 5.89E-05 |
| 673 | Mesozooplankton | (29) | Acartia pacifica  | 26.00 | 3.49E+06 | 3.50E+07 | 4.93E-05 |
| 674 | Mesozooplankton | (29) | Tortanus gracilis | 26.00 | 1.20E+07 | 1.20E+08 | 1.53E-04 |
| 675 | Mesozooplankton | (30) | Oikopleura dioica | 15.00 | 1.14E+05 | 1.72E+07 | 2.16E-05 |
| 676 | Mesozooplankton | (30) | Oikopleura dioica | 15.00 | 1.14E+05 | 1.72E+07 | 2.96E-05 |
| 677 | Mesozooplankton | (30) | Oikopleura dioica | 15.00 | 2.96E+05 | 4.45E+07 | 2.45E-05 |
| 678 | Mesozooplankton | (30) | Oikopleura dioica | 15.00 | 2.96E+05 | 4.45E+07 | 2.76E-05 |
| 679 | Mesozooplankton | (30) | Oikopleura dioica | 15.00 | 4.37E+05 | 6.57E+07 | 6.63E-05 |
| 680 | Mesozooplankton | (30) | Oikopleura dioica | 15.00 | 7.61E+05 | 1.15E+08 | 3.89E-05 |
| 681 | Mesozooplankton | (30) | Oikopleura dioica | 15.00 | 7.66E+05 | 1.15E+08 | 5.62E-05 |

|     |                 |      |                   |       |          |          |          |
|-----|-----------------|------|-------------------|-------|----------|----------|----------|
| 682 | Mesozooplankton | (30) | Oikopleura dioica | 15.00 | 8.68E+05 | 1.31E+08 | 6.61E-05 |
| 683 | Mesozooplankton | (30) | Oikopleura dioica | 15.00 | 1.30E+06 | 1.96E+08 | 7.03E-05 |
| 684 | Mesozooplankton | (30) | Oikopleura dioica | 15.00 | 2.20E+06 | 3.31E+08 | 8.61E-05 |
| 685 | Mesozooplankton | (30) | Oikopleura dioica | 15.00 | 2.21E+06 | 3.32E+08 | 8.94E-05 |
| 686 | Mesozooplankton | (30) | Oikopleura dioica | 15.00 | 2.43E+06 | 3.66E+08 | 1.07E-04 |
| 687 | Mesozooplankton | (30) | Oikopleura dioica | 15.00 | 3.21E+06 | 4.82E+08 | 1.59E-04 |
| 688 | Mesozooplankton | (30) | Oikopleura dioica | 15.00 | 3.22E+06 | 4.84E+08 | 1.65E-04 |
| 689 | Mesozooplankton | (30) | Oikopleura dioica | 15.00 | 3.48E+06 | 5.24E+08 | 1.65E-04 |
| 690 | Mesozooplankton | (30) | Oikopleura dioica | 15.00 | 3.49E+06 | 5.25E+08 | 1.69E-04 |
| 691 | Mesozooplankton | (30) | Oikopleura dioica | 15.00 | 3.43E+06 | 5.16E+08 | 1.28E-04 |
| 692 | Mesozooplankton | (30) | Oikopleura dioica | 15.00 | 5.67E+06 | 8.53E+08 | 1.49E-04 |
| 693 | Mesozooplankton | (30) | Oikopleura dioica | 15.00 | 5.86E+06 | 8.82E+08 | 2.02E-04 |
| 694 | Mesozooplankton | (30) | Oikopleura dioica | 15.00 | 7.12E+06 | 1.07E+09 | 2.10E-04 |
| 695 | Mesozooplankton | (30) | Oikopleura dioica | 15.00 | 6.95E+06 | 1.04E+09 | 1.76E-04 |
| 696 | Mesozooplankton | (30) | Oikopleura dioica | 24.00 | 1.47E+05 | 2.21E+07 | 2.83E-05 |
| 697 | Mesozooplankton | (30) | Oikopleura dioica | 24.00 | 1.86E+05 | 2.79E+07 | 5.39E-05 |
| 698 | Mesozooplankton | (30) | Oikopleura dioica | 24.00 | 4.43E+05 | 6.66E+07 | 1.13E-04 |
| 699 | Mesozooplankton | (30) | Oikopleura dioica | 24.00 | 4.78E+05 | 7.18E+07 | 9.38E-05 |
| 700 | Mesozooplankton | (30) | Oikopleura dioica | 24.00 | 7.27E+05 | 1.09E+08 | 1.03E-04 |
| 701 | Mesozooplankton | (30) | Oikopleura dioica | 24.00 | 8.42E+05 | 1.27E+08 | 1.37E-04 |
| 702 | Mesozooplankton | (30) | Oikopleura dioica | 24.00 | 1.36E+06 | 2.05E+08 | 1.43E-04 |
| 703 | Mesozooplankton | (30) | Oikopleura dioica | 24.00 | 1.37E+06 | 2.05E+08 | 1.50E-04 |
| 704 | Mesozooplankton | (30) | Oikopleura dioica | 24.00 | 1.72E+06 | 2.58E+08 | 1.49E-04 |
| 705 | Mesozooplankton | (30) | Oikopleura dioica | 24.00 | 2.82E+06 | 4.24E+08 | 1.82E-04 |
| 706 | Mesozooplankton | (30) | Oikopleura dioica | 24.00 | 2.81E+06 | 4.22E+08 | 2.08E-04 |
| 707 | Mesozooplankton | (30) | Oikopleura dioica | 24.00 | 2.93E+06 | 4.40E+08 | 2.77E-04 |
| 708 | Mesozooplankton | (30) | Oikopleura dioica | 24.00 | 3.37E+06 | 5.06E+08 | 2.44E-04 |
| 709 | Mesozooplankton | (30) | Oikopleura dioica | 24.00 | 3.74E+06 | 5.63E+08 | 3.09E-04 |
| 710 | Mesozooplankton | (30) | Oikopleura dioica | 24.00 | 4.28E+06 | 6.44E+08 | 3.22E-04 |
| 711 | Mesozooplankton | (30) | Oikopleura dioica | 24.00 | 4.66E+06 | 7.01E+08 | 2.87E-04 |
| 712 | Mesozooplankton | (30) | Oikopleura dioica | 24.00 | 4.72E+06 | 7.10E+08 | 3.20E-04 |
| 713 | Mesozooplankton | (30) | Oikopleura dioica | 24.00 | 5.51E+06 | 8.28E+08 | 3.21E-04 |
| 714 | Mesozooplankton | (30) | Oikopleura dioica | 24.00 | 6.19E+06 | 9.30E+08 | 3.30E-04 |
| 715 | Mesozooplankton | (30) | Oikopleura dioica | 24.00 | 6.22E+06 | 9.36E+08 | 3.44E-04 |
| 716 | Mesozooplankton | (30) | Oikopleura dioica | 24.00 | 6.49E+06 | 9.76E+08 | 3.40E-04 |
| 717 | Mesozooplankton | (30) | Oikopleura dioica | 24.00 | 7.20E+06 | 1.08E+09 | 3.58E-04 |
| 718 | Mesozooplankton | (30) | Oikopleura dioica | 24.00 | 7.25E+06 | 1.09E+09 | 3.74E-04 |
| 719 | Mesozooplankton | (30) | Oikopleura dioica | 24.00 | 8.74E+06 | 1.31E+09 | 3.84E-04 |

|     |                 |      |                       |       |          |          |          |
|-----|-----------------|------|-----------------------|-------|----------|----------|----------|
| 720 | Mesozooplankton | (30) | Oikopleura dioica     | 20.00 | 1.14E+05 | 1.72E+07 | 1.85E-05 |
| 721 | Mesozooplankton | (30) | Oikopleura dioica     | 20.00 | 1.15E+05 | 1.73E+07 | 5.49E-05 |
| 722 | Mesozooplankton | (30) | Oikopleura dioica     | 20.00 | 1.65E+05 | 2.48E+07 | 3.00E-05 |
| 723 | Mesozooplankton | (30) | Oikopleura dioica     | 20.00 | 4.32E+05 | 6.50E+07 | 2.94E-05 |
| 724 | Mesozooplankton | (30) | Oikopleura dioica     | 20.00 | 4.53E+05 | 6.81E+07 | 9.36E-05 |
| 725 | Mesozooplankton | (30) | Oikopleura dioica     | 20.00 | 6.26E+05 | 9.41E+07 | 7.18E-05 |
| 726 | Mesozooplankton | (30) | Oikopleura dioica     | 20.00 | 6.03E+05 | 9.07E+07 | 3.53E-05 |
| 727 | Mesozooplankton | (30) | Oikopleura dioica     | 20.00 | 9.09E+05 | 1.37E+08 | 5.20E-05 |
| 728 | Mesozooplankton | (30) | Oikopleura dioica     | 20.00 | 9.12E+05 | 1.37E+08 | 6.30E-05 |
| 729 | Mesozooplankton | (30) | Oikopleura dioica     | 20.00 | 1.19E+06 | 1.79E+08 | 8.60E-05 |
| 730 | Mesozooplankton | (30) | Oikopleura dioica     | 20.00 | 1.48E+06 | 2.23E+08 | 8.17E-05 |
| 731 | Mesozooplankton | (30) | Oikopleura dioica     | 20.00 | 1.86E+06 | 2.79E+08 | 9.20E-05 |
| 732 | Mesozooplankton | (30) | Oikopleura dioica     | 20.00 | 2.27E+06 | 3.42E+08 | 1.23E-04 |
| 733 | Mesozooplankton | (30) | Oikopleura dioica     | 20.00 | 2.26E+06 | 3.39E+08 | 1.46E-04 |
| 734 | Mesozooplankton | (30) | Oikopleura dioica     | 20.00 | 2.34E+06 | 3.52E+08 | 1.99E-04 |
| 735 | Mesozooplankton | (30) | Oikopleura dioica     | 20.00 | 2.51E+06 | 3.77E+08 | 1.46E-04 |
| 736 | Mesozooplankton | (30) | Oikopleura dioica     | 20.00 | 2.59E+06 | 3.90E+08 | 1.93E-04 |
| 737 | Mesozooplankton | (30) | Oikopleura dioica     | 20.00 | 2.85E+06 | 4.28E+08 | 2.10E-04 |
| 738 | Mesozooplankton | (30) | Oikopleura dioica     | 20.00 | 3.87E+06 | 5.82E+08 | 1.71E-04 |
| 739 | Mesozooplankton | (30) | Oikopleura dioica     | 20.00 | 6.49E+06 | 9.75E+08 | 2.61E-04 |
| 740 | Mesozooplankton | (30) | Oikopleura dioica     | 20.00 | 6.72E+06 | 1.01E+09 | 3.18E-04 |
| 741 | Mesozooplankton | (30) | Oikopleura dioica     | 20.00 | 7.08E+06 | 1.06E+09 | 3.16E-04 |
| 742 | Mesozooplankton | (30) | Oikopleura dioica     | 20.00 | 8.38E+06 | 1.26E+09 | 2.84E-04 |
| 743 | Mesozooplankton | (30) | Oikopleura dioica     | 20.00 | 8.72E+06 | 1.31E+09 | 3.40E-04 |
| 744 | Mesozooplankton | (31) | Oikopleura longicauda | 20.00 | 9.08E+05 | 1.37E+08 | 6.96E-05 |
| 745 | Mesozooplankton | (31) | Oikopleura longicauda | 20.00 | 2.03E+06 | 3.05E+08 | 1.77E-04 |
| 746 | Mesozooplankton | (31) | Oikopleura longicauda | 20.00 | 2.85E+06 | 4.28E+08 | 1.88E-04 |
| 747 | Mesozooplankton | (31) | Oikopleura longicauda | 20.00 | 4.95E+06 | 7.45E+08 | 2.46E-04 |
| 748 | Mesozooplankton | (31) | Oikopleura longicauda | 20.00 | 6.74E+06 | 1.01E+09 | 5.16E-04 |
| 749 | Mesozooplankton | (31) | Oikopleura longicauda | 20.00 | 1.40E+07 | 2.10E+09 | 7.13E-04 |
| 750 | Mesozooplankton | (32) | Aglantha digitale     | 1.10  | 2.33E+09 | 7.00E+11 | 2.43E-03 |
| 751 | Mesozooplankton | (32) | Limacina helicina     | 0.00  | 1.62E+08 | 2.96E+10 | 4.83E-04 |
| 752 | Mesozooplankton | (32) | Clione limacina       | -0.10 | 4.50E+09 | 8.24E+11 | 1.77E-03 |
| 753 | Mesozooplankton | (32) | Calanus finmarchicus  | 0.10  | 1.93E+08 | 1.94E+09 | 3.51E-04 |
| 754 | Mesozooplankton | (32) | Calanus glacialis     | 3.50  | 2.04E+08 | 2.05E+09 | 6.75E-04 |
| 755 | Mesozooplankton | (32) | Calanus glacialis     | -0.50 | 3.30E+08 | 3.31E+09 | 6.24E-04 |
| 756 | Mesozooplankton | (32) | Calanus hyperboreus   | 1.30  | 1.97E+09 | 1.98E+10 | 1.60E-03 |
| 757 | Mesozooplankton | (32) | Calanus hyperboreus   | 0.90  | 9.67E+08 | 9.70E+09 | 1.10E-03 |

|     |                 |      |                                   |       |          |          |          |
|-----|-----------------|------|-----------------------------------|-------|----------|----------|----------|
| 758 | Mesozooplankton | (32) | <i>Calanus hyperboreus</i>        | -0.30 | 1.34E+09 | 1.34E+10 | 1.12E-03 |
| 759 | Mesozooplankton | (32) | <i>Metridia longa</i>             | 0.10  | 1.76E+08 | 1.76E+09 | 4.35E-04 |
| 760 | Mesozooplankton | (32) | <i>Parathemisto libellula</i>     | -0.10 | 1.11E+09 | 1.49E+10 | 2.71E-03 |
| 761 | Mesozooplankton | (32) | <i>Thysanoessa inermis</i>        | 0.10  | 1.98E+09 | 2.28E+10 | 3.42E-03 |
| 762 | Mesozooplankton | (32) | <i>Thysanoessa inermis</i>        | 1.90  | 1.50E+10 | 1.74E+11 | 1.48E-02 |
| 763 | Mesozooplankton | (32) | <i>Sagitta elegans</i>            | -0.30 | 1.60E+09 | 2.25E+10 | 1.51E-03 |
| 764 | Mesozooplankton | (33) | <i>Beroe</i> sp.                  | -1.50 | 1.05E+11 | 3.14E+13 | 1.67E-02 |
| 765 | Mesozooplankton | (33) | <i>Beroe</i> sp.                  | -1.70 | 4.41E+11 | 1.32E+14 | 4.38E-02 |
| 766 | Mesozooplankton | (33) | Metritensiidae sp.                | -1.60 | 1.56E+10 | 4.68E+12 | 1.30E-02 |
| 767 | Mesozooplankton | (33) | <i>Diphyes antarctica</i>         | -1.80 | 6.58E+09 | 1.97E+12 | 1.58E-03 |
| 768 | Mesozooplankton | (33) | <i>cyclosalpa</i>                 | -1.70 | 7.57E+09 | 2.27E+12 | 4.43E-03 |
| 769 | Mesozooplankton | (33) | <i>Diphyes antarctica</i>         | -1.70 | 1.41E+10 | 4.25E+12 | 6.00E-03 |
| 770 | Mesozooplankton | (33) | <i>Antarctomysis maxima</i>       | -1.60 | 7.37E+10 | 8.52E+11 | 3.15E-02 |
| 771 | Mesozooplankton | (33) | <i>Euphausia superba</i>          | -1.80 | 2.02E+10 | 2.33E+11 | 2.83E-02 |
| 772 | Mesozooplankton | (33) | <i>Euphausia superba</i>          | -1.60 | 3.30E+10 | 3.81E+11 | 4.00E-02 |
| 773 | Mesozooplankton | (33) | <i>Euphausia superba</i>          | -1.60 | 5.86E+10 | 6.77E+11 | 7.38E-02 |
| 774 | Mesozooplankton | (33) | <i>Euphausia superba</i>          | -1.60 | 1.05E+11 | 1.21E+12 | 1.28E-01 |
| 775 | Mesozooplankton | (33) | <i>Euphausia superba</i>          | -1.70 | 1.52E+11 | 1.75E+12 | 1.91E-01 |
| 776 | Mesozooplankton | (33) | <i>Euphausia crystallorophias</i> | -1.70 | 7.39E+09 | 8.54E+10 | 9.86E-03 |
| 777 | Mesozooplankton | (33) | <i>Euphausia crystallorophias</i> | -1.70 | 2.03E+10 | 2.35E+11 | 2.67E-02 |
| 778 | Mesozooplankton | (33) | <i>Euphausia crystallorophias</i> | -1.70 | 2.18E+10 | 2.52E+11 | 4.03E-02 |
| 779 | Mesozooplankton | (33) | <i>Chorismus antarcticus</i>      | -1.70 | 2.46E+11 | 2.97E+12 | 5.84E-02 |
| 780 | Mesozooplankton | (33) | <i>Salpa thompsoni</i>            | -1.60 | 1.62E+11 | 2.44E+13 | 5.35E-02 |
| 781 | Mesozooplankton | (33) | <i>Salpa thompsoni</i>            | -1.70 | 4.37E+11 | 6.57E+13 | 1.17E-01 |
| 782 | Mesozooplankton | (34) | <i>Beroe</i> sp.                  | -0.80 | 6.69E+10 | 2.01E+13 | 1.65E-02 |
| 783 | Mesozooplankton | (34) | <i>Limacina antarctica</i>        | -0.90 | 1.76E+09 | 3.22E+11 | 3.45E-03 |
| 784 | Mesozooplankton | (34) | <i>Clione antarctica</i>          | -1.30 | 6.92E+09 | 1.27E+12 | 6.76E-03 |
| 785 | Mesozooplankton | (34) | <i>Cleodora sulcata</i>           | -1.10 | 1.49E+10 | 2.74E+12 | 2.38E-02 |
| 786 | Mesozooplankton | (34) | <i>Calanus propinquus</i>         | -1.00 | 5.18E+08 | 5.20E+09 | 1.26E-03 |
| 787 | Mesozooplankton | (34) | <i>Calanus propinquus</i>         | -1.00 | 4.22E+08 | 4.24E+09 | 7.23E-04 |
| 788 | Mesozooplankton | (34) | <i>Metridia gerlachei</i>         | -1.40 | 1.32E+08 | 1.32E+09 | 3.43E-04 |
| 789 | Mesozooplankton | (34) | <i>Metridia gerlachei</i>         | -1.00 | 1.07E+08 | 1.07E+09 | 2.28E-04 |
| 790 | Mesozooplankton | (34) | <i>Parathemisto gaudichaudii</i>  | -0.80 | 1.34E+09 | 1.80E+10 | 2.85E-03 |
| 791 | Mesozooplankton | (34) | <i>Parathemisto gaudichaudii</i>  | -1.00 | 4.87E+09 | 6.56E+10 | 5.96E-03 |
| 792 | Mesozooplankton | (34) | <i>Viblia antarctica</i>          | -1.10 | 4.51E+09 | 6.07E+10 | 6.50E-03 |
| 793 | Mesozooplankton | (34) | <i>Hyperia gaudichaudii</i>       | -0.80 | 3.91E+10 | 5.26E+11 | 2.39E-02 |
| 794 | Mesozooplankton | (34) | <i>Euphausia superba</i>          | -1.10 | 1.17E+10 | 1.35E+11 | 1.40E-02 |
| 795 | Mesozooplankton | (34) | <i>Euphausia superba</i>          | -1.10 | 3.32E+10 | 3.84E+11 | 3.63E-02 |

|     |                 |      |                            |       |          |          |          |
|-----|-----------------|------|----------------------------|-------|----------|----------|----------|
| 796 | Mesozooplankton | (34) | <i>Euphasia superba</i>    | -1.10 | 6.18E+10 | 7.14E+11 | 6.24E-02 |
| 797 | Mesozooplankton | (34) | <i>Euphasia superba</i>    | -1.10 | 1.03E+11 | 1.19E+12 | 9.71E-02 |
| 798 | Mesozooplankton | (34) | <i>Euphasia superba</i>    | -1.00 | 1.53E+11 | 1.77E+12 | 1.32E-01 |
| 799 | Mesozooplankton | (34) | <i>Euphasia triacantha</i> | -0.80 | 9.93E+09 | 1.15E+11 | 8.95E-03 |
| 800 | Mesozooplankton | (34) | <i>Ihlea recovitzai</i>    | -1.00 | 3.64E+09 | 5.47E+11 | 2.37E-03 |
| 801 | Mesozooplankton | (34) | <i>Salpa thompsoni</i>     | -1.10 | 3.81E+10 | 5.73E+12 | 1.29E-02 |
| 802 | Mesozooplankton | (35) | <i>Parasagitta elegans</i> | -1.25 | 5.21E+07 | 7.31E+09 | 9.52E-05 |
| 803 | Mesozooplankton | (35) | <i>Parasagitta elegans</i> | -1.25 | 5.21E+07 | 7.31E+09 | 4.66E-05 |
| 804 | Mesozooplankton | (35) | <i>Parasagitta elegans</i> | -1.25 | 5.73E+07 | 8.04E+09 | 5.46E-05 |
| 805 | Mesozooplankton | (35) | <i>Parasagitta elegans</i> | -1.25 | 7.62E+07 | 1.07E+10 | 6.40E-05 |
| 806 | Mesozooplankton | (35) | <i>Parasagitta elegans</i> | -1.25 | 7.99E+07 | 1.12E+10 | 6.93E-05 |
| 807 | Mesozooplankton | (35) | <i>Parasagitta elegans</i> | -1.25 | 8.38E+07 | 1.18E+10 | 1.12E-04 |
| 808 | Mesozooplankton | (35) | <i>Parasagitta elegans</i> | -1.25 | 9.21E+07 | 1.29E+10 | 1.12E-04 |
| 809 | Mesozooplankton | (35) | <i>Parasagitta elegans</i> | -1.25 | 9.66E+07 | 1.36E+10 | 1.21E-04 |
| 810 | Mesozooplankton | (35) | <i>Parasagitta elegans</i> | -1.25 | 1.06E+08 | 1.49E+10 | 1.03E-04 |
| 811 | Mesozooplankton | (35) | <i>Parasagitta elegans</i> | -1.25 | 1.11E+08 | 1.56E+10 | 1.12E-04 |
| 812 | Mesozooplankton | (35) | <i>Parasagitta elegans</i> | -1.25 | 1.01E+08 | 1.42E+10 | 8.12E-05 |
| 813 | Mesozooplankton | (35) | <i>Parasagitta elegans</i> | -1.25 | 1.17E+08 | 1.64E+10 | 6.93E-05 |
| 814 | Mesozooplankton | (35) | <i>Parasagitta elegans</i> | -1.25 | 1.35E+08 | 1.89E+10 | 9.52E-05 |
| 815 | Mesozooplankton | (35) | <i>Parasagitta elegans</i> | -1.25 | 1.41E+08 | 1.98E+10 | 1.03E-04 |
| 816 | Mesozooplankton | (35) | <i>Parasagitta elegans</i> | -1.25 | 1.55E+08 | 2.18E+10 | 8.79E-05 |
| 817 | Mesozooplankton | (35) | <i>Parasagitta elegans</i> | -1.25 | 1.28E+08 | 1.80E+10 | 1.31E-04 |
| 818 | Mesozooplankton | (35) | <i>Parasagitta elegans</i> | -1.25 | 1.41E+08 | 1.98E+10 | 1.31E-04 |
| 819 | Mesozooplankton | (35) | <i>Parasagitta elegans</i> | -1.25 | 1.23E+08 | 1.72E+10 | 1.53E-04 |
| 820 | Mesozooplankton | (35) | <i>Parasagitta elegans</i> | -1.25 | 1.11E+08 | 1.56E+10 | 1.66E-04 |
| 821 | Mesozooplankton | (35) | <i>Parasagitta elegans</i> | -1.25 | 1.06E+08 | 1.49E+10 | 2.47E-04 |
| 822 | Mesozooplankton | (35) | <i>Parasagitta elegans</i> | -1.25 | 1.88E+08 | 2.63E+10 | 1.12E-04 |
| 823 | Mesozooplankton | (35) | <i>Parasagitta elegans</i> | -1.25 | 1.63E+08 | 2.28E+10 | 1.21E-04 |
| 824 | Mesozooplankton | (35) | <i>Parasagitta elegans</i> | -1.25 | 1.55E+08 | 2.18E+10 | 2.67E-04 |
| 825 | Mesozooplankton | (35) | <i>Parasagitta elegans</i> | -1.25 | 1.79E+08 | 2.51E+10 | 2.47E-04 |
| 826 | Mesozooplankton | (35) | <i>Parasagitta elegans</i> | -1.25 | 1.48E+08 | 2.08E+10 | 2.11E-04 |
| 827 | Mesozooplankton | (35) | <i>Parasagitta elegans</i> | -1.25 | 1.63E+08 | 2.28E+10 | 1.80E-04 |
| 828 | Mesozooplankton | (35) | <i>Parasagitta elegans</i> | -1.25 | 1.71E+08 | 2.40E+10 | 1.80E-04 |
| 829 | Mesozooplankton | (35) | <i>Parasagitta elegans</i> | -1.25 | 1.71E+08 | 2.40E+10 | 1.66E-04 |
| 830 | Mesozooplankton | (35) | <i>Parasagitta elegans</i> | -1.25 | 1.79E+08 | 2.51E+10 | 1.53E-04 |
| 831 | Mesozooplankton | (35) | <i>Parasagitta elegans</i> | -1.25 | 1.88E+08 | 2.63E+10 | 1.66E-04 |
| 832 | Mesozooplankton | (35) | <i>Parasagitta elegans</i> | -1.25 | 1.97E+08 | 2.76E+10 | 1.53E-04 |
| 833 | Mesozooplankton | (35) | <i>Parasagitta elegans</i> | -1.25 | 2.17E+08 | 3.04E+10 | 1.53E-04 |

|     |                 |      |                     |       |          |          |          |
|-----|-----------------|------|---------------------|-------|----------|----------|----------|
| 834 | Mesozooplankton | (35) | Parasagitta elegans | -1.25 | 2.50E+08 | 3.50E+10 | 1.42E-04 |
| 835 | Mesozooplankton | (35) | Parasagitta elegans | -1.25 | 2.17E+08 | 3.04E+10 | 1.80E-04 |
| 836 | Mesozooplankton | (35) | Parasagitta elegans | -1.25 | 2.07E+08 | 2.90E+10 | 1.80E-04 |
| 837 | Mesozooplankton | (35) | Parasagitta elegans | -1.25 | 2.27E+08 | 3.18E+10 | 2.11E-04 |
| 838 | Mesozooplankton | (35) | Parasagitta elegans | -1.25 | 2.27E+08 | 3.18E+10 | 2.47E-04 |
| 839 | Mesozooplankton | (35) | Parasagitta elegans | -1.25 | 2.88E+08 | 4.04E+10 | 2.11E-04 |
| 840 | Mesozooplankton | (35) | Parasagitta elegans | -1.25 | 3.17E+08 | 4.44E+10 | 2.11E-04 |
| 841 | Mesozooplankton | (35) | Parasagitta elegans | -1.25 | 3.17E+08 | 4.44E+10 | 1.80E-04 |
| 842 | Mesozooplankton | (35) | Parasagitta elegans | -1.25 | 3.02E+08 | 4.23E+10 | 2.28E-04 |
| 843 | Mesozooplankton | (35) | Parasagitta elegans | -1.25 | 2.75E+08 | 3.85E+10 | 4.30E-04 |
| 844 | Mesozooplankton | (35) | Parasagitta elegans | -1.25 | 3.17E+08 | 4.44E+10 | 3.97E-04 |
| 845 | Mesozooplankton | (35) | Parasagitta elegans | -1.25 | 3.83E+08 | 5.37E+10 | 2.67E-04 |
| 846 | Mesozooplankton | (35) | Parasagitta elegans | -1.25 | 4.01E+08 | 5.63E+10 | 2.89E-04 |
| 847 | Mesozooplankton | (35) | Parasagitta elegans | -1.25 | 5.87E+08 | 8.23E+10 | 4.66E-04 |
| 848 | Mesozooplankton | (35) | Parasagitta elegans | -1.25 | 6.15E+08 | 8.63E+10 | 5.04E-04 |
| 849 | Mesozooplankton | (35) | Parasagitta elegans | -1.25 | 9.43E+08 | 1.32E+11 | 1.12E-03 |
| 850 | Mesozooplankton | (35) | Parasagitta elegans | -1.25 | 9.43E+08 | 1.32E+11 | 1.66E-03 |
| 851 | Mesozooplankton | (35) | Parasagitta elegans | -1.25 | 1.25E+09 | 1.76E+11 | 1.80E-03 |
| 852 | Mesozooplankton | (35) | Parasagitta elegans | -1.25 | 1.32E+09 | 1.84E+11 | 1.53E-03 |
| 853 | Mesozooplankton | (35) | Parasagitta elegans | -1.25 | 1.45E+09 | 2.03E+11 | 1.03E-03 |
| 854 | Mesozooplankton | (35) | Parasagitta elegans | -1.25 | 1.45E+09 | 2.03E+11 | 1.21E-03 |
| 855 | Mesozooplankton | (35) | Parasagitta elegans | -1.25 | 1.52E+09 | 2.13E+11 | 1.21E-03 |
| 856 | Mesozooplankton | (35) | Parasagitta elegans | -1.25 | 1.67E+09 | 2.34E+11 | 1.31E-03 |
| 857 | Mesozooplankton | (35) | Parasagitta elegans | -1.25 | 1.59E+09 | 2.23E+11 | 1.12E-03 |
| 858 | Mesozooplankton | (35) | Parasagitta elegans | -1.25 | 1.59E+09 | 2.23E+11 | 1.03E-03 |
| 859 | Mesozooplankton | (35) | Parasagitta elegans | -1.25 | 1.75E+09 | 2.45E+11 | 1.21E-03 |
| 860 | Mesozooplankton | (35) | Parasagitta elegans | -1.25 | 2.02E+09 | 2.83E+11 | 1.03E-03 |
| 861 | Mesozooplankton | (35) | Parasagitta elegans | -1.25 | 2.11E+09 | 2.97E+11 | 1.12E-03 |
| 862 | Mesozooplankton | (35) | Parasagitta elegans | -1.25 | 2.22E+09 | 3.11E+11 | 1.03E-03 |
| 863 | Mesozooplankton | (35) | Parasagitta elegans | -1.25 | 2.11E+09 | 2.97E+11 | 6.93E-04 |
| 864 | Mesozooplankton | (35) | Parasagitta elegans | -1.25 | 2.02E+09 | 2.83E+11 | 1.66E-03 |
| 865 | Mesozooplankton | (35) | Parasagitta elegans | -1.25 | 2.02E+09 | 2.83E+11 | 1.80E-03 |
| 866 | Mesozooplankton | (35) | Parasagitta elegans | -1.25 | 1.75E+09 | 2.45E+11 | 2.11E-03 |
| 867 | Mesozooplankton | (35) | Parasagitta elegans | -1.25 | 2.68E+09 | 3.76E+11 | 1.94E-03 |
| 868 | Mesozooplankton | (35) | Parasagitta elegans | -1.25 | 2.81E+09 | 3.94E+11 | 2.11E-03 |
| 869 | Mesozooplankton | (35) | Parasagitta elegans | -1.25 | 2.81E+09 | 3.94E+11 | 2.28E-03 |
| 870 | Mesozooplankton | (35) | Parasagitta elegans | -1.25 | 2.95E+09 | 4.14E+11 | 2.89E-03 |
| 871 | Mesozooplankton | (35) | Parasagitta elegans | -1.25 | 3.09E+09 | 4.34E+11 | 2.47E-03 |

|     |                 |      |                     |       |          |          |          |
|-----|-----------------|------|---------------------|-------|----------|----------|----------|
| 872 | Mesozooplankton | (35) | Parasagitta elegans | -1.25 | 3.09E+09 | 4.34E+11 | 2.11E-03 |
| 873 | Mesozooplankton | (35) | Parasagitta elegans | -1.25 | 3.24E+09 | 4.55E+11 | 1.80E-03 |
| 874 | Mesozooplankton | (35) | Parasagitta elegans | -1.25 | 3.40E+09 | 4.77E+11 | 1.66E-03 |
| 875 | Mesozooplankton | (35) | Parasagitta elegans | -1.25 | 3.40E+09 | 4.77E+11 | 2.28E-03 |
| 876 | Mesozooplankton | (35) | Parasagitta elegans | -1.25 | 3.56E+09 | 5.00E+11 | 2.28E-03 |
| 877 | Mesozooplankton | (35) | Parasagitta elegans | -1.25 | 3.74E+09 | 5.24E+11 | 2.11E-03 |
| 878 | Mesozooplankton | (35) | Parasagitta elegans | -1.25 | 3.92E+09 | 5.50E+11 | 2.28E-03 |
| 879 | Mesozooplankton | (35) | Parasagitta elegans | -1.25 | 4.11E+09 | 5.77E+11 | 2.11E-03 |
| 880 | Mesozooplankton | (35) | Parasagitta elegans | -1.25 | 4.11E+09 | 5.77E+11 | 1.66E-03 |
| 881 | Mesozooplankton | (35) | Parasagitta elegans | -1.25 | 4.11E+09 | 5.77E+11 | 2.67E-03 |
| 882 | Mesozooplankton | (35) | Parasagitta elegans | -1.25 | 3.74E+09 | 5.24E+11 | 2.89E-03 |
| 883 | Mesozooplankton | (35) | Parasagitta elegans | -1.25 | 4.97E+09 | 6.97E+11 | 3.97E-03 |
| 884 | Mesozooplankton | (35) | Parasagitta elegans | -1.25 | 5.73E+09 | 8.04E+11 | 3.67E-03 |
| 885 | Mesozooplankton | (36) | Oithona similis     | 4.72  | 5.50E+05 | 5.52E+06 | 6.39E-07 |
| 886 | Mesozooplankton | (36) | Oithona similis     | 4.26  | 5.50E+05 | 5.52E+06 | 8.62E-07 |
| 887 | Mesozooplankton | (36) | Oithona similis     | 4.72  | 5.50E+05 | 5.52E+06 | 1.10E-06 |
| 888 | Mesozooplankton | (36) | Oithona similis     | 5.07  | 5.50E+05 | 5.52E+06 | 1.20E-06 |
| 889 | Mesozooplankton | (36) | Oithona similis     | 6.80  | 5.50E+05 | 5.52E+06 | 1.66E-06 |
| 890 | Mesozooplankton | (36) | Oithona similis     | 6.80  | 5.50E+05 | 5.52E+06 | 1.99E-06 |
| 891 | Mesozooplankton | (36) | Oithona similis     | 6.80  | 5.50E+05 | 5.52E+06 | 2.11E-06 |
| 892 | Mesozooplankton | (36) | Oithona similis     | 8.53  | 5.50E+05 | 5.52E+06 | 1.10E-06 |
| 893 | Mesozooplankton | (36) | Oithona similis     | 8.41  | 5.50E+05 | 5.52E+06 | 1.39E-06 |
| 894 | Mesozooplankton | (36) | Oithona similis     | 8.53  | 5.50E+05 | 5.52E+06 | 1.62E-06 |
| 895 | Mesozooplankton | (36) | Oithona similis     | 9.79  | 5.50E+05 | 5.52E+06 | 1.77E-06 |
| 896 | Mesozooplankton | (36) | Oithona similis     | 9.79  | 5.50E+05 | 5.52E+06 | 1.66E-06 |
| 897 | Mesozooplankton | (36) | Oithona similis     | 10.60 | 5.50E+05 | 5.52E+06 | 1.52E-06 |
| 898 | Mesozooplankton | (36) | Oithona similis     | 10.48 | 5.50E+05 | 5.52E+06 | 1.66E-06 |
| 899 | Mesozooplankton | (36) | Oithona similis     | 10.48 | 5.50E+05 | 5.52E+06 | 1.77E-06 |
| 900 | Mesozooplankton | (36) | Oithona similis     | 11.98 | 5.50E+05 | 5.52E+06 | 3.73E-06 |
| 901 | Mesozooplankton | (36) | Oithona similis     | 14.98 | 5.50E+05 | 5.52E+06 | 6.59E-06 |
| 902 | Mesozooplankton | (36) | Oithona similis     | 14.86 | 5.50E+05 | 5.52E+06 | 5.51E-06 |
| 903 | Mesozooplankton | (36) | Oithona similis     | 15.21 | 5.50E+05 | 5.52E+06 | 5.19E-06 |
| 904 | Mesozooplankton | (36) | Oithona similis     | 14.98 | 5.50E+05 | 5.52E+06 | 4.74E-06 |
| 905 | Mesozooplankton | (36) | Oithona similis     | 15.55 | 5.50E+05 | 5.52E+06 | 3.52E-06 |
| 906 | Mesozooplankton | (36) | Oithona similis     | 15.55 | 5.50E+05 | 5.52E+06 | 2.53E-06 |
| 907 | Mesozooplankton | (36) | Oithona similis     | 18.32 | 5.50E+05 | 5.52E+06 | 5.19E-06 |
| 908 | Mesozooplankton | (36) | Oithona similis     | 18.32 | 5.50E+05 | 5.52E+06 | 5.84E-06 |
| 909 | Mesozooplankton | (36) | Oithona similis     | 18.32 | 5.50E+05 | 5.52E+06 | 6.39E-06 |



|     |                 |      |                                |       |          |          |          |
|-----|-----------------|------|--------------------------------|-------|----------|----------|----------|
| 910 | Mesozooplankton | (36) | <i>Oithona similis</i>         | 20.51 | 5.50E+05 | 5.52E+06 | 9.43E-06 |
| 911 | Mesozooplankton | (36) | <i>Oithona similis</i>         | 20.51 | 5.50E+05 | 5.52E+06 | 8.62E-06 |
| 912 | Mesozooplankton | (36) | <i>Oithona similis</i>         | 20.51 | 5.50E+05 | 5.52E+06 | 6.79E-06 |
| 913 | Mesozooplankton | (36) | <i>Oithona similis</i>         | 20.51 | 5.50E+05 | 5.52E+06 | 6.02E-06 |
| 914 | Mesozooplankton | (36) | <i>Oithona similis</i>         | 25.00 | 5.50E+05 | 5.52E+06 | 1.06E-05 |
| 915 | Mesozooplankton | (36) | <i>Oithona similis</i>         | 25.00 | 5.50E+05 | 5.52E+06 | 8.62E-06 |
| 916 | Mesozooplankton | (36) | <i>Oithona similis</i>         | 25.00 | 5.50E+05 | 5.52E+06 | 8.12E-06 |
| 917 | Mesozooplankton | (36) | <i>Oithona similis</i>         | 25.00 | 5.50E+05 | 5.52E+06 | 7.65E-06 |
| 918 | Mesozooplankton | (37) | <i>Pseudodiap tomus hessei</i> | 10.12 | 5.88E+06 | 5.90E+07 | 1.92E-05 |
| 919 | Mesozooplankton | (37) | <i>Pseudodiap tomus hessei</i> | 10.12 | 5.88E+06 | 5.90E+07 | 2.82E-05 |
| 920 | Mesozooplankton | (37) | <i>Pseudodiap tomus hessei</i> | 15.04 | 5.88E+06 | 5.90E+07 | 2.66E-05 |
| 921 | Mesozooplankton | (37) | <i>Pseudodiap tomus hessei</i> | 15.04 | 5.88E+06 | 5.90E+07 | 4.00E-05 |
| 922 | Mesozooplankton | (37) | <i>Pseudodiap tomus hessei</i> | 20.10 | 5.88E+06 | 5.90E+07 | 6.09E-05 |
| 923 | Mesozooplankton | (37) | <i>Pseudodiap tomus hessei</i> | 19.96 | 5.88E+06 | 5.90E+07 | 7.20E-05 |
| 924 | Mesozooplankton | (37) | <i>Pseudodiap tomus hessei</i> | 25.02 | 5.88E+06 | 5.90E+07 | 1.13E-04 |
| 925 | Mesozooplankton | (37) | <i>Pseudodiap tomus hessei</i> | 25.17 | 5.88E+06 | 5.90E+07 | 1.40E-04 |
| 926 | Mesozooplankton | (37) | <i>Pseudodiap tomus hessei</i> | 30.08 | 5.88E+06 | 5.90E+07 | 1.61E-04 |
| 927 | Mesozooplankton | (37) | <i>Pseudodiap tomus hessei</i> | 30.08 | 5.88E+06 | 5.90E+07 | 2.21E-04 |
| 928 | Mesozooplankton | (38) | <i>Aurelia aurata</i>          | 20.00 | 1.12E+10 | 8.38E+12 | 5.55E-02 |
| 929 | Mesozooplankton | (38) | <i>Aurelia aurata</i>          | 20.00 | 4.46E+10 | 3.35E+13 | 5.46E-02 |
| 930 | Mesozooplankton | (38) | <i>Aurelia aurata</i>          | 20.00 | 6.70E+10 | 5.03E+13 | 5.39E-02 |
| 931 | Mesozooplankton | (38) | <i>Aurelia aurata</i>          | 20.00 | 4.46E+10 | 3.35E+13 | 2.22E-01 |
| 932 | Mesozooplankton | (38) | <i>Aurelia aurata</i>          | 20.00 | 7.81E+10 | 5.87E+13 | 2.77E-01 |
| 933 | Mesozooplankton | (38) | <i>Aurelia aurata</i>          | 20.00 | 1.12E+11 | 8.38E+13 | 2.76E-01 |
| 934 | Mesozooplankton | (38) | <i>Aurelia aurata</i>          | 20.00 | 1.23E+11 | 9.22E+13 | 5.55E-01 |
| 935 | Mesozooplankton | (38) | <i>Aurelia aurata</i>          | 20.00 | 1.79E+11 | 1.34E+14 | 3.30E-01 |
| 936 | Mesozooplankton | (38) | <i>Aurelia aurata</i>          | 20.00 | 2.01E+11 | 1.51E+14 | 4.97E-01 |
| 937 | Mesozooplankton | (38) | <i>Aurelia aurata</i>          | 20.00 | 2.68E+11 | 2.01E+14 | 8.85E-01 |
| 938 | Mesozooplankton | (38) | <i>Aurelia aurata</i>          | 20.00 | 2.90E+11 | 2.18E+14 | 1.22E+00 |
| 939 | Mesozooplankton | (38) | <i>Aurelia aurata</i>          | 20.00 | 3.01E+11 | 2.26E+14 | 1.16E+00 |
| 940 | Mesozooplankton | (38) | <i>Aurelia aurata</i>          | 20.00 | 3.46E+11 | 2.60E+14 | 1.16E+00 |
| 941 | Mesozooplankton | (38) | <i>Aurelia aurata</i>          | 20.00 | 3.91E+11 | 2.93E+14 | 1.38E+00 |
| 942 | Mesozooplankton | (38) | <i>Aurelia aurata</i>          | 20.00 | 3.91E+11 | 2.93E+14 | 1.50E+00 |
| 943 | Mesozooplankton | (38) | <i>Aurelia aurata</i>          | 20.00 | 4.13E+11 | 3.10E+14 | 1.44E+00 |
| 944 | Mesozooplankton | (38) | <i>Aurelia aurata</i>          | 20.00 | 6.14E+11 | 4.61E+14 | 2.21E+00 |
| 945 | Mesozooplankton | (38) | <i>Aurelia aurata</i>          | 20.00 | 6.92E+11 | 5.20E+14 | 2.10E+00 |
| 946 | Mesozooplankton | (38) | <i>Aurelia aurata</i>          | 20.00 | 7.37E+11 | 5.53E+14 | 2.77E+00 |
| 947 | Mesozooplankton | (38) | <i>Aurelia aurata</i>          | 20.00 | 7.70E+11 | 5.78E+14 | 2.66E+00 |

|     |                 |      |                       |       |          |          |          |
|-----|-----------------|------|-----------------------|-------|----------|----------|----------|
| 948 | Mesozooplankton | (38) | <i>Aurelia aurata</i> | 20.00 | 7.93E+11 | 5.95E+14 | 2.38E+00 |
| 949 | Mesozooplankton | (38) | <i>Aurelia aurata</i> | 20.00 | 8.04E+11 | 6.03E+14 | 3.21E+00 |
| 950 | Mesozooplankton | (38) | <i>Aurelia aurata</i> | 20.00 | 8.59E+11 | 6.45E+14 | 3.38E+00 |
| 951 | Mesozooplankton | (38) | <i>Aurelia aurata</i> | 20.00 | 1.18E+12 | 8.88E+14 | 4.15E+00 |
| 952 | Mesozooplankton | (38) | <i>Aurelia aurata</i> | 28.00 | 1.00E+11 | 7.54E+13 | 1.14E+00 |
| 953 | Mesozooplankton | (38) | <i>Aurelia aurata</i> | 28.00 | 2.46E+11 | 1.84E+14 | 2.15E+00 |
| 954 | Mesozooplankton | (38) | <i>Aurelia aurata</i> | 28.00 | 2.46E+11 | 1.84E+14 | 2.78E+00 |
| 955 | Mesozooplankton | (38) | <i>Aurelia aurata</i> | 28.00 | 2.79E+11 | 2.09E+14 | 3.80E+00 |
| 956 | Mesozooplankton | (38) | <i>Aurelia aurata</i> | 28.00 | 3.68E+11 | 2.77E+14 | 3.16E+00 |
| 957 | Mesozooplankton | (38) | <i>Aurelia aurata</i> | 28.00 | 4.35E+11 | 3.27E+14 | 3.53E+00 |
| 958 | Mesozooplankton | (38) | <i>Aurelia aurata</i> | 28.00 | 4.13E+11 | 3.10E+14 | 3.66E+00 |
| 959 | Mesozooplankton | (38) | <i>Aurelia aurata</i> | 28.00 | 4.02E+11 | 3.02E+14 | 4.30E+00 |
| 960 | Mesozooplankton | (38) | <i>Aurelia aurata</i> | 28.00 | 3.68E+11 | 2.77E+14 | 5.06E+00 |
| 961 | Mesozooplankton | (38) | <i>Aurelia aurata</i> | 28.00 | 5.02E+11 | 3.77E+14 | 4.67E+00 |
| 962 | Mesozooplankton | (38) | <i>Aurelia aurata</i> | 28.00 | 5.58E+11 | 4.19E+14 | 4.54E+00 |
| 963 | Mesozooplankton | (38) | <i>Aurelia aurata</i> | 28.00 | 5.36E+11 | 4.02E+14 | 5.05E+00 |
| 964 | Mesozooplankton | (38) | <i>Aurelia aurata</i> | 28.00 | 5.02E+11 | 3.77E+14 | 5.69E+00 |
| 965 | Mesozooplankton | (38) | <i>Aurelia aurata</i> | 28.00 | 6.47E+11 | 4.86E+14 | 5.94E+00 |
| 966 | Mesozooplankton | (38) | <i>Aurelia aurata</i> | 28.00 | 7.26E+11 | 5.45E+14 | 7.46E+00 |
| 967 | Mesozooplankton | (38) | <i>Aurelia aurata</i> | 28.00 | 9.15E+11 | 6.87E+14 | 5.79E+00 |
| 968 | Mesozooplankton | (38) | <i>Aurelia aurata</i> | 28.00 | 9.38E+11 | 7.04E+14 | 6.17E+00 |
| 969 | Mesozooplankton | (38) | <i>Aurelia aurata</i> | 28.00 | 8.93E+11 | 6.70E+14 | 6.30E+00 |
| 970 | Mesozooplankton | (38) | <i>Aurelia aurata</i> | 28.00 | 9.04E+11 | 6.79E+14 | 6.81E+00 |
| 971 | Mesozooplankton | (38) | <i>Aurelia aurata</i> | 28.00 | 9.26E+11 | 6.96E+14 | 7.06E+00 |
| 972 | Mesozooplankton | (38) | <i>Aurelia aurata</i> | 28.00 | 1.06E+12 | 7.96E+14 | 6.29E+00 |
| 973 | Mesozooplankton | (38) | <i>Aurelia aurata</i> | 28.00 | 1.06E+12 | 7.96E+14 | 6.55E+00 |
| 974 | Mesozooplankton | (38) | <i>Aurelia aurata</i> | 28.00 | 1.08E+12 | 8.13E+14 | 6.54E+00 |
| 975 | Mesozooplankton | (38) | <i>Aurelia aurata</i> | 28.00 | 1.32E+12 | 9.89E+14 | 7.55E+00 |
| 976 | Mesozooplankton | (38) | <i>Aurelia aurata</i> | 28.00 | 1.37E+12 | 1.03E+15 | 8.18E+00 |
| 977 | Mesozooplankton | (38) | <i>Aurelia aurata</i> | 28.00 | 1.64E+12 | 1.23E+15 | 8.54E+00 |
| 978 | Mesozooplankton | (38) | <i>Aurelia aurata</i> | 28.00 | 1.76E+12 | 1.32E+15 | 9.04E+00 |
| 979 | Mesozooplankton | (38) | <i>Aurelia aurata</i> | 28.00 | 1.79E+12 | 1.34E+15 | 1.04E+01 |
| 980 | Mesozooplankton | (39) | <i>Beroe ovata</i>    | 21.00 | 1.66E+09 | 5.00E+11 | 3.79E-03 |
| 981 | Mesozooplankton | (39) | <i>Beroe ovata</i>    | 21.00 | 3.14E+09 | 9.44E+11 | 5.41E-03 |
| 982 | Mesozooplankton | (39) | <i>Beroe ovata</i>    | 21.00 | 3.27E+09 | 9.82E+11 | 6.08E-03 |
| 983 | Mesozooplankton | (39) | <i>Beroe ovata</i>    | 21.00 | 5.06E+09 | 1.52E+12 | 8.02E-03 |
| 984 | Mesozooplankton | (39) | <i>Beroe ovata</i>    | 21.00 | 6.68E+09 | 2.01E+12 | 9.77E-03 |
| 985 | Mesozooplankton | (39) | <i>Beroe ovata</i>    | 21.00 | 6.68E+09 | 2.01E+12 | 2.15E-02 |

|      |                 |      |                        |       |          |          |          |
|------|-----------------|------|------------------------|-------|----------|----------|----------|
| 986  | Mesozooplankton | (39) | <i>Beroe ovata</i>     | 21.00 | 9.94E+09 | 2.98E+12 | 2.62E-02 |
| 987  | Mesozooplankton | (39) | <i>Beroe ovata</i>     | 21.00 | 1.80E+10 | 5.41E+12 | 2.52E-02 |
| 988  | Mesozooplankton | (39) | <i>Beroe ovata</i>     | 21.00 | 2.58E+10 | 7.74E+12 | 5.77E-02 |
| 989  | Mesozooplankton | (39) | <i>Beroe ovata</i>     | 21.00 | 2.79E+10 | 8.38E+12 | 5.33E-02 |
| 990  | Mesozooplankton | (39) | <i>Beroe ovata</i>     | 21.00 | 2.58E+10 | 7.74E+12 | 6.25E-02 |
| 991  | Mesozooplankton | (39) | <i>Beroe ovata</i>     | 21.00 | 2.68E+10 | 8.05E+12 | 6.50E-02 |
| 992  | Mesozooplankton | (39) | <i>Beroe ovata</i>     | 21.00 | 5.70E+10 | 1.71E+13 | 1.17E-01 |
| 993  | Mesozooplankton | (39) | <i>Beroe ovata</i>     | 21.00 | 7.23E+10 | 2.17E+13 | 1.81E-01 |
| 994  | Mesozooplankton | (39) | <i>Beroe ovata</i>     | 21.00 | 1.16E+11 | 3.50E+13 | 3.03E-01 |
| 995  | Mesozooplankton | (39) | <i>Beroe ovata</i>     | 21.00 | 1.66E+11 | 5.00E+13 | 3.15E-01 |
| 996  | Mesozooplankton | (39) | <i>Beroe ovata</i>     | 21.00 | 1.95E+11 | 5.86E+13 | 6.41E-01 |
| 997  | Mesozooplankton | (40) | <i>Calanus sinicus</i> | 12.00 | 7.57E+07 | 7.60E+08 | 3.11E-04 |
| 998  | Mesozooplankton | (40) | <i>Calanus sinicus</i> | 9.00  | 6.13E+07 | 6.15E+08 | 2.25E-04 |
| 999  | Mesozooplankton | (40) | <i>Calanus sinicus</i> | 18.00 | 6.92E+07 | 6.94E+08 | 3.43E-04 |
| 1000 | Mesozooplankton | (40) | <i>Calanus sinicus</i> | 27.00 | 7.84E+07 | 7.86E+08 | 9.00E-04 |
| 1001 | Mesozooplankton | (40) | <i>Calanus sinicus</i> | 12.00 | 6.63E+07 | 6.64E+08 | 2.79E-04 |
| 1002 | Mesozooplankton | (40) | <i>Calanus sinicus</i> | 18.00 | 7.19E+07 | 7.22E+08 | 6.86E-04 |
| 1003 | Mesozooplankton | (41) | <i>Aurelia aurita</i>  | 15.00 | 1.25E+07 | 9.42E+09 | 5.04E-04 |
| 1004 | Mesozooplankton | (41) | <i>Aurelia aurita</i>  | 15.00 | 1.68E+07 | 1.26E+10 | 4.67E-04 |
| 1005 | Mesozooplankton | (41) | <i>Aurelia aurita</i>  | 15.00 | 1.68E+07 | 1.26E+10 | 5.44E-04 |
| 1006 | Mesozooplankton | (41) | <i>Aurelia aurita</i>  | 15.00 | 2.00E+07 | 1.50E+10 | 7.94E-04 |
| 1007 | Mesozooplankton | (41) | <i>Aurelia aurita</i>  | 15.00 | 4.25E+07 | 3.19E+10 | 6.82E-04 |
| 1008 | Mesozooplankton | (41) | <i>Aurelia aurita</i>  | 15.00 | 5.69E+07 | 4.27E+10 | 6.33E-04 |
| 1009 | Mesozooplankton | (41) | <i>Aurelia aurita</i>  | 15.00 | 5.69E+07 | 4.27E+10 | 8.56E-04 |
| 1010 | Mesozooplankton | (41) | <i>Aurelia aurita</i>  | 15.00 | 5.69E+07 | 4.27E+10 | 1.07E-03 |
| 1011 | Mesozooplankton | (41) | <i>Aurelia aurita</i>  | 15.00 | 9.06E+07 | 6.80E+10 | 8.56E-04 |
| 1012 | Mesozooplankton | (41) | <i>Aurelia aurita</i>  | 15.00 | 1.44E+08 | 1.08E+11 | 9.24E-04 |
| 1013 | Mesozooplankton | (41) | <i>Aurelia aurita</i>  | 15.00 | 1.44E+08 | 1.08E+11 | 9.96E-04 |
| 1014 | Mesozooplankton | (41) | <i>Aurelia aurita</i>  | 15.00 | 1.36E+08 | 1.02E+11 | 1.16E-03 |
| 1015 | Mesozooplankton | (41) | <i>Aurelia aurita</i>  | 15.00 | 1.93E+08 | 1.45E+11 | 1.25E-03 |
| 1016 | Mesozooplankton | (41) | <i>Aurelia aurita</i>  | 15.00 | 2.30E+08 | 1.72E+11 | 1.46E-03 |
| 1017 | Mesozooplankton | (41) | <i>Aurelia aurita</i>  | 15.00 | 1.93E+08 | 1.45E+11 | 1.97E-03 |
| 1018 | Mesozooplankton | (41) | <i>Aurelia aurita</i>  | 15.00 | 2.58E+08 | 1.94E+11 | 1.69E-03 |
| 1019 | Mesozooplankton | (41) | <i>Aurelia aurita</i>  | 15.00 | 3.88E+08 | 2.91E+11 | 1.46E-03 |
| 1020 | Mesozooplankton | (41) | <i>Aurelia aurita</i>  | 15.00 | 5.18E+08 | 3.89E+11 | 1.69E-03 |
| 1021 | Mesozooplankton | (41) | <i>Aurelia aurita</i>  | 15.00 | 5.82E+08 | 4.37E+11 | 1.69E-03 |
| 1022 | Mesozooplankton | (41) | <i>Aurelia aurita</i>  | 15.00 | 4.89E+08 | 3.67E+11 | 3.10E-03 |
| 1023 | Mesozooplankton | (41) | <i>Aurelia aurita</i>  | 15.00 | 5.18E+08 | 3.89E+11 | 3.10E-03 |

|      |                 |      |                            |       |          |          |          |
|------|-----------------|------|----------------------------|-------|----------|----------|----------|
| 1024 | Mesozooplankton | (41) | <i>Aurelia aurita</i>      | 15.00 | 5.49E+08 | 4.12E+11 | 3.90E-03 |
| 1025 | Mesozooplankton | (41) | <i>Aurelia aurita</i>      | 15.00 | 6.54E+08 | 4.91E+11 | 3.35E-03 |
| 1026 | Mesozooplankton | (41) | <i>Aurelia aurita</i>      | 15.00 | 1.04E+09 | 7.82E+11 | 5.27E-03 |
| 1027 | Mesozooplankton | (41) | <i>Aurelia aurita</i>      | 15.00 | 1.17E+09 | 8.78E+11 | 8.96E-03 |
| 1028 | Mesozooplankton | (41) | <i>Aurelia aurita</i>      | 15.00 | 1.17E+09 | 8.78E+11 | 1.21E-02 |
| 1029 | Mesozooplankton | (41) | <i>Aurelia aurita</i>      | 15.00 | 1.10E+09 | 8.29E+11 | 1.64E-02 |
| 1030 | Mesozooplankton | (41) | <i>Aurelia aurita</i>      | 15.00 | 1.31E+09 | 9.87E+11 | 1.64E-02 |
| 1031 | Mesozooplankton | (41) | <i>Aurelia aurita</i>      | 15.00 | 1.97E+09 | 1.48E+12 | 2.06E-02 |
| 1032 | Mesozooplankton | (41) | <i>Aurelia aurita</i>      | 15.00 | 2.09E+09 | 1.57E+12 | 1.41E-02 |
| 1033 | Mesozooplankton | (41) | <i>Aurelia aurita</i>      | 15.00 | 2.64E+09 | 1.98E+12 | 1.64E-02 |
| 1034 | Mesozooplankton | (41) | <i>Aurelia aurita</i>      | 15.00 | 5.31E+09 | 3.98E+12 | 1.52E-02 |
| 1035 | Mesozooplankton | (41) | <i>Aurelia aurita</i>      | 15.00 | 6.32E+09 | 4.74E+12 | 2.22E-02 |
| 1036 | Mesozooplankton | (41) | <i>Aurelia aurita</i>      | 15.00 | 8.95E+09 | 6.72E+12 | 1.48E-01 |
| 1037 | Mesozooplankton | (41) | <i>Aurelia aurita</i>      | 15.00 | 1.01E+10 | 7.55E+12 | 1.48E-01 |
| 1038 | Mesozooplankton | (41) | <i>Aurelia aurita</i>      | 15.00 | 1.13E+10 | 8.48E+12 | 1.59E-01 |
| 1039 | Mesozooplankton | (41) | <i>Aurelia aurita</i>      | 15.00 | 2.86E+10 | 2.15E+13 | 1.85E-01 |
| 1040 | Mesozooplankton | (41) | <i>Aurelia aurita</i>      | 15.00 | 6.47E+10 | 4.85E+13 | 4.96E-01 |
| 1041 | Mesozooplankton | (41) | <i>Aurelia aurita</i>      | 15.00 | 3.18E+07 | 2.39E+10 | 2.97E-04 |
| 1042 | Mesozooplankton | (41) | <i>Aurelia aurita</i>      | 15.00 | 3.57E+07 | 2.68E+10 | 2.97E-04 |
| 1043 | Mesozooplankton | (41) | <i>Aurelia aurita</i>      | 15.00 | 3.18E+07 | 2.39E+10 | 4.67E-04 |
| 1044 | Mesozooplankton | (41) | <i>Aurelia aurita</i>      | 15.00 | 4.01E+07 | 3.01E+10 | 5.04E-04 |
| 1045 | Mesozooplankton | (41) | <i>Aurelia aurita</i>      | 15.00 | 4.51E+07 | 3.38E+10 | 5.04E-04 |
| 1046 | Mesozooplankton | (42) | <i>Mnemiopsis mccradyi</i> | 21.00 | 2.74E+08 | 8.51E+11 | 3.41E-03 |
| 1047 | Mesozooplankton | (42) | <i>Mnemiopsis mccradyi</i> | 21.00 | 6.10E+08 | 1.90E+12 | 3.71E-03 |
| 1048 | Mesozooplankton | (42) | <i>Mnemiopsis mccradyi</i> | 21.00 | 1.06E+09 | 3.30E+12 | 5.44E-03 |
| 1049 | Mesozooplankton | (42) | <i>Mnemiopsis mccradyi</i> | 21.00 | 1.11E+09 | 3.45E+12 | 6.53E-03 |
| 1050 | Mesozooplankton | (42) | <i>Mnemiopsis mccradyi</i> | 21.00 | 1.61E+09 | 5.00E+12 | 1.12E-02 |
| 1051 | Mesozooplankton | (42) | <i>Mnemiopsis mccradyi</i> | 21.00 | 1.89E+09 | 5.89E+12 | 9.66E-03 |
| 1052 | Mesozooplankton | (42) | <i>Mnemiopsis mccradyi</i> | 21.00 | 1.98E+09 | 6.14E+12 | 1.18E-02 |
| 1053 | Mesozooplankton | (42) | <i>Mnemiopsis mccradyi</i> | 21.00 | 2.07E+09 | 6.44E+12 | 1.18E-02 |
| 1054 | Mesozooplankton | (42) | <i>Mnemiopsis mccradyi</i> | 21.00 | 3.08E+09 | 9.59E+12 | 1.45E-02 |
| 1055 | Mesozooplankton | (42) | <i>Mnemiopsis mccradyi</i> | 21.00 | 5.09E+09 | 1.58E+13 | 2.15E-02 |
| 1056 | Mesozooplankton | (42) | <i>Mnemiopsis mccradyi</i> | 21.00 | 6.58E+09 | 2.05E+13 | 3.43E-02 |
| 1057 | Mesozooplankton | (42) | <i>Mnemiopsis mccradyi</i> | 21.00 | 2.74E+08 | 8.51E+11 | 3.41E-03 |
| 1058 | Mesozooplankton | (42) | <i>Mnemiopsis mccradyi</i> | 21.00 | 3.38E+08 | 1.05E+12 | 3.03E-03 |
| 1059 | Mesozooplankton | (42) | <i>Mnemiopsis mccradyi</i> | 21.00 | 6.91E+08 | 2.15E+12 | 5.88E-03 |
| 1060 | Mesozooplankton | (42) | <i>Mnemiopsis mccradyi</i> | 21.00 | 6.76E+08 | 2.10E+12 | 7.71E-03 |
| 1061 | Mesozooplankton | (42) | <i>Mnemiopsis mccradyi</i> | 21.00 | 7.88E+08 | 2.45E+12 | 9.15E-03 |

|      |                 |      |                     |       |          |          |          |
|------|-----------------|------|---------------------|-------|----------|----------|----------|
| 1062 | Mesozooplankton | (42) | Mnemiopsis mccradyi | 21.00 | 1.08E+09 | 3.35E+12 | 1.35E-02 |
| 1063 | Mesozooplankton | (42) | Mnemiopsis mccradyi | 21.00 | 2.17E+09 | 6.75E+12 | 2.46E-02 |
| 1064 | Mesozooplankton | (42) | Mnemiopsis mccradyi | 21.00 | 1.29E+09 | 4.01E+12 | 2.29E-02 |
| 1065 | Mesozooplankton | (42) | Mnemiopsis mccradyi | 21.00 | 2.59E+09 | 8.05E+12 | 2.63E-02 |
| 1066 | Mesozooplankton | (42) | Mnemiopsis mccradyi | 21.00 | 3.22E+09 | 1.00E+13 | 3.10E-02 |
| 1067 | Mesozooplankton | (42) | Mnemiopsis mccradyi | 21.00 | 2.90E+08 | 9.01E+11 | 3.04E-03 |
| 1068 | Mesozooplankton | (42) | Mnemiopsis mccradyi | 21.00 | 9.01E+08 | 2.80E+12 | 1.28E-02 |
| 1069 | Mesozooplankton | (42) | Mnemiopsis mccradyi | 21.00 | 1.29E+09 | 4.00E+12 | 1.64E-02 |
| 1070 | Mesozooplankton | (42) | Mnemiopsis mccradyi | 21.00 | 2.32E+09 | 7.21E+12 | 3.22E-02 |
| 1071 | Mesozooplankton | (42) | Mnemiopsis mccradyi | 21.00 | 2.51E+09 | 7.80E+12 | 2.85E-02 |
| 1072 | Mesozooplankton | (42) | Mnemiopsis mccradyi | 21.00 | 3.36E+09 | 1.05E+13 | 3.68E-02 |
| 1073 | Mesozooplankton | (42) | Mnemiopsis mccradyi | 21.00 | 3.62E+09 | 1.12E+13 | 2.87E-02 |
| 1074 | Mesozooplankton | (42) | Mnemiopsis mccradyi | 21.00 | 4.88E+09 | 1.52E+13 | 6.50E-02 |
| 1075 | Mesozooplankton | (42) | Mnemiopsis mccradyi | 21.00 | 5.15E+09 | 1.60E+13 | 7.37E-02 |
| 1076 | Mesozooplankton | (42) | Mnemiopsis mccradyi | 21.00 | 1.94E+08 | 6.03E+11 | 5.25E-03 |
| 1077 | Mesozooplankton | (42) | Mnemiopsis mccradyi | 21.00 | 2.43E+08 | 7.54E+11 | 7.07E-03 |
| 1078 | Mesozooplankton | (42) | Mnemiopsis mccradyi | 21.00 | 4.36E+08 | 1.36E+12 | 9.95E-03 |
| 1079 | Mesozooplankton | (42) | Mnemiopsis mccradyi | 21.00 | 5.80E+08 | 1.80E+12 | 1.07E-02 |
| 1080 | Mesozooplankton | (42) | Mnemiopsis mccradyi | 21.00 | 5.16E+08 | 1.61E+12 | 1.21E-02 |
| 1081 | Mesozooplankton | (42) | Mnemiopsis mccradyi | 21.00 | 8.71E+08 | 2.71E+12 | 1.86E-02 |
| 1082 | Mesozooplankton | (42) | Mnemiopsis mccradyi | 21.00 | 1.19E+09 | 3.72E+12 | 3.06E-02 |
| 1083 | Mesozooplankton | (42) | Mnemiopsis mccradyi | 21.00 | 1.87E+09 | 5.81E+12 | 3.60E-02 |
| 1084 | Mesozooplankton | (42) | Mnemiopsis mccradyi | 21.00 | 2.66E+09 | 8.28E+12 | 5.78E-02 |
| 1085 | Mesozooplankton | (43) | Cyclosalpa bakerei  | 11.00 | 3.74E+08 | 5.26E+11 | 1.54E-03 |
| 1086 | Mesozooplankton | (43) | Cyclosalpa bakerei  | 11.00 | 5.28E+08 | 7.81E+11 | 1.07E-03 |
| 1087 | Mesozooplankton | (43) | Cyclosalpa bakerei  | 11.00 | 7.79E+08 | 1.22E+12 | 3.34E-03 |
| 1088 | Mesozooplankton | (43) | Cyclosalpa bakerei  | 11.00 | 9.73E+08 | 1.58E+12 | 2.19E-03 |
| 1089 | Mesozooplankton | (43) | Cyclosalpa bakerei  | 11.00 | 9.09E+08 | 1.46E+12 | 6.20E-03 |
| 1090 | Mesozooplankton | (43) | Cyclosalpa bakerei  | 11.00 | 1.12E+09 | 1.86E+12 | 4.20E-03 |
| 1091 | Mesozooplankton | (43) | Cyclosalpa bakerei  | 11.00 | 1.26E+09 | 2.13E+12 | 4.05E-03 |
| 1092 | Mesozooplankton | (43) | Cyclosalpa bakerei  | 11.00 | 1.11E+09 | 1.84E+12 | 6.74E-03 |
| 1093 | Mesozooplankton | (43) | Cyclosalpa bakerei  | 11.00 | 1.20E+09 | 2.00E+12 | 1.07E-02 |
| 1094 | Mesozooplankton | (43) | Cyclosalpa bakerei  | 11.00 | 1.50E+09 | 2.60E+12 | 1.17E-02 |
| 1095 | Mesozooplankton | (43) | Cyclosalpa bakerei  | 11.00 | 1.51E+09 | 2.62E+12 | 7.27E-03 |
| 1096 | Mesozooplankton | (43) | Cyclosalpa bakerei  | 11.00 | 1.94E+09 | 3.49E+12 | 1.34E-02 |
| 1097 | Mesozooplankton | (43) | Cyclosalpa bakerei  | 11.00 | 2.05E+09 | 3.72E+12 | 1.52E-02 |
| 1098 | Mesozooplankton | (43) | Cyclosalpa bakerei  | 11.00 | 1.92E+09 | 3.45E+12 | 1.84E-02 |
| 1099 | Mesozooplankton | (43) | Cyclosalpa bakerei  | 11.00 | 1.85E+09 | 3.30E+12 | 1.96E-02 |

|      |                 |      |                    |       |          |          |          |
|------|-----------------|------|--------------------|-------|----------|----------|----------|
| 1100 | Mesozooplankton | (43) | Cyclosalpa bakerei | 11.00 | 1.95E+09 | 3.52E+12 | 2.29E-02 |
| 1101 | Mesozooplankton | (43) | Cyclosalpa bakerei | 11.00 | 2.53E+09 | 4.74E+12 | 1.13E-02 |
| 1102 | Mesozooplankton | (43) | Cyclosalpa bakerei | 11.00 | 3.56E+09 | 7.01E+12 | 1.78E-02 |
| 1103 | Mesozooplankton | (43) | Cyclosalpa bakerei | 11.00 | 3.00E+09 | 5.75E+12 | 2.23E-02 |
| 1104 | Mesozooplankton | (43) | Cyclosalpa bakerei | 11.00 | 3.59E+09 | 7.07E+12 | 3.33E-02 |
| 1105 | Mesozooplankton | (43) | Cyclosalpa bakerei | 11.00 | 4.05E+09 | 8.12E+12 | 3.30E-02 |
| 1106 | Mesozooplankton | (43) | Cyclosalpa bakerei | 11.00 | 4.16E+09 | 8.37E+12 | 3.40E-02 |
| 1107 | Mesozooplankton | (43) | Cyclosalpa bakerei | 11.00 | 4.11E+09 | 8.26E+12 | 3.99E-02 |
| 1108 | Mesozooplankton | (43) | Cyclosalpa bakerei | 11.00 | 6.99E+09 | 1.52E+13 | 8.48E-02 |
| 1109 | Mesozooplankton | (43) | Cyclosalpa bakerei | 11.00 | 7.86E+09 | 1.74E+13 | 6.55E-02 |
| 1110 | Mesozooplankton | (43) | Cyclosalpa bakerei | 11.00 | 1.05E+10 | 2.43E+13 | 1.17E-01 |
| 1111 | Mesozooplankton | (43) | Cyclosalpa bakerei | 11.00 | 1.05E+10 | 2.43E+13 | 1.21E-01 |

Data were extracted from tables or digitized from figures reported in the original papers (Ref). Columns show the temperature in degrees celsius (Temp), body size in picograms of carbon (Carbon), body volume in  $\mu\text{m}^3$  (Vol), respiration in  $\text{mmol of O}_2 \cdot \text{d}^{-1}$  (Resp) and PAR in  $\text{mol of photons} \cdot \text{m}^{-2} \cdot \text{d}^{-1}$ . When phytoplankton or microzooplankton body mass was expressed as cell volume, it was converted to carbon units using the appropriate relationship (44). In Fig. 5B, we used as a measure of body size the biovolume reported in the original studies [in order to avoid possible artifacts of carbon to volume conversion equations (45 and 46)]. When zooplankton mass was reported as dry or wet weight, it was converted into carbon by using the factors in refs. 28 and 47. In a few occasions where neither body volume or mass were reported, we used the body carbon for the same species reported in one of the other sources compiled.

## References

1. Eppley, R. W. & Sloan, P. R. (1965) *J. Fish. Res. Board Can.* **22**, 1083-&.
2. Falkowski, P. G., Dubinsky, Z. & Wyman, K. (1985) *Limnol. Oceanogr.* **30**, 311-321.
3. Garcia, V. M. T. & Purdie, D. A. (1992) *J. Plankton Res.* **14**, 1251-1265.

4. Geider, R. J., Osborne, B. A. & Raven, J. A. (1985) *J. Phycol.* **21**, 609–619.
5. Herzig, R. & Falkowski, P. G. (1989) *J. Phycol.* **25**, 462–471.
6. Langdon, C. (1987) *J. Plankton Res.* **9**, 459–482.
7. Laws, E. A. & Wong, D. C. L. (1978) *J. Phycol.* **14**, 406–416.
8. Levy, I. & Gantt, E. (1990) *J. Phycol.* **26**, 62–68.
9. Martinez, R. (1992) *J. Plankton Res.* **14**, 789–797.
10. Daneri, G., Iriarte, A., Garcia, V. M., Purdie, D. A. & Crawford, D. W. (1992) *J. Mar. Biol. Assoc. U.K.* **72**, 723–726.
11. Kusk, K. O. (1981) *Bot. Mar.* **24**, 413–418.
12. Rees, T. A. V. (2001) *J. Phycol.* **37**, 59–63.
13. Gilstad, M., Johnsen, G. & Sakshaug, E. (1993) *J. Plankton Res.* **15**, 939–951.
14. Henley, W. J. & Yin, Y. (1998) *J. Phycol.* **34**, 94–103.
15. Hobson, L. A., Hartley, F. A. & Ketcham, D. E. (1979) *Plant Phys.* **63**, 947–951.
16. Iriarte, A. & Purdie, D. A. (1993) *J. Exp. Mar. Biol. Ecol.* **168**, 239–257.
17. Verity, P. G. (1982) *J. Exp. Mar. Biol. Ecol.* **60**, 197–207.
18. Finkel, Z. V. (2001) *Limnol. Oceanogr.* **46**, 86–94.
19. Gonzalez, N., Anadon, R. & Viesca, L. (2003) *Aquat. Microb. Ecol.* **33**, 117–126.
20. Biddanda, B., Opsahl, S. & Benner, R. (1994) *Limnol. Oceanogr.* **39**, 1259–1275.

21. Pomeroy, L. R., Sheldon, J. E., Sheldon, W. M. & Peters, F. (1995) *Mar. Ecol. Prog. Ser.* **117**, 259–268.
22. Carlson, C. A., Bates, N. R., Ducklow, H. W. & Hansell, D. A. (1999) *Aquat. Microb. Ecol.* **19**, 229–244.
23. Kahler, P., Bjornsen, P. K., Lochte, K. & Antia, A. (1997) *Deep-Sea Res. II* **44**, 341–353.
24. Navarro, N., Agusti, S. & Duarte, C. M. (2004) *Aquat. Microb. Ecol.* **37**, 47–54.
25. Crawford, D. W. & Stoecker, D. K. (1996) *Mar. Biol.* **126**, 415–422.
26. Verity, P. G. (1985) *Limnol. Oceanogr.* **30**, 1268–1282.
27. Fenchel, T. & Finlay, B. J. (1983) *Microb. Ecol.* **9**, 99–122.
28. Ikeda, T. (1974) *Mem. Fac. Fish. Hokkaido Univ.* **22**, 1–97.
29. Ikeda, T., Kanno, Y., Ozaki, K. & Shinada, A. (2001) *Mar. Biol.* **139**, 587–596. food limitation.
30. Gorsky, G., Palazzoli, I. & Fenaux, R. (1987) *Mar. Biol.* **94**, 191–201. GPC.
31. Gorsky, G., Palazzoli, I. & Fenaux, R. (1984) *C. R. Acad. Sci. Paris; Série III, n° 18 Sci. Vie* **298**, 531–534.
32. Ikeda, T. & Skjoldal, H. R. (1989) *Mar. Biol.* **100**, 173–183.
33. Ikeda, T. & Bruce, B. (1986) *Mar. Biol.* **92**, 545–555.
34. Ikeda, T. & Mitchell, A. (1982) *Mar. Biol.* **71**, 283–298.
35. Welch, H. E., Siferd, T. D. & Bruecker, P. (1996) *Can. J. Fish. Aquat. Sci.* **53**, 520–527.



36. Castellani, C., Robinson, C., Smith, T. & Lampitt, R. S. (2005) *Mar. Ecol. Prog. Ser.* **285**, 129–135.
37. Isla, J. A. & Perissinotto, R. (2004) *J. Plankton Res.* **26**, 579–583.
38. Uye, S. & Shimauchi, H. (2005) *J. Plankton Res.* **27**, 237–248.
39. Finenko, G. A., Anninsky, B. E., Romanova, Z. A., Abolmasova, G. I. & Kideys, A. E. (2001) *Hydrobiologia* **451**, 177–186.
40. Li, C., Sun, S., Wang, R. & Wang, X. (2004) *Mar. Biol.* **145**, 149–157.
41. Frandsen, K. T. & Riisgard, H. U. (1997) *Sarsia* **82**, 307–312.
42. Kremer, P. (1982) *Mar. Biol.* **71**, 149–156.
43. Madin, L. P. & Purcell, J. E. (1992) *Limnol. Oceanogr.* **37**, 1236–1251.
44. Menden-Deuer, S. & Lessard, E. J. (2000) *Limnol. Oceanogr.* **45**, 569–579.
45. Tang, E. P. Y. & Peters, R. H. (1995) *J. Plankton Res.* **17**, 303–315.
46. Tang, E. (1995) *J. Plankton Res.* **17**, 1325–1335.
47. Schneider, G. (1992) *Helgol. Wiss. Meeresunters* **46**, 377–388.
