# Supplementary material
Source: PubMed Central journal article supplement (PMC1482648)
Supplement: pnas_0601137103_8.pdf [file pnas_0601137103_8.pdf]

**Table 3. Production rates of marine phytoplankton**

|    | Ref | Species                          | Temp  | Carbon   | Vol      | Prod     | PAR   |
|----|-----|----------------------------------|-------|----------|----------|----------|-------|
| 1  | (1) | <i>Storeatula major</i>          | 20.00 | 4.32E+01 | 2.82E+02 | 1.17E−09 | 1.30  |
| 2  | (1) | <i>Storeatula major</i>          | 20.00 | 3.51E+01 | 2.26E+02 | 2.29E−09 | 2.59  |
| 3  | (1) | <i>Storeatula major</i>          | 20.00 | 3.51E+01 | 2.26E+02 | 2.87E−09 | 2.59  |
| 4  | (1) | <i>Karlodinium micrum</i>        | 20.00 | 6.27E+01 | 4.19E+02 | 2.66E−09 | 17.28 |
| 5  | (1) | <i>Storeatula major</i>          | 20.00 | 4.32E+01 | 2.82E+02 | 1.24E−09 | 1.30  |
| 6  | (1) | <i>Storeatula major</i>          | 20.00 | 3.14E+01 | 2.00E+02 | 5.43E−09 | 4.32  |
| 7  | (1) | <i>Storeatula major</i>          | 20.00 | 3.06E+01 | 1.96E+02 | 5.76E−09 | 10.80 |
| 8  | (1) | <i>Storeatula major</i>          | 20.00 | 3.58E+01 | 2.31E+02 | 5.93E−09 | 17.28 |
| 9  | (1) | <i>Storeatula major</i>          | 20.00 | 3.00E+01 | 1.91E+02 | 3.45E−09 | 6.05  |
| 10 | (1) | <i>Storeatula major</i>          | 20.00 | 3.00E+01 | 1.91E+02 | 3.83E−09 | 6.05  |
| 11 | (1) | <i>Karlodinium micrum</i>        | 20.00 | 1.26E+02 | 8.79E+02 | 1.47E−09 | 1.30  |
| 12 | (1) | <i>Karlodinium micrum</i>        | 20.00 | 1.26E+02 | 8.79E+02 | 1.47E−09 | 1.30  |
| 13 | (1) | <i>Karlodinium micrum</i>        | 20.00 | 8.81E+01 | 6.02E+02 | 2.53E−09 | 2.59  |
| 14 | (1) | <i>Storeatula major</i>          | 20.00 | 3.58E+01 | 2.31E+02 | 8.28E−09 | 17.28 |
| 15 | (1) | <i>Karlodinium micrum</i>        | 20.00 | 8.81E+01 | 6.02E+02 | 1.96E−09 | 2.59  |
| 16 | (1) | <i>Karlodinium micrum</i>        | 20.00 | 5.80E+01 | 3.86E+02 | 2.71E−09 | 10.80 |
| 17 | (1) | <i>Storeatula major</i>          | 20.00 | 3.06E+01 | 1.96E+02 | 5.59E−09 | 10.80 |
| 18 | (1) | <i>Karlodinium micrum</i>        | 20.00 | 7.08E+01 | 4.77E+02 | 3.16E−09 | 4.32  |
| 19 | (1) | <i>Karlodinium micrum</i>        | 20.00 | 5.80E+01 | 3.86E+02 | 2.93E−09 | 10.80 |
| 20 | (1) | <i>Karlodinium micrum</i>        | 20.00 | 7.08E+01 | 4.77E+02 | 3.03E−09 | 4.32  |
| 21 | (1) | <i>Storeatula major</i>          | 20.00 | 3.14E+01 | 2.00E+02 | 4.90E−09 | 4.32  |
| 22 | (1) | <i>Karlodinium micrum</i>        | 20.00 | 6.34E+01 | 4.24E+02 | 2.60E−09 | 6.05  |
| 23 | (1) | <i>Karlodinium micrum</i>        | 20.00 | 6.34E+01 | 4.24E+02 | 2.43E−09 | 6.05  |
| 24 | (2) | <i>Thalassiosira pseudonana</i>  | 18.00 | 1.10E+01 | 7.70E+01 | 3.19E−09 | 27.65 |
| 25 | (2) | <i>Thalassiosira weissflogii</i> | 18.00 | 1.75E+02 | 5.29E+02 | 2.51E−08 | 27.65 |
| 26 | (2) | <i>Coscinodiscus</i> sp.         | 18.00 | 1.59E+05 | 6.20E+06 | 7.72E−06 | 27.65 |
| 27 | (2) | <i>Coscinodiscus</i> sp.         | 18.00 | 1.21E+04 | 2.75E+05 | 6.82E−07 | 27.65 |
| 28 | (2) | <i>Skeletonema costatum</i>      | 18.00 | 1.20E+01 | 1.27E+02 | 3.33E−09 | 27.65 |

|    |     |                                 |       |          |          |          |       |
|----|-----|---------------------------------|-------|----------|----------|----------|-------|
| 29 | (2) | <i>Ditylum brightwellii</i>     | 18.00 | 2.67E+03 | 1.18E+05 | 2.81E-07 | 27.65 |
| 30 | (3) | <i>Scrippsiella sweeneyae</i>   | 21.00 | 1.69E+03 | 1.40E+04 | 4.84E-08 | 1.38  |
| 31 | (3) | <i>Thalassiosira floridana</i>  | 21.00 | 3.71E+01 | 4.00E+02 | 2.58E-08 | 13.82 |
| 32 | (3) | <i>Prorocentrum micans</i>      | 21.00 | 2.17E+03 | 1.00E+04 | 7.64E-08 | 1.38  |
| 33 | (3) | <i>Scrippsiella sweeneyae</i>   | 21.00 | 1.69E+03 | 1.40E+04 | 1.35E-07 | 6.91  |
| 34 | (3) | <i>Skeletonema costatum</i>     | 21.00 | 3.33E+01 | 3.50E+02 | 4.28E-09 | 0.69  |
| 35 | (3) | <i>Prorocentrum micans</i>      | 21.00 | 2.17E+03 | 1.00E+04 | 8.92E-08 | 2.76  |
| 36 | (3) | <i>Skeletonema costatum</i>     | 21.00 | 3.33E+01 | 3.50E+02 | 1.48E-08 | 13.82 |
| 37 | (3) | <i>Prorocentrum micans</i>      | 21.00 | 2.17E+03 | 1.00E+04 | 1.17E-07 | 6.91  |
| 38 | (3) | <i>Ceratium lineatum</i>        | 21.00 | 1.29E+02 | 9.00E+02 | 4.40E-09 | 13.82 |
| 39 | (3) | <i>Thalassiosira eccentrica</i> | 21.00 | 1.75E+03 | 2.50E+04 | 5.94E-07 | 2.76  |
| 40 | (3) | <i>Skeletonema costatum</i>     | 21.00 | 3.33E+01 | 3.50E+02 | 1.01E-08 | 1.38  |
| 41 | (3) | <i>Amphidinium carterae</i>     | 21.00 | 1.15E+02 | 8.00E+02 | 1.10E-08 | 6.91  |
| 42 | (3) | <i>Prorocentrum micans</i>      | 21.00 | 2.17E+03 | 1.00E+04 | 3.54E-08 | 22.12 |
| 43 | (3) | <i>Ceratium lineatum</i>        | 21.00 | 1.29E+02 | 9.00E+02 | 3.33E-09 | 0.69  |
| 44 | (3) | <i>Prorocentrum micans</i>      | 21.00 | 2.17E+03 | 1.00E+04 | 6.41E-08 | 0.69  |
| 45 | (3) | <i>Gymnodinium simplex</i>      | 21.00 | 5.49E+01 | 4.00E+02 | 2.04E-09 | 0.69  |
| 46 | (3) | <i>Scrippsiella sweeneyae</i>   | 21.00 | 1.69E+03 | 1.40E+04 | 1.22E-07 | 2.76  |
| 47 | (3) | <i>Thalassiosira floridana</i>  | 21.00 | 3.71E+01 | 4.00E+02 | 3.86E-09 | 0.69  |
| 48 | (3) | <i>Prorocentrum micans</i>      | 21.00 | 2.17E+03 | 1.00E+04 | 8.06E-08 | 13.82 |
| 49 | (3) | <i>Amphidinium carterae</i>     | 21.00 | 1.15E+02 | 8.00E+02 | 1.20E-08 | 2.76  |
| 50 | (3) | <i>Gymnodinium simplex</i>      | 21.00 | 5.49E+01 | 4.00E+02 | 7.88E-09 | 6.91  |
| 51 | (3) | <i>Amphidinium carterae</i>     | 21.00 | 1.15E+02 | 8.00E+02 | 1.01E-08 | 22.12 |
| 52 | (3) | <i>Cylindrotheca fusiformis</i> | 21.00 | 3.25E+01 | 3.20E+02 | 1.20E-08 | 2.76  |
| 53 | (3) | <i>Gymnodinium simplex</i>      | 21.00 | 5.49E+01 | 4.00E+02 | 7.06E-09 | 13.82 |
| 54 | (3) | <i>Thalassiosira floridana</i>  | 21.00 | 3.71E+01 | 4.00E+02 | 9.50E-09 | 2.76  |
| 55 | (3) | <i>Thalassiosira eccentrica</i> | 21.00 | 1.75E+03 | 2.50E+04 | 3.23E-07 | 1.38  |
| 56 | (3) | <i>Thalassiosira eccentrica</i> | 21.00 | 1.75E+03 | 2.50E+04 | 5.99E-07 | 6.91  |
| 57 | (3) | <i>Thalassiosira eccentrica</i> | 21.00 | 1.75E+03 | 2.50E+04 | 5.83E-07 | 13.82 |
| 58 | (3) | <i>Thalassiosira floridana</i>  | 21.00 | 3.71E+01 | 4.00E+02 | 2.58E-08 | 6.91  |

|    |     |                                 |       |          |          |          |       |
|----|-----|---------------------------------|-------|----------|----------|----------|-------|
| 59 | (3) | <i>Thalassiosira floridana</i>  | 21.00 | 3.71E+01 | 4.00E+02 | 2.62E−08 | 22.12 |
| 60 | (3) | <i>Thalassiosira eccentrica</i> | 21.00 | 1.75E+03 | 2.50E+04 | 1.63E−07 | 0.69  |
| 61 | (3) | <i>Thalassiosira eccentrica</i> | 21.00 | 1.75E+03 | 2.50E+04 | 9.40E−08 | 22.12 |
| 62 | (3) | <i>Amphidinium carterae</i>     | 21.00 | 1.15E+02 | 8.00E+02 | 8.74E−09 | 0.69  |
| 63 | (3) | <i>Amphidinium carterae</i>     | 21.00 | 1.15E+02 | 8.00E+02 | 9.47E−09 | 1.38  |
| 64 | (3) | <i>Amphidinium carterae</i>     | 21.00 | 1.15E+02 | 8.00E+02 | 1.23E−08 | 13.82 |
| 65 | (3) | <i>Gymnodinium simplex</i>      | 21.00 | 5.49E+01 | 4.00E+02 | 3.13E−09 | 1.38  |
| 66 | (3) | <i>Gymnodinium simplex</i>      | 21.00 | 5.49E+01 | 4.00E+02 | 5.48E−09 | 2.76  |
| 67 | (3) | <i>Gymnodinium simplex</i>      | 21.00 | 5.49E+01 | 4.00E+02 | 6.45E−09 | 22.12 |
| 68 | (3) | <i>Chaetoceros</i> sp.          | 21.00 | 5.14E+00 | 3.50E+01 | 8.02E−10 | 0.69  |
| 69 | (3) | <i>Chaetoceros</i> sp.          | 21.00 | 5.14E+00 | 3.50E+01 | 2.78E−09 | 22.12 |
| 70 | (3) | <i>Skeletonema costatum</i>     | 21.00 | 3.33E+01 | 3.50E+02 | 1.25E−08 | 2.76  |
| 71 | (3) | <i>Skeletonema costatum</i>     | 21.00 | 3.33E+01 | 3.50E+02 | 1.61E−08 | 6.91  |
| 72 | (3) | <i>Chaetoceros</i> sp.          | 21.00 | 5.14E+00 | 3.50E+01 | 1.29E−09 | 1.38  |
| 73 | (3) | <i>Chaetoceros</i> sp.          | 21.00 | 5.14E+00 | 3.50E+01 | 3.22E−09 | 6.91  |
| 74 | (3) | <i>Chaetoceros</i> sp.          | 21.00 | 5.14E+00 | 3.50E+01 | 3.52E−09 | 13.82 |
| 75 | (3) | <i>Skeletonema costatum</i>     | 21.00 | 3.33E+01 | 3.50E+02 | 1.21E−08 | 22.12 |
| 76 | (3) | <i>Cylindrotheca fusiformis</i> | 21.00 | 3.25E+01 | 3.20E+02 | 2.17E−08 | 13.82 |
| 77 | (3) | <i>Cylindrotheca fusiformis</i> | 21.00 | 3.25E+01 | 3.20E+02 | 1.80E−08 | 22.12 |
| 78 | (3) | <i>Thalassiosira floridana</i>  | 21.00 | 3.71E+01 | 4.00E+02 | 5.78E−09 | 1.38  |
| 79 | (3) | <i>Cylindrotheca fusiformis</i> | 21.00 | 3.25E+01 | 3.20E+02 | 5.93E−09 | 0.69  |
| 80 | (3) | <i>Cylindrotheca fusiformis</i> | 21.00 | 3.25E+01 | 3.20E+02 | 7.54E−09 | 1.38  |
| 81 | (3) | <i>Cylindrotheca fusiformis</i> | 21.00 | 3.25E+01 | 3.20E+02 | 1.54E−08 | 6.91  |
| 82 | (3) | <i>Scrippsiella sweeneyae</i>   | 21.00 | 1.69E+03 | 1.40E+04 | 2.48E−08 | 0.69  |
| 83 | (3) | <i>Chaetoceros</i> sp.          | 21.00 | 5.14E+00 | 3.50E+01 | 1.73E−09 | 2.76  |
| 84 | (3) | <i>Ceratium lineatum</i>        | 21.00 | 1.29E+02 | 9.00E+02 | 2.64E−09 | 2.76  |
| 85 | (3) | <i>Ceratium lineatum</i>        | 21.00 | 1.29E+02 | 9.00E+02 | 3.33E−09 | 6.91  |
| 86 | (3) | <i>Ceratium lineatum</i>        | 21.00 | 1.29E+02 | 9.00E+02 | 3.44E−09 | 1.38  |
| 87 | (4) | <i>Skeletonema costatum</i>     | 20.00 | 1.99E+01 | 1.70E+02 | 9.05E−09 | 64.80 |
| 88 | (4) | <i>Skeletonema costatum</i>     | 20.00 | 2.25E+01 | 1.10E+02 | 4.03E−09 | 5.62  |

|     |     |                                       |       |          |          |          |       |
|-----|-----|---------------------------------------|-------|----------|----------|----------|-------|
| 89  | (4) | <i>Skeletonema costatum</i>           | 20.00 | 3.48E+01 | 1.10E+02 | 3.81E−10 | 0.65  |
| 90  | (4) | <i>Skeletonema costatum</i>           | 20.00 | 2.10E+01 | 1.10E+02 | 8.25E−10 | 1.64  |
| 91  | (4) | <i>Skeletonema costatum</i>           | 20.00 | 2.07E+01 | 1.40E+02 | 1.36E−08 | 28.08 |
| 92  | (5) | <i>Brachiomonas</i> sp.               | 20.00 | 2.56E+02 | 1.87E+03 | 3.76E−08 | 6.91  |
| 93  | (5) | <i>Brachiomonas</i> sp.               | 20.00 | 2.80E+02 | 2.06E+03 | 9.94E−08 | 10.37 |
| 94  | (5) | <i>Brachiomonas</i> sp.               | 20.00 | 2.69E+02 | 1.98E+03 | 1.23E−07 | 20.30 |
| 95  | (5) | <i>Gyrodinium</i> cf. <i>aureolum</i> | 20.00 | 6.05E+02 | 4.68E+03 | 8.87E−09 | 1.51  |
| 96  | (5) | <i>Synechococcus</i> sp.              | 22.00 | 2.50E−01 | 1.39E−01 | 4.81E−11 | 7.34  |
| 97  | (5) | <i>Synechococcus</i> sp.              | 22.00 | 2.50E−01 | 1.39E−01 | 6.40E−11 | 9.50  |
| 98  | (5) | <i>Pycnococcus provasolii</i>         | 20.00 | 3.60E+00 | 2.00E+01 | 3.75E−10 | 12.10 |
| 99  | (5) | <i>Pycnococcus provasolii</i>         | 20.00 | 3.00E+00 | 1.65E+01 | 3.76E−10 | 22.46 |
| 100 | (5) | <i>Pycnococcus provasolii</i>         | 20.00 | 3.30E+00 | 1.82E+01 | 5.76E−10 | 31.97 |
| 101 | (5) | <i>Pycnococcus provasolii</i>         | 20.00 | 3.70E+00 | 2.06E+01 | 3.49E−10 | 5.62  |
| 102 | (5) | <i>Pycnococcus provasolii</i>         | 20.00 | 2.90E+00 | 1.59E+01 | 1.40E−10 | 2.16  |
| 103 | (5) | <i>Brachiomonas</i> sp.               | 20.00 | 2.23E+02 | 1.62E+03 | 7.70E−08 | 36.29 |
| 104 | (5) | <i>Gyrodinium</i> cf. <i>aureolum</i> | 20.00 | 6.82E+02 | 5.32E+03 | 2.21E−08 | 3.46  |
| 105 | (5) | <i>Gyrodinium</i> cf. <i>aureolum</i> | 20.00 | 6.90E+02 | 5.39E+03 | 2.10E−08 | 5.18  |
| 106 | (5) | <i>Brachiomonas</i> sp.               | 20.00 | 2.42E+02 | 1.77E+03 | 1.81E−08 | 2.59  |
| 107 | (5) | <i>Gyrodinium</i> cf. <i>aureolum</i> | 20.00 | 1.38E+03 | 1.13E+04 | 3.82E−08 | 16.42 |
| 108 | (5) | <i>Gyrodinium</i> cf. <i>aureolum</i> | 20.00 | 1.34E+03 | 1.09E+04 | 4.07E−08 | 10.15 |
| 109 | (5) | <i>Phaeocystis</i> sp.                | 15.00 | 1.42E+01 | 8.62E+01 | 7.32E−10 | 0.86  |
| 110 | (5) | <i>Phaeocystis</i> sp.                | 15.00 | 1.42E+01 | 8.62E+01 | 2.27E−09 | 4.19  |
| 111 | (5) | <i>Synechococcus</i> sp.              | 22.00 | 2.50E−01 | 1.39E−01 | 4.71E−11 | 4.75  |
| 112 | (5) | <i>Synechococcus</i> sp.              | 22.00 | 2.50E−01 | 1.39E−01 | 1.87E−11 | 2.42  |
| 113 | (5) | <i>Phaeocystis</i> sp.                | 15.00 | 1.42E+01 | 8.62E+01 | 1.80E−09 | 16.63 |
| 114 | (5) | <i>Phaeocystis</i> sp.                | 15.00 | 1.42E+01 | 8.62E+01 | 1.92E−09 | 9.72  |
| 115 | (5) | <i>Phaeocystis</i> sp.                | 15.00 | 1.42E+01 | 8.62E+01 | 1.80E−09 | 15.55 |
| 116 | (6) | <i>Dunaliella tertiolecta</i>         | 21.00 | 2.56E+01 | 2.53E+02 | 7.28E−09 | 19.42 |
| 117 | (6) | <i>Coccolithus huxlei</i>             | 21.00 | 3.35E+00 | 2.06E+01 | 9.08E−10 | 19.42 |
| 118 | (6) | <i>Syracosphaera elongata</i>         | 21.00 | 1.01E+02 | 1.38E+03 | 3.96E−08 | 19.42 |

|     |     |                                    |       |          |          |          |       |
|-----|-----|------------------------------------|-------|----------|----------|----------|-------|
| 119 | (6) | <i>Peridium trochoideum</i>        | 21.00 | 4.32E+02 | 8.25E+03 | 6.42E−08 | 19.42 |
| 120 | (6) | <i>Cyclotella nana</i>             | 21.00 | 2.28E+01 | 2.20E+02 | 6.32E−09 | 19.42 |
| 121 | (6) | <i>Skeletonema costatum</i>        | 21.00 | 3.03E+01 | 3.12E+02 | 1.04E−08 | 19.42 |
| 122 | (6) | <i>Thalassiosira rotula</i>        | 21.00 | 2.19E+02 | 3.58E+03 | 5.24E−08 | 19.42 |
| 123 | (6) | <i>Ditylum brightwellii</i>        | 21.00 | 1.39E+03 | 3.50E+04 | 1.66E−07 | 19.42 |
| 124 | (6) | <i>Coscinodiscus wailesii</i>      | 20.00 | 1.86E+05 | 1.46E+07 | 1.18E−05 | 19.42 |
| 125 | (6) | <i>Coscinodiscus asteromphilus</i> | 20.00 | 8.54E+03 | 3.27E+05 | 3.86E−07 | 19.42 |
| 126 | (6) | <i>Thalassiosira fluviatilis</i>   | 20.00 | 7.01E+02 | 1.50E+04 | 1.51E−07 | 11.93 |
| 127 | (6) | <i>Dunaliella tertiolecta</i>      | 21.00 | 3.39E+01 | 3.58E+02 | 1.26E−09 | 9.71  |
| 128 | (6) | <i>Dunaliella tertiolecta</i>      | 21.00 | 3.84E+01 | 4.18E+02 | 2.24E−09 | 19.42 |
| 129 | (6) | <i>Dunaliella tertiolecta</i>      | 21.00 | 2.83E+01 | 2.87E+02 | 2.22E−09 | 9.71  |
| 130 | (6) | <i>Dunaliella tertiolecta</i>      | 21.00 | 3.37E+01 | 3.56E+02 | 5.45E−09 | 19.42 |
| 131 | (6) | <i>Dunaliella tertiolecta</i>      | 21.00 | 2.33E+01 | 2.26E+02 | 1.46E−09 | 4.99  |
| 132 | (6) | <i>Dunaliella tertiolecta</i>      | 21.00 | 2.25E+01 | 2.16E+02 | 2.86E−09 | 9.71  |
| 133 | (6) | <i>Dunaliella tertiolecta</i>      | 21.00 | 2.61E+01 | 2.59E+02 | 5.40E−09 | 19.42 |
| 134 | (6) | <i>Dunaliella tertiolecta</i>      | 21.00 | 2.79E+01 | 2.82E+02 | 7.01E−09 | 19.42 |
| 135 | (6) | <i>Dunaliella tertiolecta</i>      | 21.00 | 2.56E+01 | 2.53E+02 | 7.28E−09 | 19.42 |
| 136 | (6) | <i>Dunaliella tertiolecta</i>      | 21.00 | 2.95E+01 | 3.01E+02 | 1.11E−08 | 38.84 |
| 137 | (6) | <i>Dunaliella tertiolecta</i>      | 21.00 | 2.94E+01 | 3.00E+02 | 1.60E−08 | 66.58 |
| 138 | (6) | <i>Dunaliella tertiolecta</i>      | 21.00 | 2.95E+01 | 2.25E+02 | 1.23E−08 | 19.42 |
| 139 | (7) | <i>Phaeodactylum tricornutum</i>   | 14.00 | 1.14E+00 | 5.46E+00 | 2.02E−10 | 10.48 |
| 140 | (7) | <i>Phaeodactylum tricornutum</i>   | 16.00 | 1.18E+00 | 5.72E+00 | 1.39E−10 | 1.21  |
| 141 | (7) | <i>Phaeodactylum tricornutum</i>   | 16.00 | 1.60E+00 | 8.27E+00 | 4.70E−11 | 0.35  |
| 142 | (7) | <i>Phaeodactylum tricornutum</i>   | 16.00 | 1.30E+00 | 6.39E+00 | 3.32E−10 | 10.48 |
| 143 | (7) | <i>Phaeodactylum tricornutum</i>   | 16.00 | 1.38E+00 | 6.92E+00 | 2.38E−10 | 5.90  |
| 144 | (7) | <i>Phaeodactylum tricornutum</i>   | 25.00 | 1.70E+00 | 8.94E+00 | 4.86E−10 | 10.48 |
| 145 | (7) | <i>Phaeodactylum tricornutum</i>   | 21.00 | 1.75E+00 | 9.28E+00 | 5.18E−10 | 10.48 |
| 146 | (7) | <i>Phaeodactylum tricornutum</i>   | 19.00 | 1.20E+00 | 5.82E+00 | 1.73E−10 | 1.21  |
| 147 | (7) | <i>Phaeodactylum tricornutum</i>   | 14.00 | 1.18E+00 | 5.67E+00 | 1.18E−10 | 2.72  |
| 148 | (7) | <i>Phaeodactylum tricornutum</i>   | 21.00 | 1.19E+00 | 5.74E+00 | 1.58E−10 | 1.21  |

|     |     |                                  |       |          |          |          |       |
|-----|-----|----------------------------------|-------|----------|----------|----------|-------|
| 149 | (7) | <i>Phaeodactylum tricornutum</i> | 23.00 | 1.74E+00 | 9.23E+00 | 5.86E−10 | 5.90  |
| 150 | (7) | <i>Phaeodactylum tricornutum</i> | 25.00 | 1.61E+00 | 8.37E+00 | 3.82E−11 | 0.35  |
| 151 | (7) | <i>Phaeodactylum tricornutum</i> | 14.00 | 1.15E+00 | 5.54E+00 | 2.22E−11 | 0.35  |
| 152 | (7) | <i>Phaeodactylum tricornutum</i> | 25.00 | 2.03E+00 | 1.11E+01 | 5.09E−10 | 5.90  |
| 153 | (7) | <i>Phaeodactylum tricornutum</i> | 16.00 | 1.18E+00 | 5.72E+00 | 1.84E−10 | 2.72  |
| 154 | (7) | <i>Phaeodactylum tricornutum</i> | 14.00 | 1.43E+00 | 7.21E+00 | 1.97E−10 | 5.90  |
| 155 | (7) | <i>Phaeodactylum tricornutum</i> | 19.00 | 1.58E+00 | 8.18E+00 | 4.56E−10 | 5.90  |
| 156 | (7) | <i>Phaeodactylum tricornutum</i> | 14.00 | 1.18E+00 | 5.67E+00 | 1.17E−10 | 1.21  |
| 157 | (7) | <i>Phaeodactylum tricornutum</i> | 19.00 | 1.68E+00 | 8.80E+00 | 5.81E−10 | 10.48 |
| 158 | (7) | <i>Phaeodactylum tricornutum</i> | 21.00 | 1.59E+00 | 8.24E+00 | 3.65E−10 | 5.90  |
| 159 | (7) | <i>Phaeodactylum tricornutum</i> | 19.00 | 1.20E+00 | 5.82E+00 | 2.07E−10 | 2.72  |
| 160 | (7) | <i>Phaeodactylum tricornutum</i> | 23.00 | 2.28E+00 | 1.28E+01 | 3.13E−10 | 1.21  |
| 161 | (7) | <i>Phaeodactylum tricornutum</i> | 21.00 | 1.19E+00 | 5.74E+00 | 2.10E−10 | 2.72  |
| 162 | (7) | <i>Phaeodactylum tricornutum</i> | 23.00 | 2.28E+00 | 1.28E+01 | 4.35E−10 | 2.72  |
| 163 | (7) | <i>Phaeodactylum tricornutum</i> | 23.00 | 1.59E+00 | 8.25E+00 | 4.50E−11 | 0.35  |
| 164 | (7) | <i>Phaeodactylum tricornutum</i> | 25.00 | 3.01E+00 | 1.81E+01 | 4.32E−10 | 2.72  |
| 165 | (7) | <i>Phaeodactylum tricornutum</i> | 23.00 | 2.26E+00 | 1.27E+01 | 8.27E−10 | 10.48 |
| 166 | (7) | <i>Phaeodactylum tricornutum</i> | 21.00 | 1.19E+00 | 5.79E+00 | 3.24E−11 | 0.35  |
| 167 | (7) | <i>Phaeodactylum tricornutum</i> | 19.00 | 1.19E+00 | 5.73E+00 | 3.49E−11 | 0.35  |
| 168 | (7) | <i>Phaeodactylum tricornutum</i> | 25.00 | 3.01E+00 | 1.81E+01 | 3.56E−10 | 1.21  |
| 169 | (8) |                                  | 20.00 | 5.81E+00 | 4.91E+01 | 5.14E−10 | 1.08  |
| 170 | (8) |                                  | 20.00 | 1.97E+04 | 2.27E+05 | 2.08E−07 | 1.08  |
| 171 | (8) |                                  | 20.00 | 2.16E+04 | 2.50E+05 | 2.62E−07 | 1.08  |
| 172 | (8) |                                  | 20.00 | 7.28E+02 | 7.40E+03 | 2.21E−08 | 1.08  |
| 173 | (8) |                                  | 20.00 | 2.09E+00 | 1.70E+01 | 2.42E−10 | 1.08  |
| 174 | (8) |                                  | 20.00 | 1.47E+01 | 1.29E+02 | 1.14E−09 | 1.08  |
| 175 | (8) |                                  | 20.00 | 2.08E+02 | 2.01E+03 | 1.62E−08 | 1.08  |
| 176 | (8) |                                  | 20.00 | 1.93E+03 | 2.04E+04 | 2.88E−08 | 1.08  |
| 177 | (9) | <i>Gyrodinium cf. aureolum</i>   | 20.00 | 1.89E+03 | 7.17E+03 | 5.39E−08 | 13.39 |
| 178 | (9) | <i>Gyrodinium cf. aureolum</i>   | 20.00 | 9.07E+02 | 5.56E+03 | 2.93E−08 | 2.59  |

|     |      |                             |       |          |          |          |       |
|-----|------|-----------------------------|-------|----------|----------|----------|-------|
| 179 | (9)  | Gyrodinium cf. aureolum     | 20.00 | 1.19E+03 | 6.01E+03 | 2.76E−08 | 7.34  |
| 180 | (9)  | Gyrodinium cf. aureolum     | 20.00 | 7.84E+02 | 6.12E+03 | 2.99E−08 | 8.64  |
| 181 | (9)  | Gyrodinium cf. aureolum     | 20.00 | 1.38E+03 | 6.11E+03 | 3.82E−08 | 16.42 |
| 182 | (9)  | Gyrodinium cf. aureolum     | 20.00 | 1.24E+03 | 6.06E+03 | 4.60E−08 | 11.66 |
| 183 | (9)  | Gyrodinium cf. aureolum     | 20.00 | 6.82E+02 | 5.79E+03 | 2.21E−08 | 3.46  |
| 184 | (9)  | Gyrodinium cf. aureolum     | 20.00 | 1.34E+03 | 5.79E+03 | 4.07E−08 | 10.15 |
| 185 | (9)  | Gyrodinium cf. aureolum     | 20.00 | 1.24E+03 | 5.79E+03 | 6.41E−09 | 0.65  |
| 186 | (9)  | Gyrodinium cf. aureolum     | 20.00 | 2.01E+03 | 5.14E+03 | 4.30E−08 | 1.73  |
| 187 | (9)  | Gyrodinium cf. aureolum     | 20.00 | 1.40E+03 | 6.57E+03 | 4.38E−08 | 9.50  |
| 188 | (9)  | Gyrodinium cf. aureolum     | 20.00 | 1.72E+03 | 7.08E+03 | 5.08E−08 | 16.85 |
| 189 | (9)  | Gyrodinium cf. aureolum     | 20.00 | 1.24E+03 | 5.79E+03 | 2.98E−08 | 2.16  |
| 190 | (9)  | Gyrodinium cf. aureolum     | 20.00 | 2.36E+03 | 4.49E+03 | 3.08E−08 | 1.21  |
| 191 | (9)  | Gyrodinium cf. aureolum     | 20.00 | 9.88E+02 | 5.48E+03 | 3.19E−08 | 4.75  |
| 192 | (9)  | Gyrodinium cf. aureolum     | 20.00 | 6.89E+02 | 5.93E+03 | 2.10E−08 | 5.18  |
| 193 | (9)  | Gyrodinium cf. aureolum     | 20.00 | 6.27E+02 | 5.66E+03 | 1.79E−08 | 19.01 |
| 194 | (9)  | Gyrodinium cf. aureolum     | 20.00 | 6.05E+02 | 3.62E+03 | 8.87E−09 | 1.51  |
| 195 | (10) | Phaeodactylum tricornutum   | 23.00 | 1.06E+01 | 8.54E+01 | 3.65E−09 | 19.87 |
| 196 | (10) | Phaeodactylum tricornutum   | 23.00 | 1.07E+01 | 8.64E+01 | 3.69E−09 | 19.87 |
| 197 | (10) | Phaeodactylum tricornutum   | 23.00 | 1.23E+01 | 1.03E+02 | 4.67E−10 | 1.21  |
| 198 | (10) | Phaeodactylum tricornutum   | 23.00 | 8.10E+00 | 6.13E+01 | 1.59E−10 | 0.60  |
| 199 | (10) | Phaeodactylum tricornutum   | 23.00 | 8.30E+00 | 6.31E+01 | 7.74E−10 | 2.59  |
| 200 | (10) | Phaeodactylum tricornutum   | 23.00 | 1.24E+01 | 1.04E+02 | 3.43E−09 | 11.23 |
| 201 | (10) | Phaeodactylum tricornutum   | 23.00 | 1.03E+01 | 8.24E+01 | 2.06E−09 | 5.18  |
| 202 | (10) | Phaeodactylum tricornutum   | 23.00 | 8.00E+00 | 6.03E+01 | 1.66E−10 | 0.60  |
| 203 | (10) | Phaeodactylum tricornutum   | 23.00 | 1.24E+01 | 1.04E+02 | 4.27E−09 | 17.28 |
| 204 | (11) | Synechococcus A2169 strain  | 23.00 | 1.78E−01 | 9.56E−01 | 5.76E−12 | 2.52  |
| 205 | (11) | Synechococcus A2169 strain  | 23.00 | 1.78E−01 | 9.56E−01 | 1.53E−11 | 2.52  |
| 206 | (11) | Synechococcus WH7803 strain | 23.00 | 1.78E−01 | 9.56E−01 | 1.63E−11 | 2.52  |
| 207 | (11) | Synechococcus WH7803 strain | 23.00 | 1.78E−01 | 9.56E−01 | 1.92E−11 | 2.52  |
| 208 | (11) | Synechococcus A2169 strain  | 23.00 | 1.78E−01 | 9.56E−01 | 1.11E−11 | 2.52  |

|     |      |                                    |       |          |          |          |       |
|-----|------|------------------------------------|-------|----------|----------|----------|-------|
| 209 | (11) | <i>Synechococcus</i> WH7803 strain | 23.00 | 1.78E-01 | 9.56E-01 | 1.06E-11 | 2.52  |
| 210 | (11) | <i>Synechococcus</i> A2169 strain  | 23.00 | 1.78E-01 | 9.56E-01 | 6.00E-12 | 2.52  |
| 211 | (11) | <i>Synechococcus</i> WH7803 strain | 23.00 | 1.78E-01 | 9.56E-01 | 1.08E-11 | 2.52  |
| 212 | (12) | <i>Thalassiosira weissflogii</i>   | 20.00 | 2.99E+02 | 1.43E+03 | 3.99E-08 | 0.68  |
| 213 | (12) | <i>Isochrysis</i> sp.              | 15.00 | 6.97E+00 | 8.50E+01 | 3.25E-10 | 0.23  |
| 214 | (12) | <i>Isochrysis</i> sp.              | 10.00 | 6.97E+00 | 8.50E+01 | 3.94E-10 | 0.23  |
| 215 | (12) | <i>Chroomonas salina</i>           | 25.00 | 3.24E+01 | 2.45E+02 | 1.32E-09 | 0.70  |
| 216 | (12) | <i>Chroomonas salina</i>           | 25.00 | 3.24E+01 | 2.45E+02 | 1.83E-09 | 0.23  |
| 217 | (12) | <i>Isochrysis</i> sp.              | 10.00 | 6.97E+00 | 8.50E+01 | 2.83E-10 | 16.21 |
| 218 | (12) | <i>Chroomonas salina</i>           | 10.00 | 3.24E+01 | 2.45E+02 | 6.31E-11 | 0.13  |
| 219 | (12) | <i>Isochrysis</i> sp.              | 25.00 | 6.97E+00 | 8.50E+01 | 5.59E-10 | 1.18  |
| 220 | (12) | <i>Chroomonas salina</i>           | 25.00 | 3.24E+01 | 2.45E+02 | 1.40E-09 | 1.79  |
| 221 | (12) | <i>Isochrysis</i> sp.              | 10.00 | 6.97E+00 | 8.50E+01 | 6.52E-10 | 0.98  |
| 222 | (12) | <i>Isochrysis</i> sp.              | 10.00 | 6.97E+00 | 8.50E+01 | 3.01E-10 | 1.79  |
| 223 | (12) | <i>Isochrysis</i> sp.              | 10.00 | 6.97E+00 | 8.50E+01 | 2.83E-10 | 0.70  |
| 224 | (12) | <i>Isochrysis</i> sp.              | 10.00 | 6.97E+00 | 8.50E+01 | 5.83E-10 | 2.21  |
| 225 | (12) | <i>Isochrysis</i> sp.              | 25.00 | 6.97E+00 | 8.50E+01 | 4.27E-10 | 0.08  |
| 226 | (12) | <i>Isochrysis</i> sp.              | 10.00 | 6.97E+00 | 8.50E+01 | 5.83E-10 | 2.85  |
| 227 | (12) | <i>Isochrysis</i> sp.              | 25.00 | 6.97E+00 | 8.50E+01 | 1.43E-09 | 0.70  |
| 228 | (12) | <i>Thalassiosira weissflogii</i>   | 20.00 | 2.99E+02 | 1.43E+03 | 6.42E-08 | 16.27 |
| 229 | (12) | <i>Thalassiosira weissflogii</i>   | 15.00 | 2.99E+02 | 1.43E+03 | 2.91E-08 | 16.30 |
| 230 | (12) | <i>Thalassiosira weissflogii</i>   | 20.00 | 2.99E+02 | 1.43E+03 | 3.00E-08 | 1.76  |
| 231 | (12) | <i>Thalassiosira weissflogii</i>   | 20.00 | 2.99E+02 | 1.43E+03 | 8.38E-08 | 2.09  |
| 232 | (12) | <i>Thalassiosira weissflogii</i>   | 20.00 | 2.99E+02 | 1.43E+03 | 8.42E-08 | 6.35  |
| 233 | (12) | <i>Thalassiosira weissflogii</i>   | 15.00 | 2.99E+02 | 1.43E+03 | 2.11E-08 | 0.68  |
| 234 | (12) | <i>Thalassiosira weissflogii</i>   | 15.00 | 2.99E+02 | 1.43E+03 | 1.50E-08 | 1.78  |
| 235 | (12) | <i>Isochrysis</i> sp.              | 20.00 | 6.97E+00 | 8.50E+01 | 1.93E-09 | 7.22  |
| 236 | (12) | <i>Thalassiosira weissflogii</i>   | 15.00 | 2.99E+02 | 1.43E+03 | 2.60E-08 | 7.19  |
| 237 | (12) | <i>Thalassiosira weissflogii</i>   | 15.00 | 2.99E+02 | 1.43E+03 | 2.06E-08 | 0.51  |
| 238 | (12) | <i>Thalassiosira weissflogii</i>   | 15.00 | 2.99E+02 | 1.43E+03 | 1.36E-08 | 0.19  |



|     |      |                                  |       |          |          |          |       |
|-----|------|----------------------------------|-------|----------|----------|----------|-------|
| 239 | (12) | <i>Chroomonas salina</i>         | 25.00 | 3.24E+01 | 2.45E+02 | 7.09E−10 | 0.10  |
| 240 | (12) | <i>Thalassiosira weissflogii</i> | 25.00 | 2.99E+02 | 1.43E+03 | 6.12E−08 | 0.97  |
| 241 | (12) | <i>Thalassiosira weissflogii</i> | 25.00 | 2.99E+02 | 1.43E+03 | 1.21E−07 | 2.75  |
| 242 | (12) | <i>Thalassiosira weissflogii</i> | 25.00 | 2.99E+02 | 1.43E+03 | 1.21E−07 | 7.07  |
| 243 | (12) | <i>Thalassiosira weissflogii</i> | 15.00 | 2.99E+02 | 1.43E+03 | 1.12E−08 | 0.14  |
| 244 | (12) | <i>Isochrysis</i> sp.            | 25.00 | 6.97E+00 | 8.50E+01 | 2.81E−09 | 0.41  |
| 245 | (12) | <i>Thalassiosira weissflogii</i> | 25.00 | 2.99E+02 | 1.43E+03 | 3.11E−08 | 1.73  |
| 246 | (12) | <i>Thalassiosira weissflogii</i> | 20.00 | 2.99E+02 | 1.43E+03 | 2.86E−08 | 0.41  |
| 247 | (12) | <i>Isochrysis</i> sp.            | 25.00 | 6.97E+00 | 8.50E+01 | 7.06E−10 | 2.17  |
| 248 | (12) | <i>Thalassiosira weissflogii</i> | 20.00 | 2.99E+02 | 1.43E+03 | 3.44E−08 | 0.23  |
| 249 | (12) | <i>Thalassiosira weissflogii</i> | 20.00 | 2.99E+02 | 1.43E+03 | 2.63E−08 | 0.11  |
| 250 | (12) | <i>Thalassiosira weissflogii</i> | 20.00 | 2.99E+02 | 1.43E+03 | 4.34E−08 | 2.75  |
| 251 | (12) | <i>Thalassiosira weissflogii</i> | 20.00 | 2.99E+02 | 1.43E+03 | 5.25E−08 | 0.95  |
| 252 | (12) | <i>Isochrysis</i> sp.            | 10.00 | 6.97E+00 | 8.50E+01 | 1.52E−10 | 0.10  |
| 253 | (12) | <i>Isochrysis</i> sp.            | 15.00 | 6.97E+00 | 8.50E+01 | 5.86E−10 | 0.72  |
| 254 | (12) | <i>Thalassiosira weissflogii</i> | 25.00 | 2.99E+02 | 1.43E+03 | 5.32E−08 | 0.67  |
| 255 | (12) | <i>Thalassiosira weissflogii</i> | 20.00 | 2.99E+02 | 1.43E+03 | 3.66E−08 | 7.20  |
| 256 | (12) | <i>Isochrysis</i> sp.            | 20.00 | 6.97E+00 | 8.50E+01 | 1.91E−09 | 6.49  |
| 257 | (12) | <i>Isochrysis</i> sp.            | 20.00 | 6.97E+00 | 8.50E+01 | 2.56E−09 | 16.36 |
| 258 | (12) | <i>Isochrysis</i> sp.            | 15.00 | 6.97E+00 | 8.50E+01 | 8.23E−10 | 7.25  |
| 259 | (12) | <i>Isochrysis</i> sp.            | 15.00 | 6.97E+00 | 8.50E+01 | 1.17E−09 | 2.22  |
| 260 | (12) | <i>Isochrysis</i> sp.            | 15.00 | 6.97E+00 | 8.50E+01 | 9.42E−10 | 6.56  |
| 261 | (12) | <i>Isochrysis</i> sp.            | 15.00 | 6.97E+00 | 8.50E+01 | 1.31E−10 | 1.79  |
| 262 | (12) | <i>Isochrysis</i> sp.            | 15.00 | 6.97E+00 | 8.50E+01 | 7.95E−10 | 1.05  |
| 263 | (12) | <i>Isochrysis</i> sp.            | 15.00 | 6.97E+00 | 8.50E+01 | 6.35E−10 | 2.87  |
| 264 | (12) | <i>Isochrysis</i> sp.            | 15.00 | 6.97E+00 | 8.50E+01 | 5.38E−10 | 0.46  |
| 265 | (12) | <i>Isochrysis</i> sp.            | 25.00 | 6.97E+00 | 8.50E+01 | 6.75E−09 | 1.02  |
| 266 | (12) | <i>Isochrysis</i> sp.            | 20.00 | 6.97E+00 | 8.50E+01 | 1.01E−09 | 1.14  |
| 267 | (12) | <i>Isochrysis</i> sp.            | 25.00 | 6.97E+00 | 8.50E+01 | 6.78E−09 | 2.92  |
| 268 | (12) | <i>Isochrysis</i> sp.            | 25.00 | 6.97E+00 | 8.50E+01 | 3.68E−10 | 0.22  |

|     |      |                                  |       |          |          |          |       |
|-----|------|----------------------------------|-------|----------|----------|----------|-------|
| 269 | (12) | <i>Chroomonas salina</i>         | 25.00 | 3.24E+01 | 2.45E+02 | 2.71E−09 | 7.15  |
| 270 | (12) | <i>Isochrysis</i> sp.            | 25.00 | 6.97E+00 | 8.50E+01 | 1.40E−09 | 1.76  |
| 271 | (12) | <i>Isochrysis</i> sp.            | 20.00 | 6.97E+00 | 8.50E+01 | 1.18E−09 | 0.71  |
| 272 | (12) | <i>Isochrysis</i> sp.            | 20.00 | 6.97E+00 | 8.50E+01 | 1.67E−09 | 1.81  |
| 273 | (12) | <i>Isochrysis</i> sp.            | 20.00 | 6.97E+00 | 8.50E+01 | 1.21E−09 | 0.98  |
| 274 | (12) | <i>Isochrysis</i> sp.            | 25.00 | 6.97E+00 | 8.50E+01 | 6.74E−09 | 7.27  |
| 275 | (12) | <i>Isochrysis</i> sp.            | 25.00 | 6.97E+00 | 8.50E+01 | 9.10E−10 | 16.29 |
| 276 | (12) | <i>Isochrysis</i> sp.            | 20.00 | 6.97E+00 | 8.50E+01 | 1.14E−09 | 0.22  |
| 277 | (12) | <i>Thalassiosira weissflogii</i> | 25.00 | 2.99E+02 | 1.43E+03 | 5.14E−08 | 0.22  |
| 278 | (12) | <i>Isochrysis</i> sp.            | 10.00 | 6.97E+00 | 8.50E+01 | 4.33E−10 | 6.48  |
| 279 | (12) | <i>Thalassiosira weissflogii</i> | 15.00 | 2.99E+02 | 1.43E+03 | 2.09E−08 | 0.96  |
| 280 | (12) | <i>Thalassiosira weissflogii</i> | 25.00 | 2.99E+02 | 1.43E+03 | 4.28E−08 | 0.44  |
| 281 | (12) | <i>Isochrysis</i> sp.            | 20.00 | 6.97E+00 | 8.50E+01 | 6.36E−10 | 0.09  |
| 282 | (12) | <i>Chroomonas salina</i>         | 15.00 | 3.24E+01 | 2.45E+02 | 2.80E−09 | 0.50  |
| 283 | (12) | <i>Chroomonas salina</i>         | 25.00 | 3.24E+01 | 2.45E+02 | 1.92E−09 | 1.09  |
| 284 | (12) | <i>Isochrysis</i> sp.            | 15.00 | 6.97E+00 | 8.50E+01 | 1.07E−09 | 16.27 |
| 285 | (12) | <i>Isochrysis</i> sp.            | 15.00 | 6.97E+00 | 8.50E+01 | 8.23E−10 | 1.14  |
| 286 | (12) | <i>Chroomonas salina</i>         | 20.00 | 3.24E+01 | 2.45E+02 | 2.32E−09 | 0.45  |
| 287 | (12) | <i>Thalassiosira weissflogii</i> | 20.00 | 2.99E+02 | 1.43E+03 | 4.36E−08 | 1.08  |
| 288 | (12) | <i>Chroomonas salina</i>         | 10.00 | 3.24E+01 | 2.45E+02 | 3.45E−09 | 7.21  |
| 289 | (12) | <i>Chroomonas salina</i>         | 10.00 | 3.24E+01 | 2.45E+02 | 1.57E−09 | 2.31  |
| 290 | (12) | <i>Chroomonas salina</i>         | 10.00 | 3.24E+01 | 2.45E+02 | 2.46E−09 | 1.06  |
| 291 | (12) | <i>Chroomonas salina</i>         | 10.00 | 3.24E+01 | 2.45E+02 | 3.50E−09 | 2.90  |
| 292 | (12) | <i>Chroomonas salina</i>         | 10.00 | 3.24E+01 | 2.45E+02 | 1.17E−09 | 6.60  |
| 293 | (12) | <i>Chroomonas salina</i>         | 15.00 | 3.24E+01 | 2.45E+02 | 4.05E−09 | 16.27 |
| 294 | (12) | <i>Isochrysis</i> sp.            | 25.00 | 6.97E+00 | 8.50E+01 | 9.09E−10 | 6.50  |
| 295 | (12) | <i>Thalassiosira weissflogii</i> | 15.00 | 2.99E+02 | 1.43E+03 | 3.45E−08 | 1.18  |
| 296 | (12) | <i>Thalassiosira weissflogii</i> | 25.00 | 2.99E+02 | 1.43E+03 | 3.39E−08 | 1.07  |
| 297 | (12) | <i>Chroomonas salina</i>         | 10.00 | 3.24E+01 | 2.45E+02 | 2.74E−09 | 0.53  |
| 298 | (12) | <i>Chroomonas salina</i>         | 20.00 | 3.24E+01 | 2.45E+02 | 1.21E−09 | 0.12  |

|     |      |                                  |       |          |          |          |       |
|-----|------|----------------------------------|-------|----------|----------|----------|-------|
| 299 | (12) | <i>Isochrysis</i> sp.            | 10.00 | 6.97E+00 | 8.50E+01 | 4.13E−10 | 1.09  |
| 300 | (12) | <i>Thalassiosira weissflogii</i> | 15.00 | 2.99E+02 | 1.43E+03 | 4.11E−08 | 2.19  |
| 301 | (12) | <i>Isochrysis</i> sp.            | 20.00 | 6.97E+00 | 8.50E+01 | 1.41E−09 | 2.85  |
| 302 | (12) | <i>Isochrysis</i> sp.            | 20.00 | 6.97E+00 | 8.50E+01 | 5.87E−10 | 0.45  |
| 303 | (12) | <i>Chroomonas salina</i>         | 25.00 | 3.24E+01 | 2.45E+02 | 2.20E−09 | 0.41  |
| 304 | (12) | <i>Thalassiosira weissflogii</i> | 25.00 | 2.99E+02 | 1.43E+03 | 5.33E−07 | 6.21  |
| 305 | (12) | <i>Thalassiosira weissflogii</i> | 15.00 | 2.99E+02 | 1.43E+03 | 1.99E−08 | 2.84  |
| 306 | (12) | <i>Thalassiosira weissflogii</i> | 25.00 | 2.99E+02 | 1.43E+03 | 2.52E−07 | 16.11 |
| 307 | (12) | <i>Chroomonas salina</i>         | 25.00 | 3.24E+01 | 2.45E+02 | 2.01E−09 | 6.48  |
| 308 | (12) | <i>Thalassiosira weissflogii</i> | 25.00 | 2.99E+02 | 1.43E+03 | 3.09E−07 | 2.05  |
| 309 | (12) | <i>Thalassiosira weissflogii</i> | 15.00 | 2.99E+02 | 1.43E+03 | 2.76E−08 | 6.42  |
| 310 | (12) | <i>Chroomonas salina</i>         | 10.00 | 3.24E+01 | 2.45E+02 | 1.60E−09 | 16.30 |
| 311 | (12) | <i>Isochrysis</i> sp.            | 20.00 | 6.97E+00 | 8.50E+01 | 1.70E−09 | 2.21  |
| 312 | (12) | <i>Chroomonas salina</i>         | 25.00 | 3.24E+01 | 2.45E+02 | 1.32E−09 | 16.21 |
| 313 | (12) | <i>Isochrysis</i> sp.            | 10.00 | 6.97E+00 | 8.50E+01 | 4.74E−10 | 0.41  |
| 314 | (12) | <i>Chroomonas salina</i>         | 20.00 | 3.24E+01 | 2.45E+02 | 4.36E−09 | 1.11  |
| 315 | (12) | <i>Thalassiosira weissflogii</i> | 25.00 | 2.99E+02 | 1.43E+03 | 2.29E−08 | 0.11  |
| 316 | (12) | <i>Chroomonas salina</i>         | 10.00 | 3.24E+01 | 2.45E+02 | 1.72E−09 | 1.80  |
| 317 | (12) | <i>Chroomonas salina</i>         | 20.00 | 3.24E+01 | 2.45E+02 | 7.65E−09 | 7.13  |
| 318 | (12) | <i>Chroomonas salina</i>         | 20.00 | 3.24E+01 | 2.45E+02 | 7.73E−09 | 2.20  |
| 319 | (12) | <i>Chroomonas salina</i>         | 15.00 | 3.24E+01 | 2.45E+02 | 2.49E−09 | 0.73  |
| 320 | (12) | <i>Chroomonas salina</i>         | 20.00 | 3.24E+01 | 2.45E+02 | 3.01E−09 | 1.79  |
| 321 | (12) | <i>Chroomonas salina</i>         | 20.00 | 3.24E+01 | 2.45E+02 | 5.25E−09 | 1.00  |
| 322 | (12) | <i>Chroomonas salina</i>         | 20.00 | 3.24E+01 | 2.45E+02 | 3.23E−09 | 2.87  |
| 323 | (12) | <i>Chroomonas salina</i>         | 15.00 | 3.24E+01 | 2.45E+02 | 3.92E−09 | 1.08  |
| 324 | (12) | <i>Chroomonas salina</i>         | 15.00 | 3.24E+01 | 2.45E+02 | 3.83E−09 | 2.93  |
| 325 | (12) | <i>Chroomonas salina</i>         | 20.00 | 3.24E+01 | 2.45E+02 | 7.59E−09 | 6.45  |
| 326 | (12) | <i>Chroomonas salina</i>         | 20.00 | 3.24E+01 | 2.45E+02 | 7.72E−09 | 16.12 |
| 327 | (12) | <i>Chroomonas salina</i>         | 15.00 | 3.24E+01 | 2.45E+02 | 1.58E−09 | 0.25  |
| 328 | (12) | <i>Chroomonas salina</i>         | 25.00 | 3.24E+01 | 2.45E+02 | 2.71E−09 | 2.21  |

|     |      |                                  |       |          |          |          |       |
|-----|------|----------------------------------|-------|----------|----------|----------|-------|
| 329 | (12) | <i>Isochrysis</i> sp.            | 10.00 | 6.97E+00 | 8.50E+01 | 5.83E−10 | 7.15  |
| 330 | (12) | <i>Chroomonas salina</i>         | 20.00 | 3.24E+01 | 2.45E+02 | 1.38E−09 | 0.23  |
| 331 | (12) | <i>Chroomonas salina</i>         | 25.00 | 3.24E+01 | 2.45E+02 | 3.03E−09 | 0.98  |
| 332 | (12) | <i>Chroomonas salina</i>         | 10.00 | 3.24E+01 | 2.45E+02 | 3.18E−09 | 1.25  |
| 333 | (12) | <i>Chroomonas salina</i>         | 25.00 | 3.24E+01 | 2.45E+02 | 2.71E−09 | 2.85  |
| 334 | (12) | <i>Isochrysis</i> sp.            | 15.00 | 6.97E+00 | 8.50E+01 | 1.80E−10 | 0.12  |
| 335 | (12) | <i>Chroomonas salina</i>         | 20.00 | 3.24E+01 | 2.45E+02 | 2.54E−09 | 0.71  |
| 336 | (12) | <i>Chroomonas salina</i>         | 15.00 | 3.24E+01 | 2.45E+02 | 1.15E−09 | 0.11  |
| 337 | (12) | <i>Chroomonas salina</i>         | 15.00 | 3.24E+01 | 2.45E+02 | 3.27E−09 | 1.22  |
| 338 | (12) | <i>Chroomonas salina</i>         | 15.00 | 3.24E+01 | 2.45E+02 | 2.99E−09 | 1.84  |
| 339 | (12) | <i>Chroomonas salina</i>         | 15.00 | 3.24E+01 | 2.45E+02 | 4.51E−09 | 7.28  |
| 340 | (12) | <i>Chroomonas salina</i>         | 15.00 | 3.24E+01 | 2.45E+02 | 7.74E−09 | 2.30  |
| 341 | (12) | <i>Chroomonas salina</i>         | 10.00 | 3.24E+01 | 2.45E+02 | 1.48E−09 | 0.75  |
| 342 | (12) | <i>Chroomonas salina</i>         | 10.00 | 3.24E+01 | 2.45E+02 | 1.21E−09 | 0.24  |
| 343 | (12) | <i>Chroomonas salina</i>         | 15.00 | 3.24E+01 | 2.45E+02 | 5.81E−09 | 6.58  |
| 344 | (13) | <i>Rhizosolenia fragilissima</i> | 25.00 | 4.61E+01 | 5.24E+02 | 5.50E−09 | 7.57  |
| 345 | (13) | <i>Rhizosolenia fragilissima</i> | 12.00 | 4.61E+01 | 5.24E+02 | 4.23E−09 | 15.14 |
| 346 | (13) | <i>Rhizosolenia fragilissima</i> | 18.00 | 4.61E+01 | 5.24E+02 | 4.67E−09 | 15.14 |
| 347 | (13) | <i>Rhizosolenia fragilissima</i> | 12.00 | 4.61E+01 | 5.24E+02 | 5.86E−09 | 7.57  |
| 348 | (13) | <i>Rhizosolenia fragilissima</i> | 9.00  | 4.61E+01 | 5.24E+02 | 2.23E−09 | 7.57  |
| 349 | (13) | <i>Rhizosolenia fragilissima</i> | 9.00  | 4.61E+01 | 5.24E+02 | 3.45E−09 | 22.71 |
| 350 | (13) | <i>Rhizosolenia fragilissima</i> | 30.00 | 4.61E+01 | 5.24E+02 | 2.43E−09 | 15.14 |
| 351 | (13) | <i>Rhizosolenia fragilissima</i> | 25.00 | 4.61E+01 | 5.24E+02 | 5.71E−09 | 15.14 |
| 352 | (13) | <i>Rhizosolenia fragilissima</i> | 18.00 | 4.61E+01 | 5.24E+02 | 5.50E−09 | 7.57  |
| 353 | (13) | <i>Rhizosolenia fragilissima</i> | 9.00  | 4.61E+01 | 5.24E+02 | 1.90E−09 | 15.14 |
| 354 | (13) | <i>Rhizosolenia fragilissima</i> | 25.00 | 4.61E+01 | 5.24E+02 | 5.93E−09 | 22.71 |
| 355 | (13) | <i>Rhizosolenia fragilissima</i> | 18.00 | 4.61E+01 | 5.24E+02 | 5.79E−09 | 22.71 |
| 356 | (13) | <i>Rhizosolenia fragilissima</i> | 9.00  | 4.61E+01 | 5.24E+02 | 2.23E−09 | 2.52  |
| 357 | (13) | <i>Rhizosolenia fragilissima</i> | 12.00 | 4.61E+01 | 5.24E+02 | 3.17E−09 | 2.52  |
| 358 | (13) | <i>Rhizosolenia fragilissima</i> | 12.00 | 4.61E+01 | 5.24E+02 | 5.28E−09 | 22.71 |

|     |      |                                  |       |          |          |          |       |
|-----|------|----------------------------------|-------|----------|----------|----------|-------|
| 359 | (13) | <i>Rhizosolenia fragilissima</i> | 18.00 | 4.61E+01 | 5.24E+02 | 4.23E−09 | 2.52  |
| 360 | (13) | <i>Rhizosolenia fragilissima</i> | 25.00 | 4.61E+01 | 5.24E+02 | 4.81E−09 | 2.52  |
| 361 | (14) | <i>Pycnococcus provasolii</i>    | 10.00 | 3.31E+00 | 1.83E+01 | 8.32E−11 | 0.86  |
| 362 | (14) | <i>Pycnococcus provasolii</i>    | 20.00 | 3.31E+00 | 1.83E+01 | 2.40E−10 | 0.95  |
| 363 | (14) | <i>Pycnococcus provasolii</i>    | 20.00 | 3.31E+00 | 1.83E+01 | 2.99E−10 | 4.75  |
| 364 | (14) | <i>Pycnococcus provasolii</i>    | 20.00 | 3.31E+00 | 1.83E+01 | 3.47E−10 | 12.10 |
| 365 | (14) | <i>Pycnococcus provasolii</i>    | 20.00 | 3.31E+00 | 1.83E+01 | 4.17E−10 | 22.46 |
| 366 | (14) | <i>Pycnococcus provasolii</i>    | 20.00 | 3.31E+00 | 1.83E+01 | 3.15E−10 | 5.62  |
| 367 | (14) | <i>Pycnococcus provasolii</i>    | 20.00 | 3.31E+00 | 1.83E+01 | 1.62E−10 | 2.16  |
| 368 | (14) | <i>Pycnococcus provasolii</i>    | 20.00 | 3.31E+00 | 1.83E+01 | 3.81E−10 | 15.55 |
| 369 | (14) | <i>Pycnococcus provasolii</i>    | 10.00 | 3.31E+00 | 1.83E+01 | 4.40E−11 | 0.43  |
| 370 | (14) | <i>Pycnococcus provasolii</i>    | 20.00 | 3.31E+00 | 1.83E+01 | 5.78E−10 | 31.97 |
| 371 | (14) | <i>Pycnococcus provasolii</i>    | 10.00 | 3.31E+00 | 1.83E+01 | 1.15E−10 | 4.75  |
| 372 | (14) | <i>Pycnococcus provasolii</i>    | 10.00 | 3.31E+00 | 1.83E+01 | 1.04E−10 | 2.38  |
| 373 | (14) | <i>Pycnococcus provasolii</i>    | 20.00 | 3.31E+00 | 1.83E+01 | 2.13E−10 | 2.38  |
| 374 | (15) | <i>Skeletonema costatum</i>      | 15.00 | 2.11E+01 | 2.18E+02 | 6.02E−09 | 1.75  |
| 375 | (15) | <i>Skeletonema costatum</i>      | 7.00  | 2.11E+01 | 1.27E+02 | 2.20E−09 | 2.38  |
| 376 | (15) | <i>Skeletonema costatum</i>      | 10.00 | 2.11E+01 | 1.73E+02 | 4.47E−09 | 1.75  |
| 377 | (15) | <i>Skeletonema costatum</i>      | 20.00 | 2.11E+01 | 2.16E+02 | 8.64E−09 | 1.75  |
| 378 | (16) | <i>Thalassiosira rotula</i>      | 25.00 | 8.00E+02 | 1.50E+04 | 1.46E−07 | 1.69  |
| 379 | (16) | <i>Thalassiosira rotula</i>      | 25.00 | 8.00E+02 | 1.50E+04 | 1.83E−07 | 5.24  |
| 380 | (16) | <i>Thalassiosira rotula</i>      | 25.00 | 8.00E+02 | 1.50E+04 | 1.64E−07 | 3.47  |
| 381 | (16) | <i>Thalassiosira rotula</i>      | 25.00 | 8.00E+02 | 1.50E+04 | 7.19E−08 | 0.82  |
| 382 | (16) | <i>Thalassiosira rotula</i>      | 25.00 | 8.00E+02 | 1.50E+04 | 1.90E−07 | 13.86 |
| 383 | (16) | <i>Thalassiosira rotula</i>      | 25.00 | 8.00E+02 | 1.50E+04 | 2.18E−07 | 9.41  |
| 384 | (16) | <i>Thalassiosira rotula</i>      | 25.00 | 8.00E+02 | 1.50E+04 | 6.66E−08 | 1.13  |
| 385 | (16) | <i>Thalassiosira rotula</i>      | 25.00 | 8.00E+02 | 1.50E+04 | 3.20E−08 | 7.50  |
| 386 | (16) | <i>Thalassiosira rotula</i>      | 25.00 | 8.00E+02 | 1.50E+04 | 1.30E−08 | 1.15  |
| 387 | (16) | <i>Thalassiosira rotula</i>      | 25.00 | 8.00E+02 | 1.50E+04 | 2.05E−08 | 3.06  |
| 388 | (16) | <i>Thalassiosira rotula</i>      | 25.00 | 8.00E+02 | 1.50E+04 | 2.97E−08 | 5.81  |

|     |      |                                  |       |          |          |          |       |
|-----|------|----------------------------------|-------|----------|----------|----------|-------|
| 389 | (16) | <i>Thalassiosira rotula</i>      | 25.00 | 8.00E+02 | 1.50E+04 | 2.02E−08 | 1.81  |
| 390 | (16) | <i>Thalassiosira rotula</i>      | 25.00 | 8.00E+02 | 1.50E+04 | 1.36E−07 | 0.85  |
| 391 | (16) | <i>Thalassiosira rotula</i>      | 25.00 | 8.00E+02 | 1.50E+04 | 1.49E−07 | 3.47  |
| 392 | (16) | <i>Thalassiosira rotula</i>      | 25.00 | 8.00E+02 | 1.50E+04 | 3.10E−08 | 7.46  |
| 393 | (16) | <i>Thalassiosira rotula</i>      | 25.00 | 8.00E+02 | 1.50E+04 | 2.59E−08 | 11.19 |
| 394 | (16) | <i>Thalassiosira rotula</i>      | 25.00 | 8.00E+02 | 1.50E+04 | 1.12E−07 | 1.70  |
| 395 | (16) | <i>Thalassiosira rotula</i>      | 25.00 | 8.00E+02 | 1.50E+04 | 2.12E−07 | 13.82 |
| 396 | (16) | <i>Thalassiosira rotula</i>      | 25.00 | 8.00E+02 | 1.50E+04 | 1.93E−07 | 5.28  |
| 397 | (16) | <i>Thalassiosira rotula</i>      | 25.00 | 8.00E+02 | 1.50E+04 | 2.42E−08 | 3.06  |
| 398 | (16) | <i>Thalassiosira rotula</i>      | 25.00 | 8.00E+02 | 1.50E+04 | 1.57E−08 | 1.86  |
| 399 | (16) | <i>Thalassiosira rotula</i>      | 25.00 | 8.00E+02 | 1.50E+04 | 4.68E−08 | 1.18  |
| 400 | (16) | <i>Thalassiosira rotula</i>      | 25.00 | 8.00E+02 | 1.50E+04 | 1.98E−07 | 11.51 |
| 401 | (16) | <i>Thalassiosira rotula</i>      | 25.00 | 8.00E+02 | 1.50E+04 | 4.07E−09 | 1.15  |
| 402 | (16) | <i>Thalassiosira rotula</i>      | 25.00 | 8.00E+02 | 1.50E+04 | 2.98E−08 | 11.23 |
| 403 | (16) | <i>Thalassiosira rotula</i>      | 25.00 | 8.00E+02 | 1.50E+04 | 2.67E−08 | 5.81  |
| 404 | (16) | <i>Thalassiosira rotula</i>      | 25.00 | 8.00E+02 | 1.50E+04 | 5.30E−07 | 7.03  |
| 405 | (16) | <i>Thalassiosira rotula</i>      | 25.00 | 8.00E+02 | 1.50E+04 | 2.43E−07 | 9.41  |
| 406 | (16) | <i>Thalassiosira rotula</i>      | 25.00 | 8.00E+02 | 1.50E+04 | 3.51E−07 | 7.00  |
| 407 | (16) | <i>Thalassiosira rotula</i>      | 25.00 | 8.00E+02 | 1.50E+04 | 3.18E−07 | 11.31 |
| 408 | (16) | <i>Thalassiosira rotula</i>      | 25.00 | 8.00E+02 | 1.50E+04 | 2.82E−07 | 12.74 |
| 409 | (16) | <i>Thalassiosira rotula</i>      | 25.00 | 8.00E+02 | 1.50E+04 | 2.30E−07 | 11.50 |
| 410 | (16) | <i>Thalassiosira rotula</i>      | 25.00 | 8.00E+02 | 1.50E+04 | 1.65E−07 | 1.91  |
| 411 | (16) | <i>Thalassiosira rotula</i>      | 25.00 | 8.00E+02 | 1.50E+04 | 2.36E−07 | 3.50  |
| 412 | (16) | <i>Thalassiosira rotula</i>      | 25.00 | 8.00E+02 | 1.50E+04 | 4.48E−07 | 5.79  |
| 413 | (16) | <i>Thalassiosira rotula</i>      | 25.00 | 8.00E+02 | 1.50E+04 | 4.78E−07 | 11.30 |
| 414 | (16) | <i>Thalassiosira rotula</i>      | 25.00 | 8.00E+02 | 1.50E+04 | 3.52E−07 | 12.73 |
| 415 | (16) | <i>Thalassiosira rotula</i>      | 25.00 | 8.00E+02 | 1.50E+04 | 1.13E−07 | 2.01  |
| 416 | (16) | <i>Thalassiosira rotula</i>      | 25.00 | 8.00E+02 | 1.50E+04 | 2.72E−07 | 3.45  |
| 417 | (16) | <i>Thalassiosira rotula</i>      | 25.00 | 8.00E+02 | 1.50E+04 | 2.86E−07 | 5.80  |
| 418 | (17) | <i>Phaeodactylum tricornutum</i> | 15.00 | 1.01E+01 | 8.00E+01 | 1.39E−09 | 1.59  |

|     |      |                                  |       |          |          |          |       |
|-----|------|----------------------------------|-------|----------|----------|----------|-------|
| 419 | (17) | <i>Phaeodactylum tricornutum</i> | 15.00 | 1.01E+01 | 8.00E+01 | 1.50E−09 | 11.13 |
| 420 | (17) | <i>Phaeodactylum tricornutum</i> | 15.00 | 1.01E+01 | 8.00E+01 | 1.44E−09 | 11.13 |
| 421 | (17) | <i>Phaeodactylum tricornutum</i> | 15.00 | 1.01E+01 | 8.00E+01 | 8.38E−10 | 1.59  |
| 422 | (17) | <i>Phaeodactylum tricornutum</i> | 15.00 | 1.01E+01 | 8.00E+01 | 4.29E−10 | 0.80  |
| 423 | (17) | <i>Phaeodactylum tricornutum</i> | 15.00 | 1.01E+01 | 8.00E+01 | 6.34E−10 | 1.59  |
| 424 | (17) | <i>Phaeodactylum tricornutum</i> | 15.00 | 1.01E+01 | 8.00E+01 | 1.46E−09 | 11.13 |
| 425 | (17) | <i>Phaeodactylum tricornutum</i> | 15.00 | 1.01E+01 | 8.00E+01 | 8.47E−10 | 1.59  |
| 426 | (17) | <i>Phaeodactylum tricornutum</i> | 15.00 | 1.01E+01 | 8.00E+01 | 1.31E−09 | 11.13 |
| 427 | (17) | <i>Phaeodactylum tricornutum</i> | 15.00 | 1.01E+01 | 8.00E+01 | 6.91E−10 | 1.59  |
| 428 | (17) | <i>Phaeodactylum tricornutum</i> | 15.00 | 1.01E+01 | 8.00E+01 | 2.51E−10 | 0.80  |
| 429 | (17) | <i>Phaeodactylum tricornutum</i> | 15.00 | 1.01E+01 | 8.00E+01 | 3.67E−10 | 0.80  |
| 430 | (17) | <i>Phaeodactylum tricornutum</i> | 15.00 | 1.01E+01 | 8.00E+01 | 2.70E−10 | 0.80  |
| 431 | (17) | <i>Phaeodactylum tricornutum</i> | 15.00 | 1.01E+01 | 8.00E+01 | 5.79E−10 | 0.80  |
| 432 | (17) | <i>Phaeodactylum tricornutum</i> | 15.00 | 1.01E+01 | 8.00E+01 | 2.93E−10 | 0.80  |
| 433 | (17) | <i>Phaeodactylum tricornutum</i> | 15.00 | 1.01E+01 | 8.00E+01 | 8.75E−10 | 1.59  |
| 434 | (17) | <i>Phaeodactylum tricornutum</i> | 15.00 | 1.01E+01 | 8.00E+01 | 1.38E−09 | 11.13 |
| 435 | (17) | <i>Phaeodactylum tricornutum</i> | 15.00 | 1.01E+01 | 8.00E+01 | 1.55E−09 | 11.13 |
| 436 | (17) | <i>Phaeodactylum tricornutum</i> | 15.00 | 1.01E+01 | 8.00E+01 | 2.23E−10 | 0.80  |
| 437 | (17) | <i>Phaeodactylum tricornutum</i> | 15.00 | 1.01E+01 | 8.00E+01 | 1.92E−09 | 11.13 |
| 438 | (17) | <i>Phaeodactylum tricornutum</i> | 15.00 | 1.01E+01 | 8.00E+01 | 6.20E−10 | 1.59  |
| 439 | (18) | <i>Skeletonema costatum</i>      | 15.00 | 1.40E+01 | 1.19E+02 | 2.42E−09 | 3.33  |
| 440 | (18) | <i>Skeletonema costatum</i>      | 15.00 | 3.00E+01 | 1.61E+02 | 1.38E−08 | 22.68 |
| 441 | (18) | <i>Skeletonema costatum</i>      | 15.00 | 1.60E+01 | 1.19E+02 | 2.27E−09 | 2.87  |
| 442 | (18) | <i>Skeletonema costatum</i>      | 15.00 | 1.50E+01 | 1.19E+02 | 4.02E−10 | 0.76  |
| 443 | (18) | <i>Skeletonema costatum</i>      | 15.00 | 3.10E+01 | 1.19E+02 | 1.27E−08 | 9.83  |
| 444 | (18) | <i>Skeletonema costatum</i>      | 15.00 | 2.90E+01 | 1.19E+02 | 1.26E−08 | 9.58  |
| 445 | (18) | <i>Skeletonema costatum</i>      | 15.00 | 1.60E+01 | 1.24E+02 | 4.47E−09 | 5.75  |
| 446 | (18) | <i>Skeletonema costatum</i>      | 15.00 | 2.20E+01 | 1.24E+02 | 6.44E−09 | 5.54  |
| 447 | (18) | <i>Skeletonema costatum</i>      | 15.00 | 3.00E+01 | 1.61E+02 | 1.27E−08 | 22.68 |
| 448 | (18) | <i>Gonyaulax tamarensis</i>      | 15.00 | 3.08E+03 | 1.41E+04 | 7.69E−08 | 5.90  |

|     |      |                             |       |          |          |          |       |
|-----|------|-----------------------------|-------|----------|----------|----------|-------|
| 449 | (18) | <i>Gonyaulax tamarensis</i> | 15.00 | 4.04E+03 | 1.62E+04 | 2.17E-07 | 20.51 |
| 450 | (18) | <i>Gonyaulax tamarensis</i> | 15.00 | 4.04E+03 | 1.62E+04 | 1.95E-07 | 20.16 |
| 451 | (18) | <i>Gonyaulax tamarensis</i> | 15.00 | 2.54E+03 | 1.30E+04 | 4.25E-09 | 1.61  |
| 452 | (18) | <i>Gonyaulax tamarensis</i> | 15.00 | 4.19E+03 | 1.52E+04 | 1.89E-07 | 10.03 |
| 453 | (18) | <i>Gonyaulax tamarensis</i> | 15.00 | 1.96E+03 | 1.07E+04 | 1.01E-07 | 15.88 |
| 454 | (18) | <i>Skeletonema costatum</i> | 15.00 | 1.60E+01 | 6.50E+01 | 6.60E-11 | 0.25  |
| 455 | (18) | <i>Skeletonema costatum</i> | 15.00 | 3.10E+01 | 1.19E+02 | 1.39E-08 | 17.14 |
| 456 | (18) | <i>Olisthodiscus luteus</i> | 15.00 | 1.83E+02 | 9.45E+02 | 2.44E-09 | 1.61  |
| 457 | (18) | <i>Olisthodiscus luteus</i> | 15.00 | 2.99E+02 | 1.12E+03 | 2.62E-08 | 9.83  |
| 458 | (18) | <i>Olisthodiscus luteus</i> | 15.00 | 2.07E+02 | 9.05E+02 | 1.13E-08 | 5.90  |
| 459 | (18) | <i>Olisthodiscus luteus</i> | 15.00 | 1.68E+02 | 8.33E+02 | 6.93E-10 | 0.81  |
| 460 | (18) | <i>Olisthodiscus luteus</i> | 15.00 | 2.04E+02 | 1.02E+03 | 5.65E-09 | 2.92  |
| 461 | (18) | <i>Olisthodiscus luteus</i> | 15.00 | 3.14E+02 | 1.15E+03 | 2.46E-08 | 20.51 |
| 462 | (18) | <i>Gonyaulax tamarensis</i> | 15.00 | 2.78E+03 | 1.33E+04 | 2.03E-08 | 2.92  |
| 463 | (18) | <i>Olisthodiscus luteus</i> | 15.00 | 2.99E+02 | 1.12E+03 | 2.42E-08 | 9.83  |
| 464 | (18) | <i>Skeletonema costatum</i> | 5.00  | 3.10E+01 | 1.61E+02 | 3.27E-09 | 22.68 |
| 465 | (18) | <i>Skeletonema costatum</i> | 10.00 | 2.30E+01 | 1.61E+02 | 4.72E-09 | 22.68 |
| 466 | (18) | <i>Skeletonema costatum</i> | 15.00 | 2.70E+01 | 1.61E+02 | 7.54E-09 | 22.68 |
| 467 | (18) | <i>Skeletonema costatum</i> | 15.00 | 3.10E+01 | 1.61E+02 | 1.39E-08 | 22.68 |
| 468 | (18) | <i>Skeletonema costatum</i> | 15.00 | 2.50E+01 | 1.61E+02 | 1.66E-08 | 22.68 |
| 469 | (18) | <i>Skeletonema costatum</i> | 20.00 | 2.80E+01 | 1.61E+02 | 2.46E-08 | 22.68 |
| 470 | (18) | <i>Skeletonema costatum</i> | 25.00 | 2.00E+01 | 1.61E+02 | 3.20E-08 | 22.68 |
| 471 | (18) | <i>Olisthodiscus luteus</i> | 10.00 | 4.15E+02 | 1.15E+03 | 1.38E-08 | 20.51 |
| 472 | (18) | <i>Olisthodiscus luteus</i> | 15.00 | 2.31E+02 | 1.15E+03 | 1.99E-08 | 20.51 |
| 473 | (18) | <i>Olisthodiscus luteus</i> | 15.00 | 3.10E+02 | 1.15E+03 | 2.43E-08 | 20.51 |
| 474 | (18) | <i>Olisthodiscus luteus</i> | 15.00 | 2.88E+02 | 1.15E+03 | 2.60E-08 | 20.51 |
| 475 | (18) | <i>Olisthodiscus luteus</i> | 20.00 | 1.84E+02 | 1.15E+03 | 2.34E-08 | 20.51 |
| 476 | (18) | <i>Olisthodiscus luteus</i> | 25.00 | 2.00E+02 | 1.15E+03 | 3.77E-08 | 20.51 |
| 477 | (18) | <i>Gonyaulax tamarensis</i> | 5.00  | 4.85E+03 | 1.62E+04 | 7.91E-08 | 20.51 |
| 478 | (18) | <i>Gonyaulax tamarensis</i> | 10.00 | 2.87E+03 | 1.62E+04 | 9.28E-08 | 20.51 |



|     |      |                                             |       |          |          |          |       |
|-----|------|---------------------------------------------|-------|----------|----------|----------|-------|
| 479 | (18) | <i>Gonyaulax tamarensis</i>                 | 15.00 | 1.86E+03 | 1.62E+04 | 8.39E−08 | 20.51 |
| 480 | (18) | <i>Gonyaulax tamarensis</i>                 | 15.00 | 2.00E+03 | 1.62E+04 | 1.03E−07 | 20.51 |
| 481 | (18) | <i>Gonyaulax tamarensis</i>                 | 15.00 | 2.00E+03 | 1.62E+04 | 1.42E−07 | 20.51 |
| 482 | (18) | <i>Gonyaulax tamarensis</i>                 | 20.00 | 1.75E+03 | 1.62E+04 | 9.57E−08 | 20.51 |
| 483 | (19) | <i>Thalassiosira fluviatilis</i>            | 20.00 | 9.20E+01 | 1.23E+03 | 3.69E−09 | 0.52  |
| 484 | (19) | <i>Thalassiosira fluviatilis</i>            | 20.00 | 1.49E+02 | 2.22E+03 | 3.35E−08 | 9.03  |
| 485 | (19) | <i>Thalassiosira fluviatilis</i>            | 20.00 | 8.80E+01 | 1.16E+03 | 5.09E−10 | 0.19  |
| 486 | (19) | <i>Thalassiosira fluviatilis</i>            | 20.00 | 1.00E+02 | 1.36E+03 | 1.77E−09 | 0.33  |
| 487 | (19) | <i>Thalassiosira fluviatilis</i>            | 20.00 | 1.17E+02 | 1.65E+03 | 9.98E−09 | 1.32  |
| 488 | (19) | <i>Thalassiosira fluviatilis</i>            | 20.00 | 1.41E+02 | 2.08E+03 | 2.08E−08 | 3.11  |
| 489 | (20) | <i>Phaeodactylum tricorutum</i>             | 5.00  | 1.01E+01 | 8.00E+01 | 2.98E−10 | 18.58 |
| 490 | (20) | <i>Phaeodactylum tricorutum</i>             | 15.00 | 1.01E+01 | 8.00E+01 | 1.66E−09 | 18.58 |
| 491 | (20) | <i>Phaeodactylum tricorutum</i>             | 20.00 | 1.01E+01 | 8.00E+01 | 2.01E−09 | 18.58 |
| 492 | (20) | <i>Phaeodactylum tricorutum</i>             | 10.00 | 1.01E+01 | 8.00E+01 | 7.14E−10 | 18.58 |
| 493 | (21) | <i>Pseudo-nitzschia pseudodelicatissima</i> | 25.00 | 2.92E+01 | 2.98E+02 | 2.91E−08 | 3.26  |
| 494 | (21) | <i>Pseudo-nitzschia pseudodelicatissima</i> | 5.00  | 2.92E+01 | 2.98E+02 | 4.77E−10 | 3.26  |
| 495 | (21) | <i>Pseudo-nitzschia pseudodelicatissima</i> | 10.00 | 2.92E+01 | 2.98E+02 | 2.78E−09 | 3.26  |
| 496 | (21) | <i>Pseudo-nitzschia pseudodelicatissima</i> | 15.00 | 2.92E+01 | 2.98E+02 | 4.88E−09 | 3.26  |
| 497 | (21) | <i>Pseudo-nitzschia pseudodelicatissima</i> | 18.00 | 2.92E+01 | 2.98E+02 | 9.06E−09 | 3.26  |
| 498 | (21) | <i>Pseudo-nitzschia pseudodelicatissima</i> | 22.00 | 2.92E+01 | 2.98E+02 | 1.31E−08 | 3.26  |
| 499 | (22) | <i>Nitzschia americana</i>                  | 9.84  | 2.74E+02 | 4.70E+03 | 2.69E−08 | 2.59  |
| 500 | (22) | <i>Nitzschia americana</i>                  | 14.84 | 2.74E+02 | 4.70E+03 | 3.34E−08 | 2.59  |
| 501 | (22) | <i>Nitzschia americana</i>                  | 20.06 | 2.74E+02 | 4.70E+03 | 5.31E−08 | 2.59  |
| 502 | (22) | <i>Nitzschia americana</i>                  | 24.97 | 2.74E+02 | 4.70E+03 | 4.56E−08 | 2.59  |
| 503 | (23) | <i>Ditylum brightwellii</i>                 | 20.10 | 5.87E+02 | 1.21E+04 | 6.59E−08 | 2.52  |
| 504 | (23) | <i>Rhodomonas salina</i>                    | 25.20 | 2.16E+01 | 2.05E+02 | 2.05E−09 | 2.52  |
| 505 | (23) | <i>Thalassiosira eccentrica</i>             | 13.20 | 2.21E+03 | 6.19E+04 | 8.75E−08 | 2.52  |
| 506 | (23) | <i>Ditylum brightwellii</i>                 | 11.90 | 1.00E+03 | 2.32E+04 | 9.09E−08 | 2.52  |
| 507 | (23) | <i>Skeletonema costatum</i>                 | 16.20 | 1.76E+01 | 1.60E+02 | 1.85E−09 | 2.52  |
| 508 | (23) | <i>Ditylum brightwellii</i>                 | 16.20 | 5.87E+02 | 1.21E+04 | 6.08E−08 | 2.52  |

|     |      |                                  |       |          |          |          |      |
|-----|------|----------------------------------|-------|----------|----------|----------|------|
| 509 | (23) | <i>Phaeodactylum tricornutum</i> | 24.54 | 1.31E+01 | 1.11E+02 | 1.54E−09 | 2.52 |
| 510 | (23) | <i>Rhodomonas salina</i>         | 13.20 | 3.52E+01 | 3.75E+02 | 4.11E−09 | 2.52 |
| 511 | (23) | <i>Chaetoceros simplex</i>       | 16.37 | 1.97E+01 | 1.83E+02 | 1.86E−09 | 2.52 |
| 512 | (23) | <i>Chaetoceros simplex</i>       | 17.20 | 2.08E+01 | 1.96E+02 | 2.85E−09 | 6.55 |
| 513 | (23) | <i>Chaetoceros simplex</i>       | 24.97 | 1.75E+01 | 1.59E+02 | 1.83E−09 | 2.52 |
| 514 | (23) | <i>Rhodomonas salina</i>         | 9.20  | 3.29E+01 | 3.45E+02 | 2.07E−09 | 2.52 |
| 515 | (23) | <i>Isochrysis galbana</i>        | 24.32 | 7.42E+00 | 5.50E+01 | 8.14E−10 | 2.52 |
| 516 | (23) | <i>Isochrysis galbana</i>        | 15.89 | 9.02E+00 | 7.00E+01 | 9.10E−10 | 2.52 |
| 517 | (23) | <i>Phaeodactylum tricornutum</i> | 7.86  | 1.41E+01 | 1.21E+02 | 8.00E−10 | 2.52 |
| 518 | (23) | <i>Phaeodactylum tricornutum</i> | 16.60 | 1.47E+01 | 1.28E+02 | 3.43E−09 | 6.55 |
| 519 | (23) | <i>Chaetoceros simplex</i>       | 20.06 | 2.02E+01 | 1.89E+02 | 5.78E−09 | 6.55 |
| 520 | (23) | <i>Ditylum brightwellii</i>      | 13.07 | 5.87E+02 | 1.21E+04 | 4.00E−08 | 2.52 |
| 521 | (23) | <i>Coscinodiscus</i> sp.         | 20.10 | 4.71E+00 | 3.14E+01 | 9.48E−11 | 2.52 |
| 522 | (23) | <i>Rhodomonas salina</i>         | 16.00 | 3.25E+01 | 3.40E+02 | 4.92E−09 | 2.52 |
| 523 | (23) | <i>Thalassiosira weissflogii</i> | 9.04  | 1.78E+02 | 2.76E+03 | 3.51E−09 | 2.52 |
| 524 | (23) | <i>Isochrysis galbana</i>        | 19.72 | 9.02E+00 | 7.00E+01 | 9.46E−10 | 2.52 |
| 525 | (23) | <i>Cyclotella cryptica</i>       | 24.78 | 5.02E+01 | 5.81E+02 | 6.09E−09 | 2.52 |
| 526 | (23) | <i>Ditylum brightwellii</i>      | 24.78 | 4.93E+02 | 9.71E+03 | 4.99E−08 | 2.52 |
| 527 | (23) | <i>Ditylum brightwellii</i>      | 9.17  | 1.10E+03 | 2.62E+04 | 5.82E−08 | 2.52 |
| 528 | (23) | <i>Cyclotella cryptica</i>       | 9.95  | 6.63E+01 | 8.18E+02 | 3.97E−09 | 2.52 |
| 529 | (23) | <i>Cyclotella cryptica</i>       | 13.07 | 5.99E+01 | 7.22E+02 | 4.82E−09 | 2.52 |
| 530 | (23) | <i>Cyclotella cryptica</i>       | 16.59 | 5.73E+01 | 6.83E+02 | 5.31E−09 | 2.52 |
| 531 | (23) | <i>Thalassiosira eccentrica</i>  | 16.80 | 1.89E+03 | 5.10E+04 | 1.46E−07 | 2.52 |
| 532 | (23) | <i>Rhodomonas salina</i>         | 20.00 | 2.74E+01 | 2.75E+02 | 4.04E−09 | 2.52 |
| 533 | (23) | <i>Thalassiosira eccentrica</i>  | 10.40 | 2.96E+03 | 8.85E+04 | 1.36E−07 | 2.52 |
| 534 | (23) | <i>Phaeodactylum tricornutum</i> | 12.83 | 1.28E+01 | 1.08E+02 | 1.50E−09 | 2.52 |
| 535 | (23) | <i>Skeletonema costatum</i>      | 20.10 | 2.72E+01 | 2.72E+02 | 3.97E−09 | 2.52 |
| 536 | (23) | <i>Thalassiosira eccentrica</i>  | 25.20 | 1.67E+03 | 4.38E+04 | 1.30E−07 | 2.52 |
| 537 | (23) | <i>Phaeodactylum tricornutum</i> | 19.78 | 1.30E+01 | 1.10E+02 | 2.33E−09 | 2.52 |
| 538 | (23) | <i>Thalassiosira eccentrica</i>  | 20.40 | 1.88E+03 | 5.07E+04 | 1.07E−07 | 2.52 |

|     |      |                                  |       |          |          |          |       |
|-----|------|----------------------------------|-------|----------|----------|----------|-------|
| 539 | (23) | <i>Phaeodactylum tricornutum</i> | 7.83  | 1.36E+01 | 1.16E+02 | 1.02E−09 | 6.55  |
| 540 | (23) | <i>Cyclotella cryptica</i>       | 20.10 | 5.99E+01 | 7.22E+02 | 5.98E−09 | 2.52  |
| 541 | (23) | <i>Phaeodactylum tricornutum</i> | 15.51 | 1.31E+01 | 1.11E+02 | 2.10E−09 | 2.52  |
| 542 | (23) | <i>Phaeodactylum tricornutum</i> | 24.33 | 1.25E+01 | 1.05E+02 | 3.92E−09 | 6.55  |
| 543 | (23) | <i>Phaeodactylum tricornutum</i> | 19.65 | 1.33E+01 | 1.13E+02 | 4.17E−09 | 6.55  |
| 544 | (23) | <i>Phaeodactylum tricornutum</i> | 12.81 | 1.39E+01 | 1.19E+02 | 1.85E−09 | 6.55  |
| 545 | (23) | <i>Phaeodactylum tricornutum</i> | 9.01  | 1.69E+01 | 1.52E+02 | 1.16E−09 | 2.52  |
| 546 | (23) | <i>Skeletonema costatum</i>      | 13.07 | 2.50E+01 | 2.46E+02 | 2.68E−09 | 2.52  |
| 547 | (23) | <i>Skeletonema costatum</i>      | 9.17  | 1.90E+01 | 1.75E+02 | 1.11E−09 | 2.52  |
| 548 | (23) | <i>Thalassiosira weissflogii</i> | 19.49 | 1.33E+02 | 1.94E+03 | 9.47E−09 | 2.52  |
| 549 | (23) | <i>Chaetoceros simplex</i>       | 19.88 | 1.46E+01 | 1.27E+02 | 1.38E−09 | 2.52  |
| 550 | (23) | <i>Isochrysis galbana</i>        | 12.98 | 1.47E+01 | 1.28E+02 | 1.32E−09 | 2.52  |
| 551 | (23) | <i>Chaetoceros simplex</i>       | 13.17 | 1.82E+01 | 1.66E+02 | 8.07E−10 | 2.52  |
| 552 | (23) | <i>Skeletonema costatum</i>      | 24.78 | 1.76E+01 | 1.60E+02 | 2.24E−09 | 2.52  |
| 553 | (23) | <i>Chaetoceros simplex</i>       | 25.27 | 1.72E+01 | 1.55E+02 | 9.65E−09 | 6.55  |
| 554 | (23) | <i>Thalassiosira weissflogii</i> | 15.85 | 1.14E+02 | 1.60E+03 | 8.93E−09 | 2.52  |
| 555 | (23) | <i>Thalassiosira weissflogii</i> | 12.63 | 1.29E+02 | 1.86E+03 | 1.07E−08 | 2.52  |
| 556 | (23) | <i>Coscinodiscus</i> sp.         | 24.78 | 6.22E+00 | 4.43E+01 | 1.48E−10 | 2.52  |
| 557 | (23) | <i>Coscinodiscus</i> sp.         | 16.59 | 2.49E+00 | 1.43E+01 | 1.01E−10 | 2.52  |
| 558 | (23) | <i>Coscinodiscus</i> sp.         | 13.07 | 3.36E+00 | 2.07E+01 | 1.14E−10 | 2.52  |
| 559 | (23) | <i>Coscinodiscus</i> sp.         | 9.95  | 2.18E+00 | 1.21E+01 | 3.29E−11 | 2.52  |
| 560 | (23) | <i>Thalassiosira weissflogii</i> | 24.83 | 1.18E+02 | 1.68E+03 | 5.83E−09 | 2.52  |
| 561 | (24) | <i>Prochlorococcus</i>           | 24.00 | 2.85E−02 | 1.55E−01 | 3.54E−12 | 14.56 |
| 562 | (24) | <i>Prochlorococcus</i>           | 24.00 | 2.85E−02 | 1.55E−01 | 7.17E−13 | 0.14  |
| 563 | (24) | <i>Prochlorococcus</i>           | 24.00 | 2.85E−02 | 1.55E−01 | 3.16E−12 | 7.56  |
| 564 | (24) | <i>Prochlorococcus</i>           | 24.00 | 2.85E−02 | 1.55E−01 | 3.46E−12 | 8.38  |
| 565 | (24) | <i>Prochlorococcus</i>           | 24.00 | 2.85E−02 | 1.55E−01 | 1.70E−12 | 22.80 |
| 566 | (24) | <i>Prochlorococcus</i>           | 24.00 | 2.85E−02 | 1.55E−01 | 7.31E−13 | 0.50  |
| 567 | (24) | <i>Prochlorococcus</i>           | 24.00 | 2.85E−02 | 1.55E−01 | 3.16E−12 | 7.56  |
| 568 | (24) | <i>Prochlorococcus</i>           | 24.00 | 2.85E−02 | 1.55E−01 | 1.51E−12 | 2.55  |

|     |      |                 |       |          |          |          |       |
|-----|------|-----------------|-------|----------|----------|----------|-------|
| 569 | (24) | Prochlorococcus | 24.00 | 2.85E-02 | 1.55E-01 | 2.81E-12 | 3.30  |
| 570 | (24) | Prochlorococcus | 24.00 | 2.85E-02 | 1.55E-01 | 3.52E-12 | 9.30  |
| 571 | (24) | Prochlorococcus | 24.00 | 2.85E-02 | 1.55E-01 | 3.46E-12 | 11.84 |
| 572 | (24) | Prochlorococcus | 24.00 | 2.85E-02 | 1.55E-01 | 3.46E-12 | 8.38  |
| 573 | (24) | Prochlorococcus | 24.00 | 2.85E-02 | 1.55E-01 | 3.38E-12 | 8.10  |
| 574 | (24) | Prochlorococcus | 24.00 | 2.85E-02 | 1.55E-01 | 2.79E-12 | 20.55 |
| 575 | (24) | Prochlorococcus | 24.00 | 2.85E-02 | 1.55E-01 | 1.84E-12 | 3.30  |
| 576 | (24) | Prochlorococcus | 24.00 | 2.85E-02 | 1.55E-01 | 2.27E-13 | 0.21  |
| 577 | (24) | Prochlorococcus | 24.00 | 2.85E-02 | 1.55E-01 | 2.43E-12 | 6.82  |
| 578 | (24) | Prochlorococcus | 24.00 | 2.85E-02 | 1.55E-01 | 1.71E-12 | 2.88  |
| 579 | (24) | Prochlorococcus | 24.00 | 2.85E-02 | 1.55E-01 | 3.38E-12 | 8.10  |
| 580 | (24) | Prochlorococcus | 24.00 | 2.85E-02 | 1.55E-01 | 3.54E-12 | 14.56 |
| 581 | (24) | Prochlorococcus | 24.00 | 2.85E-02 | 1.55E-01 | 1.47E-12 | 0.74  |
| 582 | (24) | Prochlorococcus | 24.00 | 2.85E-02 | 1.55E-01 | 2.79E-12 | 20.55 |
| 583 | (24) | Prochlorococcus | 24.00 | 2.85E-02 | 1.55E-01 | 2.12E-12 | 21.28 |
| 584 | (24) | Prochlorococcus | 24.00 | 2.85E-02 | 1.55E-01 | 1.84E-12 | 24.42 |
| 585 | (24) | Prochlorococcus | 24.00 | 2.85E-02 | 1.55E-01 | 3.24E-12 | 3.19  |
| 586 | (24) | Prochlorococcus | 24.00 | 2.85E-02 | 1.55E-01 | 2.58E-14 | 0.18  |
| 587 | (24) | Prochlorococcus | 24.00 | 2.85E-02 | 1.55E-01 | 2.57E-12 | 8.98  |
| 588 | (24) | Prochlorococcus | 24.00 | 2.85E-02 | 1.55E-01 | 2.69E-12 | 16.71 |
| 589 | (24) | Prochlorococcus | 24.00 | 2.85E-02 | 1.55E-01 | 3.92E-12 | 11.05 |
| 590 | (24) | Prochlorococcus | 24.00 | 2.85E-02 | 1.55E-01 | 2.22E-12 | 3.19  |
| 591 | (24) | Prochlorococcus | 24.00 | 2.85E-02 | 1.55E-01 | 8.28E-13 | 0.89  |
| 592 | (24) | Prochlorococcus | 24.00 | 2.85E-02 | 1.55E-01 | 7.48E-13 | 1.35  |
| 593 | (24) | Prochlorococcus | 24.00 | 2.85E-02 | 1.55E-01 | 2.29E-13 | 0.22  |
| 594 | (24) | Prochlorococcus | 24.00 | 2.85E-02 | 1.55E-01 | 2.64E-12 | 6.36  |
| 595 | (24) | Prochlorococcus | 24.00 | 2.85E-02 | 1.55E-01 | 1.84E-14 | 0.32  |
| 596 | (24) | Prochlorococcus | 24.00 | 2.85E-02 | 1.55E-01 | 2.43E-12 | 6.82  |
| 597 | (24) | Prochlorococcus | 24.00 | 2.85E-02 | 1.55E-01 | 3.63E-12 | 14.06 |
| 598 | (24) | Prochlorococcus | 24.00 | 2.85E-02 | 1.55E-01 | 5.78E-13 | 1.39  |

|     |      |                 |       |          |          |          |       |
|-----|------|-----------------|-------|----------|----------|----------|-------|
| 599 | (24) | Prochlorococcus | 24.00 | 2.85E-02 | 1.55E-01 | 1.79E-12 | 1.60  |
| 600 | (24) | Prochlorococcus | 24.00 | 2.85E-02 | 1.55E-01 | 1.28E-12 | 2.11  |
| 601 | (24) | Prochlorococcus | 24.00 | 2.85E-02 | 1.55E-01 | 1.71E-12 | 2.88  |
| 602 | (24) | Prochlorococcus | 24.00 | 2.85E-02 | 1.55E-01 | 1.22E-12 | 2.88  |
| 603 | (24) | Prochlorococcus | 24.00 | 2.85E-02 | 1.55E-01 | 1.73E-12 | 0.99  |
| 604 | (24) | Prochlorococcus | 24.00 | 2.85E-02 | 1.55E-01 | 1.78E-12 | 26.17 |
| 605 | (24) | Prochlorococcus | 24.00 | 2.85E-02 | 1.55E-01 | 1.88E-14 | 0.40  |
| 606 | (24) | Prochlorococcus | 24.00 | 2.85E-02 | 1.55E-01 | 1.84E-12 | 24.42 |
| 607 | (24) | Prochlorococcus | 24.00 | 2.85E-02 | 1.55E-01 | 2.03E-12 | 23.60 |
| 608 | (24) | Prochlorococcus | 24.00 | 2.85E-02 | 1.55E-01 | 2.62E-12 | 21.28 |
| 609 | (24) | Prochlorococcus | 24.00 | 2.85E-02 | 1.55E-01 | 2.03E-12 | 23.60 |
| 610 | (24) | Prochlorococcus | 24.00 | 2.85E-02 | 1.55E-01 | 3.92E-12 | 11.05 |
| 611 | (24) | Prochlorococcus | 24.00 | 2.85E-02 | 1.55E-01 | 1.70E-12 | 22.80 |
| 612 | (24) | Prochlorococcus | 24.00 | 2.85E-02 | 1.55E-01 | 7.31E-13 | 0.50  |
| 613 | (24) | Prochlorococcus | 24.00 | 2.85E-02 | 1.55E-01 | 2.69E-12 | 16.71 |
| 614 | (24) | Prochlorococcus | 24.00 | 2.85E-02 | 1.55E-01 | 2.47E-12 | 12.25 |
| 615 | (24) | Prochlorococcus | 24.00 | 2.85E-02 | 1.55E-01 | 2.57E-12 | 8.98  |
| 616 | (24) | Prochlorococcus | 24.00 | 2.85E-02 | 1.55E-01 | 1.87E-12 | 3.83  |
| 617 | (24) | Prochlorococcus | 24.00 | 2.85E-02 | 1.55E-01 | 3.85E-13 | 0.51  |
| 618 | (24) | Prochlorococcus | 24.00 | 2.85E-02 | 1.55E-01 | 4.57E-13 | 0.51  |
| 619 | (24) | Prochlorococcus | 24.00 | 2.85E-02 | 1.55E-01 | 2.12E-12 | 21.28 |
| 620 | (24) | Prochlorococcus | 24.00 | 2.85E-02 | 1.55E-01 | 2.07E-12 | 1.67  |
| 621 | (24) | Prochlorococcus | 24.00 | 2.85E-02 | 1.55E-01 | 7.48E-13 | 1.35  |
| 622 | (24) | Prochlorococcus | 24.00 | 2.85E-02 | 1.55E-01 | 5.78E-13 | 1.39  |
| 623 | (24) | Prochlorococcus | 24.00 | 2.85E-02 | 1.55E-01 | 7.79E-13 | 0.72  |
| 624 | (24) | Prochlorococcus | 24.00 | 2.85E-02 | 1.55E-01 | 8.28E-13 | 0.89  |
| 625 | (24) | Prochlorococcus | 24.00 | 2.85E-02 | 1.55E-01 | 1.84E-12 | 3.30  |
| 626 | (24) | Prochlorococcus | 24.00 | 2.85E-02 | 1.55E-01 | 1.06E-12 | 1.44  |
| 627 | (24) | Prochlorococcus | 24.00 | 2.85E-02 | 1.55E-01 | 1.22E-12 | 2.88  |
| 628 | (24) | Prochlorococcus | 24.00 | 2.85E-02 | 1.55E-01 | 1.58E-12 | 2.04  |

|     |      |                 |       |          |          |          |       |
|-----|------|-----------------|-------|----------|----------|----------|-------|
| 629 | (24) | Prochlorococcus | 24.00 | 2.85E-02 | 1.55E-01 | 3.88E-14 | 12.31 |
| 630 | (24) | Prochlorococcus | 24.00 | 2.85E-02 | 1.55E-01 | 1.28E-12 | 2.11  |
| 631 | (24) | Prochlorococcus | 24.00 | 2.85E-02 | 1.55E-01 | 1.46E-12 | 2.34  |
| 632 | (24) | Prochlorococcus | 24.00 | 2.85E-02 | 1.55E-01 | 6.54E-13 | 0.55  |
| 633 | (24) | Prochlorococcus | 24.00 | 2.85E-02 | 1.55E-01 | 2.38E-12 | 1.67  |
| 634 | (24) | Prochlorococcus | 24.00 | 2.85E-02 | 1.55E-01 | 9.14E-13 | 0.48  |
| 635 | (24) | Prochlorococcus | 24.00 | 2.85E-02 | 1.55E-01 | 2.47E-12 | 12.25 |
| 636 | (24) | Prochlorococcus | 24.00 | 2.85E-02 | 1.55E-01 | 1.65E-12 | 0.97  |
| 637 | (24) | Prochlorococcus | 24.00 | 2.85E-02 | 1.55E-01 | 2.38E-12 | 2.89  |
| 638 | (24) | Prochlorococcus | 24.00 | 2.85E-02 | 1.55E-01 | 2.62E-12 | 5.54  |
| 639 | (24) | Prochlorococcus | 24.00 | 2.85E-02 | 1.55E-01 | 1.88E-14 | 0.40  |
| 640 | (24) | Prochlorococcus | 24.00 | 2.85E-02 | 1.55E-01 | 1.63E-12 | 5.42  |
| 641 | (24) | Prochlorococcus | 24.00 | 2.85E-02 | 1.55E-01 | 2.62E-12 | 21.28 |
| 642 | (24) | Prochlorococcus | 24.00 | 2.85E-02 | 1.55E-01 | 7.79E-13 | 0.72  |
| 643 | (24) | Prochlorococcus | 24.00 | 2.85E-02 | 1.55E-01 | 9.65E-13 | 3.63  |
| 644 | (24) | Prochlorococcus | 24.00 | 2.85E-02 | 1.55E-01 | 1.84E-14 | 0.32  |
| 645 | (24) | Prochlorococcus | 24.00 | 2.85E-02 | 1.55E-01 | 3.63E-12 | 14.06 |
| 646 | (24) | Prochlorococcus | 24.00 | 2.85E-02 | 1.55E-01 | 1.73E-12 | 0.99  |
| 647 | (24) | Prochlorococcus | 24.00 | 2.85E-02 | 1.55E-01 | 1.78E-12 | 26.17 |
| 648 | (24) | Prochlorococcus | 24.00 | 2.85E-02 | 1.55E-01 | 1.49E-12 | 1.81  |
| 649 | (24) | Prochlorococcus | 24.00 | 2.85E-02 | 1.55E-01 | 1.57E-12 | 7.14  |
| 650 | (24) | Prochlorococcus | 24.00 | 2.85E-02 | 1.55E-01 | 2.29E-13 | 0.22  |
| 651 | (24) | Prochlorococcus | 24.00 | 2.85E-02 | 1.55E-01 | 4.57E-13 | 0.51  |
| 652 | (24) | Prochlorococcus | 24.00 | 2.85E-02 | 1.55E-01 | 2.22E-12 | 3.19  |
| 653 | (24) | Prochlorococcus | 24.00 | 2.85E-02 | 1.55E-01 | 6.54E-13 | 0.45  |
| 654 | (24) | Prochlorococcus | 24.00 | 2.85E-02 | 1.55E-01 | 1.55E-12 | 1.33  |
| 655 | (24) | Prochlorococcus | 24.00 | 2.85E-02 | 1.55E-01 | 2.64E-12 | 6.36  |
| 656 | (24) | Prochlorococcus | 24.00 | 2.85E-02 | 1.55E-01 | 1.58E-12 | 2.04  |
| 657 | (24) | Prochlorococcus | 24.00 | 2.85E-02 | 1.55E-01 | 2.00E-12 | 2.71  |
| 658 | (24) | Prochlorococcus | 24.00 | 2.85E-02 | 1.55E-01 | 1.45E-12 | 2.47  |

|     |      |                                  |       |          |          |          |       |
|-----|------|----------------------------------|-------|----------|----------|----------|-------|
| 659 | (24) | <i>Prochlorococcus</i>           | 24.00 | 2.85E-02 | 1.55E-01 | 3.85E-13 | 0.51  |
| 660 | (24) | <i>Prochlorococcus</i>           | 24.00 | 2.85E-02 | 1.55E-01 | 5.16E-13 | 0.21  |
| 661 | (24) | <i>Prochlorococcus</i>           | 24.00 | 2.85E-02 | 1.55E-01 | 2.15E-12 | 2.44  |
| 662 | (24) | <i>Prochlorococcus</i>           | 24.00 | 2.85E-02 | 1.55E-01 | 3.52E-12 | 9.30  |
| 663 | (24) | <i>Prochlorococcus</i>           | 24.00 | 2.85E-02 | 1.55E-01 | 1.06E-12 | 1.44  |
| 664 | (24) | <i>Prochlorococcus</i>           | 24.00 | 2.85E-02 | 1.55E-01 | 2.81E-12 | 3.30  |
| 665 | (24) | <i>Prochlorococcus</i>           | 24.00 | 2.85E-02 | 1.55E-01 | 1.46E-12 | 2.34  |
| 666 | (24) | <i>Prochlorococcus</i>           | 24.00 | 2.85E-02 | 1.55E-01 | 1.07E-12 | 10.51 |
| 667 | (24) | <i>Prochlorococcus</i>           | 24.00 | 2.85E-02 | 1.55E-01 | 3.24E-12 | 3.19  |
| 668 | (24) | <i>Prochlorococcus</i>           | 24.00 | 2.85E-02 | 1.55E-01 | 1.79E-12 | 1.60  |
| 669 | (24) | <i>Prochlorococcus</i>           | 24.00 | 2.85E-02 | 1.55E-01 | 3.88E-14 | 7.35  |
| 670 | (24) | <i>Prochlorococcus</i>           | 24.00 | 2.85E-02 | 1.55E-01 | 1.71E-12 | 1.11  |
| 671 | (25) | <i>Tetraselmis maculata</i>      | 18.00 | 7.98E+01 | 3.10E+02 | 6.34E-08 | 7.05  |
| 672 | (25) | <i>Phaeodactylum tricornutum</i> | 18.00 | 1.40E+01 | 1.20E+02 | 1.53E-09 | 7.05  |
| 673 | (25) | <i>Amphidinium carteri</i>       | 18.00 | 1.85E+02 | 7.40E+02 | 1.07E-07 | 7.05  |
| 674 | (25) | <i>Exuviella</i> sp.             | 18.00 | 1.94E+02 | 7.80E+02 | 1.35E-08 | 7.05  |
| 675 | (25) | <i>Skeletonema costatum</i>      | 18.00 | 1.02E+02 | 1.39E+03 | 2.72E-08 | 7.05  |
| 676 | (25) | <i>Chaetoceros</i> sp.           | 18.00 | 5.50E+01 | 6.50E+02 | 9.76E-09 | 7.05  |
| 677 | (25) | <i>Agmenellum quadruplicatum</i> | 18.00 | 3.70E-01 | 1.50E+00 | 7.79E-11 | 7.05  |
| 678 | (25) | <i>Coscinodiscus</i> sp.         | 18.00 | 6.66E+04 | 3.42E+06 | 4.04E-06 | 7.05  |
| 679 | (25) | <i>Dunaliella salina</i>         | 18.00 | 4.52E+01 | 4.00E+02 | 1.03E-08 | 7.05  |
| 680 | (25) | <i>Syracosphaera carterae</i>    | 18.00 | 1.61E+02 | 1.76E+03 | 2.17E-08 | 7.05  |
| 681 | (25) | <i>Monochrysis lutheri</i>       | 18.00 | 4.59E+00 | 2.80E+01 | 6.79E-10 | 7.05  |
| 682 | (26) | <i>Detonula confervacea</i>      | 0.00  | 1.89E+02 | 2.99E+03 | 6.45E-09 | 0.83  |
| 683 | (26) | <i>Detonula confervacea</i>      | 0.00  | 1.89E+02 | 2.99E+03 | 9.85E-09 | 1.63  |
| 684 | (26) | <i>Detonula confervacea</i>      | 0.00  | 1.89E+02 | 2.99E+03 | 1.86E-10 | 0.00  |
| 685 | (26) | <i>Detonula confervacea</i>      | 2.00  | 1.89E+02 | 2.99E+03 | 1.53E-08 | 4.26  |
| 686 | (26) | <i>Detonula confervacea</i>      | 2.00  | 1.89E+02 | 2.99E+03 | 1.53E-08 | 8.68  |
| 687 | (26) | <i>Detonula confervacea</i>      | 2.00  | 1.89E+02 | 2.99E+03 | 1.53E-08 | 34.40 |
| 688 | (26) | <i>Skeletonema costatum</i>      | 25.00 | 3.53E+01 | 3.76E+02 | 7.38E-09 | 8.90  |

|     |      |                              |       |          |          |          |       |
|-----|------|------------------------------|-------|----------|----------|----------|-------|
| 689 | (26) | Chaetoceros sp.              | 10.00 | 1.55E+02 | 2.33E+03 | 3.63E-09 | 17.28 |
| 690 | (26) | Detonula confervacea         | 2.00  | 1.89E+02 | 2.99E+03 | 8.49E-09 | 1.88  |
| 691 | (26) | Thalassiosira nordenskioldii | 0.00  | 3.00E+02 | 5.27E+03 | 1.99E-08 | 17.50 |
| 692 | (26) | Chaetoceros sp.              | 5.00  | 1.55E+02 | 2.33E+03 | 1.30E-08 | 8.77  |
| 693 | (26) | Detonula confervacea         | 0.00  | 1.89E+02 | 2.99E+03 | 1.25E-08 | 4.24  |
| 694 | (26) | Thalassiosira nordenskioldii | 0.00  | 3.00E+02 | 5.27E+03 | 1.34E-08 | 1.38  |
| 695 | (26) | Thalassiosira nordenskioldii | 10.00 | 3.00E+02 | 5.27E+03 | 4.33E-08 | 8.86  |
| 696 | (26) | Thalassiosira nordenskioldii | 0.00  | 3.00E+02 | 5.27E+03 | 1.68E-08 | 4.30  |
| 697 | (26) | Detonula confervacea         | 0.00  | 1.89E+02 | 2.99E+03 | 1.45E-08 | 17.51 |
| 698 | (26) | Detonula confervacea         | 0.00  | 1.89E+02 | 2.99E+03 | 1.31E-08 | 34.39 |
| 699 | (26) | Detonula confervacea         | 10.00 | 1.89E+02 | 2.99E+03 | 7.56E-10 | 0.27  |
| 700 | (26) | Thalassiosira nordenskioldii | 10.00 | 3.00E+02 | 5.27E+03 | 4.24E-08 | 17.56 |
| 701 | (26) | Detonula confervacea         | 5.00  | 1.89E+02 | 2.99E+03 | 2.32E-08 | 17.29 |
| 702 | (26) | Skeletonema costatum         | 5.00  | 3.53E+01 | 3.76E+02 | 7.32E-10 | 17.28 |
| 703 | (26) | Chaetoceros sp.              | 5.00  | 1.55E+02 | 2.33E+03 | 1.30E-08 | 17.28 |
| 704 | (26) | Chaetoceros sp.              | 2.00  | 1.55E+02 | 2.33E+03 | 8.95E-09 | 8.77  |
| 705 | (26) | Detonula confervacea         | 0.00  | 1.89E+02 | 2.99E+03 | 1.27E-08 | 8.66  |
| 706 | (26) | Thalassiosira nordenskioldii | 5.00  | 3.00E+02 | 5.27E+03 | 2.93E-08 | 17.53 |
| 707 | (26) | Thalassiosira nordenskioldii | 5.00  | 3.00E+02 | 5.27E+03 | 3.06E-08 | 8.56  |
| 708 | (26) | Detonula confervacea         | 5.00  | 1.89E+02 | 2.99E+03 | 2.30E-08 | 34.44 |
| 709 | (26) | Detonula confervacea         | 5.00  | 1.89E+02 | 2.99E+03 | 4.08E-09 | 1.59  |
| 710 | (26) | Detonula confervacea         | 5.00  | 1.89E+02 | 2.99E+03 | 5.61E-10 | 0.79  |
| 711 | (26) | Detonula confervacea         | 5.00  | 1.89E+02 | 2.99E+03 | 1.25E-08 | 4.50  |
| 712 | (26) | Skeletonema costatum         | 15.00 | 3.53E+01 | 3.76E+02 | 3.63E-09 | 25.92 |
| 713 | (26) | Detonula confervacea         | 10.00 | 1.89E+02 | 2.99E+03 | 2.73E-08 | 34.45 |
| 714 | (26) | Detonula confervacea         | 5.00  | 1.89E+02 | 2.99E+03 | 2.29E-08 | 8.71  |
| 715 | (26) | Skeletonema costatum         | 5.00  | 3.53E+01 | 3.76E+02 | 7.62E-10 | 8.90  |
| 716 | (26) | Detonula confervacea         | 10.00 | 1.89E+02 | 2.99E+03 | 1.53E-09 | 1.83  |
| 717 | (26) | Detonula confervacea         | 10.00 | 1.89E+02 | 2.99E+03 | 1.01E-08 | 4.23  |
| 718 | (26) | Chaetoceros sp.              | 2.00  | 1.55E+02 | 2.33E+03 | 8.05E-09 | 4.38  |



|     |      |                                     |       |          |          |          |       |
|-----|------|-------------------------------------|-------|----------|----------|----------|-------|
| 719 | (26) | <i>Skeletonema costatum</i>         | 10.00 | 3.53E+01 | 3.76E+02 | 3.46E−09 | 8.90  |
| 720 | (26) | <i>Skeletonema costatum</i>         | 15.00 | 3.53E+01 | 3.76E+02 | 4.79E−09 | 4.71  |
| 721 | (26) | <i>Thalassiosira nordenskioldii</i> | 0.00  | 3.00E+02 | 5.27E+03 | 2.94E−10 | 0.00  |
| 722 | (26) | <i>Skeletonema costatum</i>         | 10.00 | 3.53E+01 | 3.76E+02 | 3.10E−09 | 4.71  |
| 723 | (26) | <i>Skeletonema costatum</i>         | 15.00 | 3.53E+01 | 3.76E+02 | 4.69E−09 | 8.64  |
| 724 | (26) | <i>Asterionella formosa</i>         | 30.00 | 1.73E+01 | 1.56E+02 | 4.86E−09 | 17.34 |
| 725 | (26) | <i>Thalassiosira nordenskioldii</i> | 0.00  | 3.00E+02 | 5.27E+03 | 1.78E−08 | 34.64 |
| 726 | (26) | <i>Skeletonema costatum</i>         | 15.00 | 3.53E+01 | 3.76E+02 | 4.55E−09 | 17.28 |
| 727 | (26) | <i>Skeletonema costatum</i>         | 20.00 | 3.53E+01 | 3.76E+02 | 7.49E−09 | 8.64  |
| 728 | (26) | <i>Asterionella formosa</i>         | 25.00 | 1.73E+01 | 1.56E+02 | 3.90E−09 | 8.72  |
| 729 | (26) | <i>Skeletonema costatum</i>         | 10.00 | 3.53E+01 | 3.76E+02 | 3.28E−09 | 17.54 |
| 730 | (26) | <i>Skeletonema costatum</i>         | 30.00 | 3.53E+01 | 3.76E+02 | 4.95E−09 | 17.28 |
| 731 | (26) | <i>Detonula confervacea</i>         | 2.00  | 1.89E+02 | 2.99E+03 | 1.86E−08 | 17.27 |
| 732 | (26) | <i>Thalassiosira nordenskioldii</i> | 15.00 | 3.00E+02 | 5.27E+03 | 4.69E−08 | 8.60  |
| 733 | (26) | <i>Skeletonema costatum</i>         | 5.00  | 3.53E+01 | 3.76E+02 | 8.20E−10 | 4.45  |
| 734 | (26) | <i>Thalassiosira nordenskioldii</i> | 15.00 | 3.00E+02 | 5.27E+03 | 5.04E−08 | 17.58 |
| 735 | (26) | <i>Detonula confervacea</i>         | 10.00 | 1.89E+02 | 2.99E+03 | 2.88E−08 | 17.31 |
| 736 | (26) | <i>Asterionella formosa</i>         | 15.00 | 1.73E+01 | 1.56E+02 | 2.28E−09 | 8.60  |
| 737 | (26) | <i>Detonula confervacea</i>         | 2.00  | 1.89E+02 | 2.99E+03 | 1.86E−10 | 0.00  |
| 738 | (26) | <i>Thalassiosira nordenskioldii</i> | 0.00  | 3.00E+02 | 5.27E+03 | 2.25E−08 | 8.54  |
| 739 | (26) | <i>Asterionella formosa</i>         | 5.00  | 1.73E+01 | 1.56E+02 | 1.34E−09 | 17.34 |
| 740 | (26) | <i>Asterionella formosa</i>         | 10.00 | 1.73E+01 | 1.56E+02 | 1.68E−09 | 17.38 |
| 741 | (26) | <i>Thalassiosira nordenskioldii</i> | 0.00  | 3.00E+02 | 5.27E+03 | 7.88E−09 | 0.57  |
| 742 | (26) | <i>Asterionella formosa</i>         | 10.00 | 1.73E+01 | 1.56E+02 | 1.62E−09 | 9.06  |
| 743 | (26) | <i>Asterionella formosa</i>         | 15.00 | 1.73E+01 | 1.56E+02 | 2.59E−09 | 17.46 |
| 744 | (26) | <i>Asterionella formosa</i>         | 25.00 | 1.73E+01 | 1.56E+02 | 3.84E−09 | 17.55 |
| 745 | (26) | <i>Skeletonema costatum</i>         | 25.00 | 3.53E+01 | 3.76E+02 | 1.13E−08 | 17.54 |
| 746 | (26) | <i>Skeletonema costatum</i>         | 25.00 | 3.53E+01 | 3.76E+02 | 9.47E−09 | 25.92 |
| 747 | (26) | <i>Skeletonema costatum</i>         | 20.00 | 3.53E+01 | 3.76E+02 | 8.27E−09 | 17.54 |
| 748 | (26) | <i>Skeletonema costatum</i>         | 30.00 | 3.53E+01 | 3.76E+02 | 5.25E−09 | 8.90  |

|     |      |                                  |       |          |          |          |       |
|-----|------|----------------------------------|-------|----------|----------|----------|-------|
| 749 | (26) | <i>Skeletonema costatum</i>      | 20.00 | 3.53E+01 | 3.76E+02 | 7.33E−09 | 26.44 |
| 750 | (26) | <i>Skeletonema costatum</i>      | 30.00 | 3.53E+01 | 3.76E+02 | 4.96E−09 | 26.18 |
| 751 | (26) | <i>Asterionella formosa</i>      | 5.00  | 1.73E+01 | 1.56E+02 | 1.59E−09 | 8.79  |
| 752 | (26) | <i>Asterionella formosa</i>      | 30.00 | 1.73E+01 | 1.56E+02 | 4.12E−09 | 8.73  |
| 753 | (26) | <i>Detonula confervacea</i>      | 10.00 | 1.89E+02 | 2.99E+03 | 2.67E−08 | 8.47  |
| 754 | (26) | <i>Chaetoceros</i> sp.           | 10.00 | 1.55E+02 | 2.33E+03 | 6.48E−09 | 8.77  |
| 755 | (27) | <i>Isochrysis galbana</i>        | 10.00 | 9.86E+00 | 5.84E+01 | 7.46E−10 | 19.01 |
| 756 | (27) | <i>Chaetoceros gracilis</i>      | 19.85 | 9.74E+00 | 7.69E+01 | 6.47E−09 | 19.01 |
| 757 | (27) | <i>Isochrysis galbana</i>        | 10.00 | 9.86E+00 | 5.84E+01 | 8.30E−10 | 19.01 |
| 758 | (27) | <i>Chaetoceros simplex</i>       | 25.13 | 6.83E+00 | 4.97E+01 | 3.79E−09 | 19.01 |
| 759 | (27) | <i>Dunaliella tertiolecta</i>    | 20.02 | 3.53E+01 | 2.27E+02 | 7.22E−09 | 19.01 |
| 760 | (27) | <i>Chaetoceros simplex</i>       | 25.01 | 6.83E+00 | 4.97E+01 | 1.97E−09 | 19.01 |
| 761 | (27) | <i>Chaetoceros simplex</i>       | 25.23 | 6.83E+00 | 4.97E+01 | 1.29E−09 | 19.01 |
| 762 | (27) | <i>Chaetoceros gracilis</i>      | 14.89 | 7.88E+00 | 5.93E+01 | 9.05E−10 | 19.01 |
| 763 | (27) | <i>Isochrysis galbana</i>        | 24.72 | 9.90E+00 | 5.87E+01 | 5.92E−09 | 19.01 |
| 764 | (27) | <i>Chaetoceros gracilis</i>      | 19.77 | 9.74E+00 | 7.69E+01 | 2.90E−09 | 19.01 |
| 765 | (27) | <i>Chaetoceros gracilis</i>      | 14.91 | 7.88E+00 | 5.93E+01 | 1.08E−09 | 19.01 |
| 766 | (27) | <i>Chaetoceros gracilis</i>      | 14.95 | 7.88E+00 | 5.93E+01 | 1.90E−09 | 19.01 |
| 767 | (27) | <i>Thalassiosira pseudonana</i>  | 14.95 | 9.76E+00 | 7.71E+01 | 2.49E−09 | 19.01 |
| 768 | (27) | <i>Thalassiosira pseudonana</i>  | 19.77 | 1.12E+01 | 9.13E+01 | 3.24E−09 | 19.01 |
| 769 | (27) | <i>Thalassiosira pseudonana</i>  | 24.62 | 1.67E+01 | 1.50E+02 | 7.62E−09 | 19.01 |
| 770 | (27) | <i>Thalassiosira pseudonana</i>  | 19.81 | 1.12E+01 | 9.13E+01 | 5.34E−09 | 19.01 |
| 771 | (27) | <i>Thalassiosira pseudonana</i>  | 19.76 | 1.12E+01 | 9.13E+01 | 2.97E−09 | 19.01 |
| 772 | (27) | <i>Pavlova lutheri</i>           | 25.11 | 1.66E+01 | 1.02E+02 | 1.22E−08 | 19.01 |
| 773 | (27) | <i>Chaetoceros calcitrans</i>    | 20.00 | 7.02E+00 | 5.13E+01 | 4.77E−09 | 19.01 |
| 774 | (27) | <i>Thalassiosira pseudonana</i>  | 14.92 | 9.76E+00 | 7.71E+01 | 1.69E−09 | 19.01 |
| 775 | (27) | <i>Chaetoceros simplex</i>       | 10.08 | 4.92E+00 | 3.31E+01 | 2.52E−10 | 19.01 |
| 776 | (27) | <i>Thalassiosira pseudonana</i>  | 17.28 | 9.76E+00 | 7.71E+01 | 5.46E−09 | 19.01 |
| 777 | (27) | <i>Chaetoceros calcitrans</i>    | 25.00 | 7.77E+00 | 5.82E+01 | 1.38E−08 | 19.01 |
| 778 | (27) | <i>Phaeodactylum tricornutum</i> | 17.57 | 1.11E+01 | 9.04E+01 | 2.40E−09 | 19.01 |

|     |      |                                  |       |          |          |          |       |
|-----|------|----------------------------------|-------|----------|----------|----------|-------|
| 779 | (27) | <i>Dunaliella tertiolecta</i>    | 9.77  | 4.31E+01 | 2.81E+02 | 1.51E−09 | 19.01 |
| 780 | (27) | <i>Chaetoceros simplex</i>       | 25.11 | 6.83E+00 | 4.97E+01 | 3.51E−09 | 19.01 |
| 781 | (27) | <i>Chaetoceros simplex</i>       | 20.20 | 7.70E+00 | 5.76E+01 | 2.23E−09 | 19.01 |
| 782 | (27) | <i>Phaeodactylum tricornutum</i> | 10.11 | 1.33E+01 | 1.13E+02 | 1.12E−09 | 19.01 |
| 783 | (27) | <i>Phaeodactylum tricornutum</i> | 25.01 | 1.53E+01 | 1.35E+02 | 6.02E−09 | 19.01 |
| 784 | (27) | <i>Chaetoceros simplex</i>       | 19.96 | 7.70E+00 | 5.76E+01 | 2.89E−09 | 19.01 |
| 785 | (27) | <i>Chaetoceros calcitrans</i>    | 10.00 | 6.62E+00 | 4.78E+01 | 6.43E−10 | 19.01 |
| 786 | (27) | <i>Chaetoceros simplex</i>       | 17.71 | 7.70E+00 | 5.76E+01 | 3.02E−09 | 19.01 |
| 787 | (27) | <i>Chaetoceros gracilis</i>      | 24.69 | 8.19E+00 | 6.21E+01 | 7.23E−09 | 19.01 |
| 788 | (27) | <i>Chaetoceros simplex</i>       | 20.02 | 7.70E+00 | 5.76E+01 | 3.98E−09 | 19.01 |
| 789 | (27) | <i>Chaetoceros simplex</i>       | 25.14 | 6.83E+00 | 4.97E+01 | 4.09E−09 | 19.01 |
| 790 | (27) | <i>Thalassiosira pseudonana</i>  | 24.89 | 1.67E+01 | 1.50E+02 | 6.75E−09 | 19.01 |
| 791 | (27) | <i>Isochrysis galbana</i>        | 20.00 | 1.11E+01 | 6.63E+01 | 1.48E−09 | 19.01 |
| 792 | (27) | <i>Phaeodactylum tricornutum</i> | 17.58 | 1.11E+01 | 9.04E+01 | 2.74E−09 | 19.01 |
| 793 | (27) | <i>Chaetoceros gracilis</i>      | 24.71 | 8.19E+00 | 6.21E+01 | 8.65E−09 | 19.01 |
| 794 | (27) | <i>Chaetoceros calcitrans</i>    | 25.00 | 7.77E+00 | 5.82E+01 | 1.65E−08 | 19.01 |
| 795 | (27) | <i>Chaetoceros simplex</i>       | 10.17 | 4.92E+00 | 3.31E+01 | 5.80E−10 | 19.01 |
| 796 | (27) | <i>Chaetoceros simplex</i>       | 15.03 | 8.90E+00 | 6.89E+01 | 1.62E−09 | 19.01 |
| 797 | (27) | <i>Chaetoceros simplex</i>       | 15.06 | 8.90E+00 | 6.89E+01 | 1.88E−09 | 19.01 |
| 798 | (27) | <i>Chaetoceros simplex</i>       | 10.10 | 4.92E+00 | 3.31E+01 | 3.03E−10 | 19.01 |
| 799 | (27) | <i>Chaetoceros gracilis</i>      | 10.07 | 1.05E+01 | 8.47E+01 | 1.02E−09 | 19.01 |
| 800 | (27) | <i>Pavlova lutheri</i>           | 19.96 | 1.15E+01 | 6.90E+01 | 5.87E−09 | 19.01 |
| 801 | (27) | <i>Chaetoceros calcitrans</i>    | 20.00 | 7.02E+00 | 5.13E+01 | 3.64E−09 | 19.01 |
| 802 | (27) | <i>Chaetoceros calcitrans</i>    | 15.00 | 7.03E+00 | 5.15E+01 | 1.28E−09 | 19.01 |
| 803 | (27) | <i>Chaetoceros calcitrans</i>    | 25.00 | 7.77E+00 | 5.82E+01 | 2.32E−08 | 19.01 |
| 804 | (27) | <i>Dunaliella tertiolecta</i>    | 25.05 | 5.20E+01 | 3.43E+02 | 2.55E−08 | 19.01 |
| 805 | (27) | <i>Dunaliella tertiolecta</i>    | 25.04 | 5.20E+01 | 3.43E+02 | 2.48E−08 | 19.01 |
| 806 | (27) | <i>Thalassiosira pseudonana</i>  | 14.91 | 9.76E+00 | 7.71E+01 | 1.52E−09 | 19.01 |
| 807 | (27) | <i>Pavlova lutheri</i>           | 10.11 | 1.06E+01 | 6.32E+01 | 9.33E−10 | 19.01 |
| 808 | (27) | <i>Thalassiosira pseudonana</i>  | 9.78  | 1.16E+01 | 9.50E+01 | 9.08E−10 | 19.01 |

|     |      |                                  |       |          |          |          |       |
|-----|------|----------------------------------|-------|----------|----------|----------|-------|
| 809 | (27) | <i>Chaetoceros calcitrans</i>    | 17.50 | 7.03E+00 | 5.15E+01 | 4.63E−09 | 19.01 |
| 810 | (27) | <i>Pavlova lutheri</i>           | 15.23 | 1.02E+01 | 6.05E+01 | 1.12E−09 | 19.01 |
| 811 | (27) | <i>Isochrysis galbana</i>        | 24.72 | 9.90E+00 | 5.87E+01 | 6.41E−09 | 19.01 |
| 812 | (27) | <i>Dunaliella tertiolecta</i>    | 25.06 | 5.20E+01 | 3.43E+02 | 2.86E−08 | 19.01 |
| 813 | (27) | <i>Chaetoceros calcitrans</i>    | 10.00 | 6.62E+00 | 4.78E+01 | 1.04E−09 | 19.01 |
| 814 | (27) | <i>Pavlova lutheri</i>           | 10.10 | 1.06E+01 | 6.32E+01 | 8.41E−10 | 19.01 |
| 815 | (27) | <i>Pavlova lutheri</i>           | 10.10 | 1.06E+01 | 6.32E+01 | 7.53E−10 | 19.01 |
| 816 | (27) | <i>Dunaliella tertiolecta</i>    | 15.02 | 4.86E+01 | 3.20E+02 | 4.33E−09 | 19.01 |
| 817 | (27) | <i>Dunaliella tertiolecta</i>    | 9.74  | 4.31E+01 | 2.81E+02 | 7.19E−10 | 19.01 |
| 818 | (27) | <i>Dunaliella tertiolecta</i>    | 25.06 | 5.20E+01 | 3.43E+02 | 2.78E−08 | 19.01 |
| 819 | (27) | <i>Dunaliella tertiolecta</i>    | 15.03 | 4.86E+01 | 3.20E+02 | 4.78E−09 | 19.01 |
| 820 | (27) | <i>Chaetoceros calcitrans</i>    | 25.00 | 7.77E+00 | 5.82E+01 | 1.76E−08 | 19.01 |
| 821 | (27) | <i>Phaeodactylum tricornutum</i> | 25.30 | 1.53E+01 | 1.35E+02 | 6.38E−09 | 19.01 |
| 822 | (27) | <i>Dunaliella tertiolecta</i>    | 9.73  | 4.31E+01 | 2.81E+02 | 5.98E−10 | 19.01 |
| 823 | (27) | <i>Isochrysis galbana</i>        | 17.50 | 1.11E+01 | 6.63E+01 | 6.23E−10 | 19.01 |
| 824 | (27) | <i>Dunaliella tertiolecta</i>    | 20.02 | 3.53E+01 | 2.27E+02 | 7.74E−09 | 19.01 |
| 825 | (27) | <i>Dunaliella tertiolecta</i>    | 20.04 | 3.53E+01 | 2.27E+02 | 8.57E−09 | 19.01 |
| 826 | (27) | <i>Chaetoceros calcitrans</i>    | 20.00 | 7.02E+00 | 5.13E+01 | 3.36E−09 | 19.01 |
| 827 | (27) | <i>Chaetoceros calcitrans</i>    | 20.00 | 7.02E+00 | 5.13E+01 | 2.52E−09 | 19.01 |
| 828 | (27) | <i>Dunaliella tertiolecta</i>    | 17.48 | 4.86E+01 | 3.20E+02 | 1.58E−08 | 19.01 |
| 829 | (27) | <i>Dunaliella tertiolecta</i>    | 15.05 | 4.86E+01 | 3.20E+02 | 5.74E−09 | 19.01 |
| 830 | (27) | <i>Pavlova lutheri</i>           | 20.19 | 1.15E+01 | 6.90E+01 | 4.41E−09 | 19.01 |
| 831 | (27) | <i>Dunaliella tertiolecta</i>    | 25.27 | 5.20E+01 | 3.43E+02 | 1.69E−08 | 19.01 |
| 832 | (27) | <i>Pavlova lutheri</i>           | 24.82 | 1.66E+01 | 1.02E+02 | 1.16E−08 | 19.01 |
| 833 | (27) | <i>Pavlova lutheri</i>           | 25.00 | 1.66E+01 | 1.02E+02 | 6.30E−09 | 19.01 |
| 834 | (27) | <i>Pavlova lutheri</i>           | 24.87 | 1.66E+01 | 1.02E+02 | 1.63E−08 | 19.01 |
| 835 | (27) | <i>Chaetoceros calcitrans</i>    | 10.00 | 6.62E+00 | 4.78E+01 | 1.04E−09 | 19.01 |
| 836 | (27) | <i>Phaeodactylum tricornutum</i> | 25.29 | 1.53E+01 | 1.35E+02 | 6.02E−09 | 19.01 |
| 837 | (27) | <i>Chaetoceros calcitrans</i>    | 15.00 | 7.03E+00 | 5.15E+01 | 1.41E−09 | 19.01 |
| 838 | (27) | <i>Phaeodactylum tricornutum</i> | 17.59 | 1.08E+01 | 8.72E+01 | 2.84E−09 | 19.01 |

|     |      |                                  |       |          |          |          |       |
|-----|------|----------------------------------|-------|----------|----------|----------|-------|
| 839 | (27) | <i>Pavlova lutheri</i>           | 19.94 | 1.15E+01 | 6.90E+01 | 5.40E−09 | 19.01 |
| 840 | (27) | <i>Isochrysis galbana</i>        | 15.00 | 6.69E+00 | 3.87E+01 | 2.00E−09 | 19.01 |
| 841 | (27) | <i>Isochrysis galbana</i>        | 20.00 | 1.11E+01 | 6.63E+01 | 8.87E−10 | 19.01 |
| 842 | (27) | <i>Isochrysis galbana</i>        | 10.00 | 9.86E+00 | 5.84E+01 | 8.73E−10 | 19.01 |
| 843 | (27) | <i>Isochrysis galbana</i>        | 15.00 | 6.69E+00 | 3.87E+01 | 1.54E−10 | 19.01 |
| 844 | (27) | <i>Isochrysis galbana</i>        | 24.72 | 9.90E+00 | 5.87E+01 | 6.08E−09 | 19.01 |
| 845 | (27) | <i>Isochrysis galbana</i>        | 10.00 | 9.86E+00 | 5.84E+01 | 7.06E−10 | 19.01 |
| 846 | (27) | <i>Isochrysis galbana</i>        | 20.00 | 1.11E+01 | 6.63E+01 | 9.84E−10 | 19.01 |
| 847 | (27) | <i>Isochrysis galbana</i>        | 24.72 | 9.90E+00 | 5.87E+01 | 3.05E−09 | 19.01 |
| 848 | (27) | <i>Pavlova lutheri</i>           | 15.01 | 1.02E+01 | 6.05E+01 | 2.02E−09 | 19.01 |
| 849 | (27) | <i>Pavlova lutheri</i>           | 14.95 | 1.02E+01 | 6.05E+01 | 1.17E−09 | 19.01 |
| 850 | (27) | <i>Chaetoceros calcitrans</i>    | 15.00 | 7.03E+00 | 5.15E+01 | 4.00E−09 | 19.01 |
| 851 | (27) | <i>Isochrysis galbana</i>        | 20.00 | 1.11E+01 | 6.63E+01 | 1.14E−09 | 19.01 |
| 852 | (27) | <i>Chaetoceros calcitrans</i>    | 10.00 | 6.62E+00 | 4.78E+01 | 4.79E−10 | 19.01 |
| 853 | (27) | <i>Phaeodactylum tricornutum</i> | 20.18 | 1.11E+01 | 9.04E+01 | 3.99E−09 | 19.01 |
| 854 | (27) | <i>Thalassiosira pseudonana</i>  | 24.70 | 1.67E+01 | 1.50E+02 | 1.68E−08 | 19.01 |
| 855 | (27) | <i>Chaetoceros simplex</i>       | 15.07 | 8.90E+00 | 6.89E+01 | 2.07E−09 | 19.01 |
| 856 | (27) | <i>Thalassiosira pseudonana</i>  | 19.82 | 1.12E+01 | 9.13E+01 | 5.78E−09 | 19.01 |
| 857 | (27) | <i>Phaeodactylum tricornutum</i> | 20.17 | 1.11E+01 | 9.04E+01 | 3.53E−09 | 19.01 |
| 858 | (27) | <i>Chaetoceros simplex</i>       | 20.00 | 7.70E+00 | 5.76E+01 | 3.54E−09 | 19.01 |
| 859 | (27) | <i>Pavlova lutheri</i>           | 17.46 | 1.02E+01 | 6.05E+01 | 7.85E−10 | 19.01 |
| 860 | (27) | <i>Chaetoceros gracilis</i>      | 24.70 | 8.19E+00 | 6.21E+01 | 7.77E−09 | 19.01 |
| 861 | (27) | <i>Pavlova lutheri</i>           | 20.20 | 1.15E+01 | 6.90E+01 | 4.54E−09 | 19.01 |
| 862 | (27) | <i>Pavlova lutheri</i>           | 19.95 | 1.15E+01 | 6.90E+01 | 5.55E−09 | 19.01 |
| 863 | (27) | <i>Dunaliella tertiolecta</i>    | 17.46 | 4.86E+01 | 3.20E+02 | 1.39E−08 | 19.01 |
| 864 | (27) | <i>Phaeodactylum tricornutum</i> | 14.98 | 1.08E+01 | 8.72E+01 | 1.68E−09 | 19.01 |
| 865 | (27) | <i>Phaeodactylum tricornutum</i> | 14.96 | 1.08E+01 | 8.72E+01 | 1.43E−09 | 19.01 |
| 866 | (27) | <i>Phaeodactylum tricornutum</i> | 10.13 | 1.33E+01 | 1.13E+02 | 1.43E−09 | 19.01 |
| 867 | (27) | <i>Thalassiosira pseudonana</i>  | 9.79  | 1.16E+01 | 9.50E+01 | 1.05E−09 | 19.01 |
| 868 | (27) | <i>Phaeodactylum tricornutum</i> | 14.97 | 1.08E+01 | 8.72E+01 | 1.56E−09 | 19.01 |

|     |      |                                  |       |          |          |          |       |
|-----|------|----------------------------------|-------|----------|----------|----------|-------|
| 869 | (27) | <i>Phaeodactylum tricornutum</i> | 15.07 | 1.08E+01 | 8.72E+01 | 3.33E−09 | 19.01 |
| 870 | (27) | <i>Thalassiosira pseudonana</i>  | 14.90 | 9.76E+00 | 7.71E+01 | 1.36E−09 | 19.01 |
| 871 | (27) | <i>Chaetoceros gracilis</i>      | 17.30 | 9.74E+00 | 7.69E+01 | 6.27E−09 | 19.01 |
| 872 | (27) | <i>Chaetoceros gracilis</i>      | 19.82 | 9.74E+00 | 7.69E+01 | 4.95E−09 | 19.01 |
| 873 | (27) | <i>Phaeodactylum tricornutum</i> | 10.12 | 1.33E+01 | 1.13E+02 | 1.30E−09 | 19.01 |
| 874 | (27) | <i>Thalassiosira pseudonana</i>  | 9.79  | 1.16E+01 | 9.50E+01 | 1.20E−09 | 19.01 |
| 875 | (27) | <i>Chaetoceros gracilis</i>      | 24.68 | 8.19E+00 | 6.21E+01 | 6.48E−09 | 19.01 |
| 876 | (27) | <i>Phaeodactylum tricornutum</i> | 20.15 | 1.11E+01 | 9.04E+01 | 3.02E−09 | 19.01 |
| 877 | (27) | <i>Phaeodactylum tricornutum</i> | 25.31 | 1.53E+01 | 1.35E+02 | 6.76E−09 | 19.01 |
| 878 | (27) | <i>Chaetoceros gracilis</i>      | 9.75  | 1.05E+01 | 8.47E+01 | 4.32E−10 | 19.01 |
| 879 | (27) | <i>Phaeodactylum tricornutum</i> | 20.15 | 1.11E+01 | 9.04E+01 | 3.22E−09 | 19.01 |
| 880 | (27) | <i>Chaetoceros calcitrans</i>    | 10.00 | 6.62E+00 | 4.78E+01 | 5.59E−10 | 19.01 |
| 881 | (28) | <i>Thalassiosira pseudonana</i>  | 17.50 | 7.68E+00 | 5.74E+01 | 5.06E−10 | 0.60  |
| 882 | (28) | <i>Thalassiosira pseudonana</i>  | 17.50 | 1.63E+01 | 1.45E+02 | 1.12E−08 | 7.52  |
| 883 | (28) | <i>Thalassiosira pseudonana</i>  | 17.50 | 1.52E+01 | 1.34E+02 | 1.07E−08 | 17.11 |
| 884 | (28) | <i>Thalassiosira pseudonana</i>  | 17.50 | 1.50E+01 | 1.31E+02 | 1.06E−08 | 10.37 |
| 885 | (28) | <i>Thalassiosira pseudonana</i>  | 17.50 | 9.84E+00 | 7.79E+01 | 2.02E−09 | 1.38  |
| 886 | (28) | <i>Thalassiosira pseudonana</i>  | 17.50 | 8.40E+00 | 6.41E+01 | 9.23E−10 | 0.78  |
| 887 | (28) | <i>Thalassiosira pseudonana</i>  | 17.50 | 1.34E+01 | 1.14E+02 | 9.69E−09 | 5.27  |
| 888 | (28) | <i>Thalassiosira pseudonana</i>  | 17.50 | 6.36E+00 | 4.55E+01 | 2.14E−10 | 0.43  |
| 889 | (28) | <i>Thalassiosira pseudonana</i>  | 17.50 | 1.07E+01 | 8.62E+01 | 4.45E−09 | 2.51  |
| 890 | (28) | <i>Thalassiosira pseudonana</i>  | 17.50 | 1.27E+01 | 1.07E+02 | 7.45E−09 | 17.11 |
| 891 | (28) | <i>Thalassiosira pseudonana</i>  | 17.50 | 6.72E+00 | 4.87E+01 | 1.99E−10 | 0.43  |
| 892 | (28) | <i>Thalassiosira pseudonana</i>  | 17.50 | 9.24E+00 | 7.21E+01 | 6.09E−10 | 0.60  |
| 893 | (28) | <i>Thalassiosira pseudonana</i>  | 17.50 | 1.12E+01 | 9.10E+01 | 6.61E−09 | 5.27  |
| 894 | (28) | <i>Thalassiosira pseudonana</i>  | 17.50 | 9.84E+00 | 7.79E+01 | 9.58E−10 | 0.78  |
| 895 | (28) | <i>Thalassiosira pseudonana</i>  | 17.50 | 1.20E+01 | 9.95E+01 | 7.02E−09 | 10.37 |
| 896 | (28) | <i>Thalassiosira pseudonana</i>  | 17.50 | 1.15E+01 | 9.46E+01 | 6.28E−09 | 7.52  |
| 897 | (28) | <i>Thalassiosira pseudonana</i>  | 17.50 | 7.68E+00 | 5.74E+01 | 1.86E−09 | 1.38  |
| 898 | (28) | <i>Thalassiosira pseudonana</i>  | 17.50 | 1.08E+01 | 8.74E+01 | 4.39E−09 | 2.51  |

|     |      |                                |       |          |          |          |      |
|-----|------|--------------------------------|-------|----------|----------|----------|------|
| 899 | (29) | <i>Pelagomonas calceolata</i>  | 20.00 | 3.00E-01 | 1.42E+00 | 1.02E-11 | 0.39 |
| 900 | (29) | <i>Pelagomonas calceolata</i>  | 20.00 | 3.00E-01 | 1.42E+00 | 1.67E-11 | 1.39 |
| 901 | (29) | <i>Synechococcus</i> sp.       | 20.00 | 2.57E-01 | 9.56E-01 | 2.70E-12 | 0.19 |
| 902 | (29) | <i>Prasinomonas capsulatus</i> | 20.00 | 7.25E-01 | 3.63E+00 | 1.39E-11 | 0.84 |
| 903 | (29) | <i>Pelagomonas calceolata</i>  | 20.00 | 3.00E-01 | 1.42E+00 | 1.31E-11 | 1.22 |
| 904 | (29) | <i>Pelagomonas calceolata</i>  | 20.00 | 3.00E-01 | 1.42E+00 | 1.07E-11 | 0.22 |
| 905 | (29) | <i>Prasinomonas capsulatus</i> | 20.00 | 7.25E-01 | 3.63E+00 | 3.63E-11 | 1.85 |
| 906 | (29) | <i>Prasinomonas capsulatus</i> | 20.00 | 7.25E-01 | 3.63E+00 | 2.69E-11 | 5.38 |
| 907 | (29) | <i>Pelagomonas calceolata</i>  | 20.00 | 3.00E-01 | 1.42E+00 | 8.88E-12 | 0.22 |
| 908 | (29) | <i>Pelagomonas calceolata</i>  | 20.00 | 3.00E-01 | 1.42E+00 | 8.49E-12 | 0.51 |
| 909 | (29) | <i>Prasinomonas capsulatus</i> | 20.00 | 7.25E-01 | 3.63E+00 | 4.12E-12 | 0.15 |
| 910 | (29) | <i>Pelagomonas calceolata</i>  | 20.00 | 3.00E-01 | 1.42E+00 | 6.31E-12 | 0.62 |
| 911 | (29) | <i>Pelagomonas calceolata</i>  | 20.00 | 3.00E-01 | 1.42E+00 | 9.70E-12 | 0.30 |
| 912 | (29) | <i>Synechococcus</i> sp.       | 20.00 | 2.57E-01 | 9.56E-01 | 1.32E-11 | 2.79 |
| 913 | (29) | <i>Synechococcus</i> sp.       | 20.00 | 2.57E-01 | 9.56E-01 | 1.57E-11 | 1.60 |
| 914 | (29) | <i>Synechococcus</i> sp.       | 20.00 | 2.57E-01 | 9.56E-01 | 1.36E-11 | 1.77 |
| 915 | (29) | <i>Synechococcus</i> sp.       | 20.00 | 2.57E-01 | 9.56E-01 | 2.12E-12 | 0.20 |
| 916 | (29) | <i>Synechococcus</i> sp.       | 20.00 | 2.57E-01 | 9.56E-01 | 3.38E-12 | 0.22 |
| 917 | (29) | <i>Synechococcus</i> sp.       | 20.00 | 2.57E-01 | 9.56E-01 | 1.69E-11 | 3.01 |
| 918 | (29) | <i>Prasinomonas capsulatus</i> | 20.00 | 7.25E-01 | 3.63E+00 | 1.02E-11 | 0.38 |
| 919 | (29) | <i>Synechococcus</i> sp.       | 20.00 | 2.57E-01 | 9.56E-01 | 4.10E-12 | 0.50 |
| 920 | (29) | <i>Synechococcus</i> sp.       | 20.00 | 2.57E-01 | 9.56E-01 | 3.38E-12 | 0.22 |
| 921 | (29) | <i>Pelagomonas calceolata</i>  | 20.00 | 3.00E-01 | 1.42E+00 | 5.32E-12 | 0.63 |
| 922 | (29) | <i>Synechococcus</i> sp.       | 20.00 | 2.57E-01 | 9.56E-01 | 1.28E-12 | 0.34 |
| 923 | (29) | <i>Synechococcus</i> sp.       | 20.00 | 2.57E-01 | 9.56E-01 | 1.17E-11 | 1.71 |
| 924 | (29) | <i>Pelagomonas calceolata</i>  | 20.00 | 3.00E-01 | 1.42E+00 | 6.93E-12 | 0.25 |
| 925 | (29) | <i>Prasinomonas capsulatus</i> | 20.00 | 7.25E-01 | 3.63E+00 | 3.80E-11 | 6.04 |
| 926 | (29) | <i>Synechococcus</i> sp.       | 20.00 | 2.57E-01 | 9.56E-01 | 1.88E-11 | 2.93 |
| 927 | (29) | <i>Pelagomonas calceolata</i>  | 20.00 | 3.00E-01 | 1.42E+00 | 1.30E-11 | 1.37 |
| 928 | (29) | <i>Pelagomonas calceolata</i>  | 20.00 | 3.00E-01 | 1.42E+00 | 6.17E-12 | 0.31 |

|     |      |                         |       |          |          |          |      |
|-----|------|-------------------------|-------|----------|----------|----------|------|
| 929 | (29) | Pelagomonas calceolata  | 20.00 | 3.00E-01 | 1.42E+00 | 6.93E-12 | 0.39 |
| 930 | (29) | Synechococcus sp.       | 20.00 | 2.57E-01 | 9.56E-01 | 1.91E-11 | 4.43 |
| 931 | (29) | Pelagomonas calceolata  | 20.00 | 3.00E-01 | 1.42E+00 | 1.91E-11 | 3.69 |
| 932 | (29) | Synechococcus sp.       | 20.00 | 2.57E-01 | 9.56E-01 | 3.38E-12 | 0.22 |
| 933 | (29) | Synechococcus sp.       | 20.00 | 2.57E-01 | 9.56E-01 | 1.59E-11 | 1.25 |
| 934 | (29) | Pelagomonas calceolata  | 20.00 | 3.00E-01 | 1.42E+00 | 6.80E-12 | 0.13 |
| 935 | (29) | Pelagomonas calceolata  | 20.00 | 3.00E-01 | 1.42E+00 | 3.06E-12 | 0.25 |
| 936 | (29) | Pelagomonas calceolata  | 20.00 | 3.00E-01 | 1.42E+00 | 1.50E-11 | 2.03 |
| 937 | (29) | Prasinomonas capsulatus | 20.00 | 7.25E-01 | 3.63E+00 | 1.13E-11 | 0.09 |
| 938 | (29) | Prasinomonas capsulatus | 20.00 | 7.25E-01 | 3.63E+00 | 1.66E-11 | 0.27 |
| 939 | (29) | Pelagomonas calceolata  | 20.00 | 3.00E-01 | 1.42E+00 | 5.67E-12 | 0.11 |
| 940 | (29) | Synechococcus sp.       | 20.00 | 2.57E-01 | 9.56E-01 | 6.10E-12 | 0.56 |
| 941 | (29) | Prasinomonas capsulatus | 20.00 | 7.25E-01 | 3.63E+00 | 1.22E-11 | 0.12 |
| 942 | (29) | Prasinomonas capsulatus | 20.00 | 7.25E-01 | 3.63E+00 | 2.53E-11 | 0.44 |
| 943 | (29) | Prasinomonas capsulatus | 20.00 | 7.25E-01 | 3.63E+00 | 3.15E-11 | 1.22 |
| 944 | (29) | Prasinomonas capsulatus | 20.00 | 7.25E-01 | 3.63E+00 | 8.78E-12 | 1.32 |
| 945 | (29) | Pelagomonas calceolata  | 20.00 | 3.00E-01 | 1.42E+00 | 1.93E-11 | 2.22 |
| 946 | (29) | Prasinomonas capsulatus | 20.00 | 7.25E-01 | 3.63E+00 | 2.01E-11 | 0.67 |
| 947 | (29) | Pelagomonas calceolata  | 20.00 | 3.00E-01 | 1.42E+00 | 1.55E-11 | 3.23 |
| 948 | (29) | Synechococcus sp.       | 20.00 | 2.57E-01 | 9.56E-01 | 1.53E-11 | 2.56 |
| 949 | (29) | Pelagomonas calceolata  | 20.00 | 3.00E-01 | 1.42E+00 | 2.17E-11 | 2.05 |
| 950 | (29) | Prasinomonas capsulatus | 20.00 | 7.25E-01 | 3.63E+00 | 4.92E-12 | 0.20 |
| 951 | (29) | Prasinomonas capsulatus | 20.00 | 7.25E-01 | 3.63E+00 | 1.79E-11 | 0.35 |
| 952 | (29) | Prasinomonas capsulatus | 20.00 | 7.25E-01 | 3.63E+00 | 4.24E-11 | 2.34 |
| 953 | (29) | Pelagomonas calceolata  | 20.00 | 3.00E-01 | 1.42E+00 | 1.92E-11 | 2.42 |
| 954 | (29) | Prasinomonas capsulatus | 20.00 | 7.25E-01 | 3.63E+00 | 3.39E-11 | 5.32 |
| 955 | (29) | Pelagomonas calceolata  | 20.00 | 3.00E-01 | 1.42E+00 | 9.29E-12 | 0.30 |
| 956 | (29) | Prasinomonas capsulatus | 20.00 | 7.25E-01 | 3.63E+00 | 3.55E-11 | 1.97 |
| 957 | (29) | Prasinomonas capsulatus | 20.00 | 7.25E-01 | 3.63E+00 | 2.13E-11 | 0.13 |
| 958 | (29) | Prasinomonas capsulatus | 20.00 | 7.25E-01 | 3.63E+00 | 9.02E-12 | 0.32 |



|     |      |                          |       |          |          |          |      |
|-----|------|--------------------------|-------|----------|----------|----------|------|
| 959 | (29) | Prasinomonas capsulatus  | 20.00 | 7.25E-01 | 3.63E+00 | 3.89E-11 | 2.49 |
| 960 | (29) | Prasinomonas capsulatus  | 20.00 | 7.25E-01 | 3.63E+00 | 1.95E-11 | 2.71 |
| 961 | (30) | Leptocylindricus danicus | 10.00 | 7.53E+01 | 1.16E+03 | 6.17E-09 | 1.74 |
| 962 | (30) | Leptocylindricus danicus | 5.00  | 7.41E+01 | 1.16E+03 | 1.85E-09 | 1.28 |
| 963 | (30) | Leptocylindricus danicus | 10.00 | 7.53E+01 | 1.16E+03 | 7.65E-09 | 2.55 |
| 964 | (30) | Leptocylindricus danicus | 5.00  | 7.41E+01 | 1.16E+03 | 1.88E-09 | 1.59 |
| 965 | (30) | Leptocylindricus danicus | 5.00  | 7.41E+01 | 1.16E+03 | 5.35E-10 | 0.55 |
| 966 | (30) | Leptocylindricus danicus | 15.00 | 9.26E+01 | 1.16E+03 | 3.76E-09 | 0.23 |
| 967 | (30) | Leptocylindricus danicus | 10.00 | 7.53E+01 | 1.16E+03 | 3.81E-09 | 1.39 |
| 968 | (30) | Leptocylindricus danicus | 5.00  | 7.41E+01 | 1.16E+03 | 2.59E-10 | 0.20 |
| 969 | (30) | Leptocylindricus danicus | 20.00 | 1.32E+02 | 1.16E+03 | 7.26E-08 | 4.12 |
| 970 | (30) | Leptocylindricus danicus | 5.00  | 7.41E+01 | 1.16E+03 | 1.63E-09 | 2.56 |
| 971 | (30) | Leptocylindricus danicus | 5.00  | 7.41E+01 | 1.16E+03 | 6.77E-10 | 0.30 |
| 972 | (30) | Leptocylindricus danicus | 5.00  | 7.41E+01 | 1.16E+03 | 1.86E-09 | 2.33 |
| 973 | (30) | Leptocylindricus danicus | 5.00  | 7.41E+01 | 1.16E+03 | 1.18E-09 | 1.24 |
| 974 | (30) | Leptocylindricus danicus | 15.00 | 9.26E+01 | 1.16E+03 | 2.88E-08 | 1.82 |
| 975 | (30) | Leptocylindricus danicus | 15.00 | 9.26E+01 | 1.16E+03 | 4.70E-08 | 3.95 |
| 976 | (30) | Leptocylindricus danicus | 20.00 | 1.32E+02 | 1.16E+03 | 1.01E-08 | 0.35 |
| 977 | (30) | Leptocylindricus danicus | 20.00 | 1.32E+02 | 1.16E+03 | 3.15E-08 | 1.38 |
| 978 | (30) | Leptocylindricus danicus | 15.00 | 9.26E+01 | 1.16E+03 | 4.90E-08 | 3.07 |
| 979 | (30) | Leptocylindricus danicus | 15.00 | 9.26E+01 | 1.16E+03 | 1.97E-08 | 1.20 |
| 980 | (30) | Leptocylindricus danicus | 15.00 | 9.26E+01 | 1.16E+03 | 5.79E-08 | 6.10 |
| 981 | (30) | Leptocylindricus danicus | 20.00 | 1.32E+02 | 1.16E+03 | 5.08E-08 | 2.35 |
| 982 | (30) | Leptocylindricus danicus | 20.00 | 1.32E+02 | 1.16E+03 | 4.57E-09 | 0.18 |
| 983 | (30) | Leptocylindricus danicus | 20.00 | 1.32E+02 | 1.16E+03 | 1.66E-08 | 0.55 |
| 984 | (30) | Leptocylindricus danicus | 20.00 | 1.32E+02 | 1.16E+03 | 6.90E-08 | 4.82 |
| 985 | (30) | Leptocylindricus danicus | 20.00 | 1.32E+02 | 1.16E+03 | 7.27E-08 | 3.14 |
| 986 | (30) | Leptocylindricus danicus | 20.00 | 1.32E+02 | 1.16E+03 | 4.88E-08 | 1.77 |
| 987 | (30) | Leptocylindricus danicus | 20.00 | 1.32E+02 | 1.16E+03 | 7.61E-08 | 6.46 |
| 988 | (30) | Leptocylindricus danicus | 10.00 | 7.53E+01 | 1.16E+03 | 1.52E-09 | 0.20 |

|      |      |                          |       |          |          |          |      |
|------|------|--------------------------|-------|----------|----------|----------|------|
| 989  | (30) | Leptocylindricus danicus | 10.00 | 7.53E+01 | 1.16E+03 | 7.90E−09 | 4.03 |
| 990  | (30) | Leptocylindricus danicus | 15.00 | 9.26E+01 | 1.16E+03 | 3.02E−08 | 1.89 |
| 991  | (30) | Leptocylindricus danicus | 10.00 | 7.53E+01 | 1.16E+03 | 1.92E−09 | 0.37 |
| 992  | (30) | Leptocylindricus danicus | 10.00 | 7.53E+01 | 1.16E+03 | 5.78E−09 | 1.43 |
| 993  | (30) | Leptocylindricus danicus | 10.00 | 7.53E+01 | 1.16E+03 | 5.13E−09 | 0.99 |
| 994  | (30) | Leptocylindricus danicus | 15.00 | 9.26E+01 | 1.16E+03 | 1.24E−08 | 0.69 |
| 995  | (30) | Leptocylindricus danicus | 15.00 | 9.26E+01 | 1.16E+03 | 5.31E−09 | 0.26 |
| 996  | (30) | Leptocylindricus danicus | 10.00 | 7.53E+01 | 1.16E+03 | 1.52E−09 | 0.58 |
| 997  | (30) | Leptocylindricus danicus | 10.00 | 7.53E+01 | 1.16E+03 | 7.02E−09 | 2.71 |
| 998  | (30) | Leptocylindricus danicus | 15.00 | 9.26E+01 | 1.16E+03 | 5.25E−08 | 4.85 |
| 999  | (30) | Leptocylindricus danicus | 20.00 | 1.32E+02 | 1.16E+03 | 1.49E−08 | 0.26 |
| 1000 | (30) | Leptocylindricus danicus | 20.00 | 1.32E+02 | 1.16E+03 | 1.54E−08 | 0.53 |
| 1001 | (30) | Leptocylindricus danicus | 5.00  | 7.41E+01 | 1.16E+03 | 1.78E−09 | 3.60 |
| 1002 | (30) | Leptocylindricus danicus | 5.00  | 7.41E+01 | 1.16E+03 | 1.41E−09 | 0.78 |
| 1003 | (30) | Leptocylindricus danicus | 15.00 | 9.26E+01 | 1.16E+03 | 2.61E−08 | 2.19 |
| 1004 | (30) | Leptocylindricus danicus | 10.00 | 7.53E+01 | 1.16E+03 | 3.23E−09 | 0.52 |
| 1005 | (30) | Leptocylindricus danicus | 5.00  | 7.41E+01 | 1.16E+03 | 1.54E−09 | 0.94 |
| 1006 | (30) | Leptocylindricus danicus | 5.00  | 7.41E+01 | 1.16E+03 | 1.10E−09 | 0.45 |
| 1007 | (30) | Leptocylindricus danicus | 10.00 | 7.53E+01 | 1.16E+03 | 4.01E−09 | 0.90 |
| 1008 | (30) | Leptocylindricus danicus | 15.00 | 9.26E+01 | 1.16E+03 | 1.40E−08 | 0.65 |
| 1009 | (30) | Leptocylindricus danicus | 20.00 | 1.32E+02 | 1.16E+03 | 3.38E−08 | 0.86 |
| 1010 | (30) | Leptocylindricus danicus | 15.00 | 9.26E+01 | 1.16E+03 | 7.34E−09 | 0.40 |
| 1011 | (30) | Leptocylindricus danicus | 15.00 | 9.26E+01 | 1.16E+03 | 2.47E−08 | 1.76 |
| 1012 | (31) | Skeletonema costatum     | 5.00  | 3.49E+01 | 3.71E+02 | 1.61E−09 | 0.30 |
| 1013 | (31) | Skeletonema costatum     | 16.00 | 2.82E+01 | 2.86E+02 | 5.34E−09 | 0.77 |
| 1014 | (31) | Skeletonema costatum     | 5.00  | 4.27E+01 | 4.76E+02 | 3.99E−09 | 3.65 |
| 1015 | (31) | Skeletonema costatum     | 5.00  | 4.29E+01 | 4.78E+02 | 6.25E−10 | 0.14 |
| 1016 | (31) | Skeletonema costatum     | 16.00 | 2.50E+01 | 2.45E+02 | 8.49E−10 | 0.14 |
| 1017 | (31) | Skeletonema costatum     | 0.00  | 5.56E+01 | 6.59E+02 | 2.25E−09 | 1.54 |
| 1018 | (31) | Skeletonema costatum     | 0.00  | 3.41E+01 | 3.60E+02 | 3.92E−10 | 0.18 |

|      |      |                      |       |          |          |          |      |
|------|------|----------------------|-------|----------|----------|----------|------|
| 1019 | (31) | Skeletonema costatum | 16.00 | 2.82E+01 | 2.86E+02 | 2.57E−09 | 0.38 |
| 1020 | (31) | Skeletonema costatum | 16.00 | 2.82E+01 | 2.86E+02 | 5.09E−09 | 0.65 |
| 1021 | (31) | Skeletonema costatum | 5.00  | 2.39E+01 | 2.33E+02 | 2.28E−09 | 0.96 |
| 1022 | (31) | Skeletonema costatum | 22.00 | 3.67E+01 | 3.95E+02 | 4.42E−08 | 1.53 |
| 1023 | (31) | Skeletonema costatum | 16.00 | 4.56E+01 | 5.17E+02 | 2.31E−08 | 2.89 |
| 1024 | (31) | Skeletonema costatum | 5.00  | 3.45E+01 | 3.66E+02 | 3.16E−09 | 1.50 |
| 1025 | (31) | Skeletonema costatum | 16.00 | 4.56E+01 | 5.17E+02 | 3.63E−08 | 6.18 |
| 1026 | (31) | Skeletonema costatum | 0.00  | 4.61E+01 | 5.24E+02 | 1.71E−09 | 0.87 |
| 1027 | (31) | Skeletonema costatum | 0.00  | 5.56E+01 | 6.59E+02 | 1.90E−09 | 2.78 |
| 1028 | (31) | Skeletonema costatum | 16.00 | 4.56E+01 | 5.17E+02 | 1.63E−08 | 2.34 |
| 1029 | (31) | Skeletonema costatum | 16.00 | 4.56E+01 | 5.17E+02 | 3.00E−08 | 3.03 |
| 1030 | (31) | Skeletonema costatum | 16.00 | 4.56E+01 | 5.17E+02 | 4.43E−08 | 4.60 |
| 1031 | (31) | Skeletonema costatum | 16.00 | 4.56E+01 | 5.17E+02 | 2.49E−08 | 3.80 |
| 1032 | (31) | Skeletonema costatum | 5.00  | 2.50E+01 | 2.46E+02 | 1.59E−09 | 0.49 |
| 1033 | (31) | Skeletonema costatum | 5.00  | 2.39E+01 | 2.33E+02 | 2.03E−09 | 0.86 |
| 1034 | (31) | Skeletonema costatum | 22.00 | 4.20E+01 | 4.67E+02 | 1.81E−08 | 1.56 |
| 1035 | (31) | Skeletonema costatum | 0.00  | 4.61E+01 | 5.24E+02 | 1.85E−09 | 0.50 |
| 1036 | (31) | Skeletonema costatum | 5.00  | 2.05E+01 | 1.92E+02 | 3.62E−10 | 0.13 |
| 1037 | (31) | Skeletonema costatum | 5.00  | 2.50E+01 | 2.46E+02 | 2.00E−09 | 0.49 |
| 1038 | (31) | Skeletonema costatum | 22.00 | 3.67E+01 | 3.95E+02 | 3.09E−08 | 3.01 |
| 1039 | (31) | Skeletonema costatum | 0.00  | 5.56E+01 | 6.59E+02 | 2.20E−09 | 1.00 |
| 1040 | (31) | Skeletonema costatum | 22.00 | 3.49E+01 | 3.71E+02 | 7.12E−09 | 0.78 |
| 1041 | (31) | Skeletonema costatum | 22.00 | 3.49E+01 | 3.71E+02 | 2.82E−09 | 0.36 |
| 1042 | (31) | Skeletonema costatum | 0.00  | 2.41E+01 | 2.35E+02 | 8.90E−10 | 0.22 |
| 1043 | (31) | Skeletonema costatum | 22.00 | 4.18E+01 | 4.64E+02 | 3.26E−08 | 4.74 |
| 1044 | (31) | Skeletonema costatum | 0.00  | 5.56E+01 | 6.59E+02 | 2.21E−09 | 1.85 |
| 1045 | (31) | Skeletonema costatum | 16.00 | 2.82E+01 | 2.86E+02 | 6.85E−09 | 1.05 |
| 1046 | (31) | Skeletonema costatum | 10.00 | 3.19E+01 | 3.33E+02 | 6.76E−09 | 3.19 |
| 1047 | (31) | Skeletonema costatum | 10.00 | 3.10E+01 | 3.21E+02 | 3.63E−09 | 1.31 |
| 1048 | (31) | Skeletonema costatum | 5.00  | 3.45E+01 | 3.66E+02 | 3.23E−09 | 2.30 |

|      |      |                      |       |          |          |          |      |
|------|------|----------------------|-------|----------|----------|----------|------|
| 1049 | (31) | Skeletonema costatum | 10.00 | 3.10E+01 | 3.21E+02 | 5.31E−09 | 2.24 |
| 1050 | (31) | Skeletonema costatum | 22.00 | 4.20E+01 | 4.67E+02 | 1.50E−08 | 0.73 |
| 1051 | (31) | Skeletonema costatum | 10.00 | 2.49E+01 | 2.44E+02 | 2.21E−09 | 0.70 |
| 1052 | (31) | Skeletonema costatum | 10.00 | 2.49E+01 | 2.44E+02 | 7.40E−10 | 0.35 |
| 1053 | (31) | Skeletonema costatum | 10.00 | 2.49E+01 | 2.44E+02 | 3.03E−09 | 1.14 |
| 1054 | (31) | Skeletonema costatum | 16.00 | 4.56E+01 | 5.17E+02 | 1.44E−08 | 1.50 |
| 1055 | (31) | Skeletonema costatum | 16.00 | 2.50E+01 | 2.45E+02 | 1.31E−09 | 0.21 |
| 1056 | (31) | Skeletonema costatum | 10.00 | 3.19E+01 | 3.33E+02 | 4.36E−09 | 1.94 |
| 1057 | (31) | Skeletonema costatum | 10.00 | 1.90E+01 | 1.76E+02 | 1.51E−10 | 0.16 |
| 1058 | (31) | Skeletonema costatum | 22.00 | 4.18E+01 | 4.64E+02 | 5.45E−08 | 3.98 |
| 1059 | (31) | Skeletonema costatum | 16.00 | 3.20E+01 | 3.33E+02 | 1.11E−08 | 1.63 |
| 1060 | (31) | Skeletonema costatum | 22.00 | 4.18E+01 | 4.64E+02 | 5.00E−08 | 2.84 |
| 1061 | (31) | Skeletonema costatum | 10.00 | 1.90E+01 | 1.76E+02 | 3.13E−10 | 0.09 |
| 1062 | (31) | Skeletonema costatum | 10.00 | 2.49E+01 | 2.44E+02 | 1.47E−09 | 0.58 |
| 1063 | (31) | Skeletonema costatum | 0.00  | 2.41E+01 | 2.35E+02 | 9.47E−11 | 0.12 |

Data were extracted from tables or digitized from figures reported in the original papers (Ref). Columns show the temperature in degrees celsius (Temp), body size in picograms of carbon (Carbon), body volume in  $\mu\text{m}^3$  (Vol), production in  $\text{mmol of O}_2 \cdot \text{d}^{-1}$  (Prod) and PAR in  $\text{mol of photons} \cdot \text{m}^{-2} \cdot \text{d}^{-1}$ . When phytoplankton body mass was expressed as cell volume, it was converted to carbon units by using the appropriate relationship (32). In Fig. 5C, we used as a measure of body size the biovolume reported in the original studies [in order to avoid possible artifacts of carbon to volume conversion equations (33 and 34)]. In a few occasions where neither body volume or mass were reported, we used the body carbon for the same species as reported in one of the other sources compiled. Biomass production was calculated from the daily specific growth rate ( $\mu, \text{d}^{-1}$ ) by using the equation:  $P_i = \text{Base}^\mu * M_i - M_i$ , where *Base* is the logarithmic base used in the original work (usually 2 or 10). Biomass production was then converted to oxygen production by using a photosynthetic quotient of 1.25 (35 and 36).

## References

1. Adolf, J. E., Stoecker, D. K. & Harding, L. W. (2003) *J. Phycol.* **39**, 1101–1108.
2. Blasco, D., Packard, T. T. & Garfield, P. C. (1982) *J. Phycol.* **18**, 58–63.
3. Chan, A. T. (1978) *J. Phycol.* **14**, 396–402.
4. Cospér, E. (1982) *J. Plankton Res.* **4**, 705–724.
5. Daneri, G., Iriarte, A., Garcia, V. M., Purdie, D. A. & Crawford, D. W. (1992) *J. Mar. Biol. Assoc. U.K.* **72**, 723–726.
6. Eppley, R. W. & Sloan, P. R. (1965) *J. Fish. Res. Board Can.* **22**, 1083–&.
7. Fawley, M. W. (1984) *J. Phycol.* **20**, 67–72.
8. Finkel, Z. V. (2001) *Limnol. Oceanogr.* **46**, 86–94.
9. Garcia, V. M. T. & Purdie, D. A. (1992) *J. Plankton Res.* **14**, 1251–1265.
10. Geider, R. J., Osborne, B. A. & Raven, J. A. (1985) *J. Phycol.* **21**, 609–619.
11. Henley, W. J. & Yin, Y. (1998) *J. Phycol.* **34**, 94–103.
12. Hobson, L. A., Hartley, F. A. & Ketcham, D. E. (1979) *Plant Phys.* **63**, 947–951.
13. Ignatiades, L. & Smayda, T. J. (1970) *J. Phycol.* **6**, 332–339.
14. Iriarte, A. & Purdie, D. A. (1993) *J. Exp. Mar. Biol. Ecol.* **168**, 239–257.
15. Jorgense, E. G. (1968) *Physiologia plantarum* **21**, 423–&.
16. Krawiec, R. W. (1982) *Mar. Biol.* **69**, 79–89.

17. Kusk, K. O. (1981) *Bot. Mar.* **24**, 413–418.
18. Langdon, C. (1987) *J. Plankton Res.* **9**, 459–482.
19. Laws, E. A. & Bannister, T. T. (1980) *Limnol. Oceanogr.* **25**, 457–473.
20. Li, W. K. W. & Morris, I. (1982) *J. Exp. Mar. Biol. Ecol.* **58**, 135–150.
21. Lundholm, N., Skov, J., Pocklington, R. & Moestrup, Ø. (1997) *Phycologia* **36**, 381–388.
22. Miller, R. L. & Kamykowski, D. L. (1986) *J. Plankton Res.* **8**, 215–228.
23. Montagnes, D. J. S. & Franklin, D. J. (2001) *Limnol. Oceanogr.* **46**, 2008–2018.
24. Moore, L. R. & Chisholm, S. W. (1999) *Limnol. Oceanogr.* **44**, 628–638.
25. Parsons, T. R., K., S. & H., S. J. D. (1961) *J. Fish. Res. Board Can.* **18**, 1001–1016.
26. Suzuki, Y. & Takahashi, M. (1995) *J. Phycol.* **31**, 880–888.
27. Thompson, P. A., Guo, M. X. & Harrison, P. J. (1992) *J. Phycol.* **28**, 481–488.
28. Thompson, P. A., Levasseur, M. E. & Harrison, P. J. (1989) *Limnol. Oceanogr.* **34**, 1014–1024.
29. Timmermans, K. R., van der Wagt, B., Veldhuis, M. J. W., Maatman, A. & de Baar, H. J. W. (2005) *J. Sea Res.* **53**, 109–120.
30. Verity, P. G. (1982) *J. Exp. Mar. Biol. Ecol.* **60**, 209–222.
31. Yoder, J. A. (1979) *J. Phycol.* **15**, 362–370.
32. Menden-Deuer, S. & Lessard, E. J. (2000) *Limnol. Oceanogr.* **45**, 569–579.
33. Tang, E. P. Y. & Peters, R. H. (1995) *J. Plankton Res.* **17**, 303–315.

34. Tang, E. (1995) *J. Plankton Res.* **17**, 1325–1335.
35. Duarte, C. M. & Agustí, S. (1998) *Science* **281**, 234–236.
36. Robinson, C., Serret, P., Tilstone, G., Teira, E., Zubkov, M. V., Rees, A. P. & Woodward, E. M. S. (2002) *Deep-Sea Res.* **49**, 787–813.
