# Supplementary material
Source: PubMed Central journal article supplement (PMC1482648)

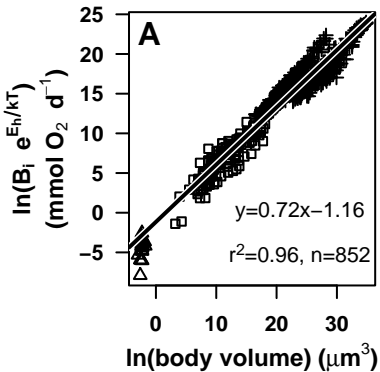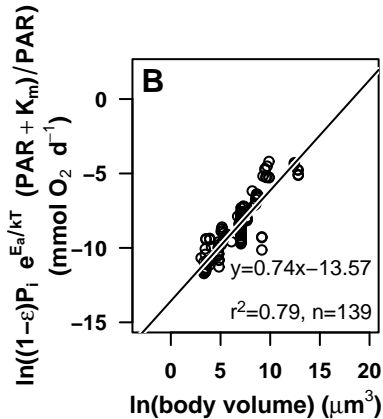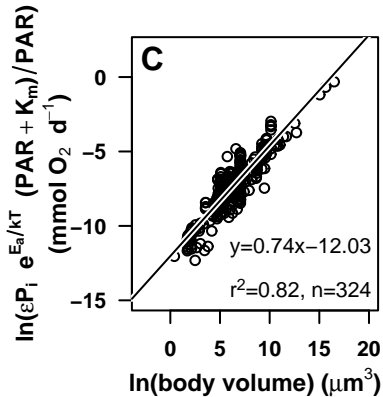

Supplement: pnas_0601137103_1.pdf [file pnas_0601137103_1.pdf]

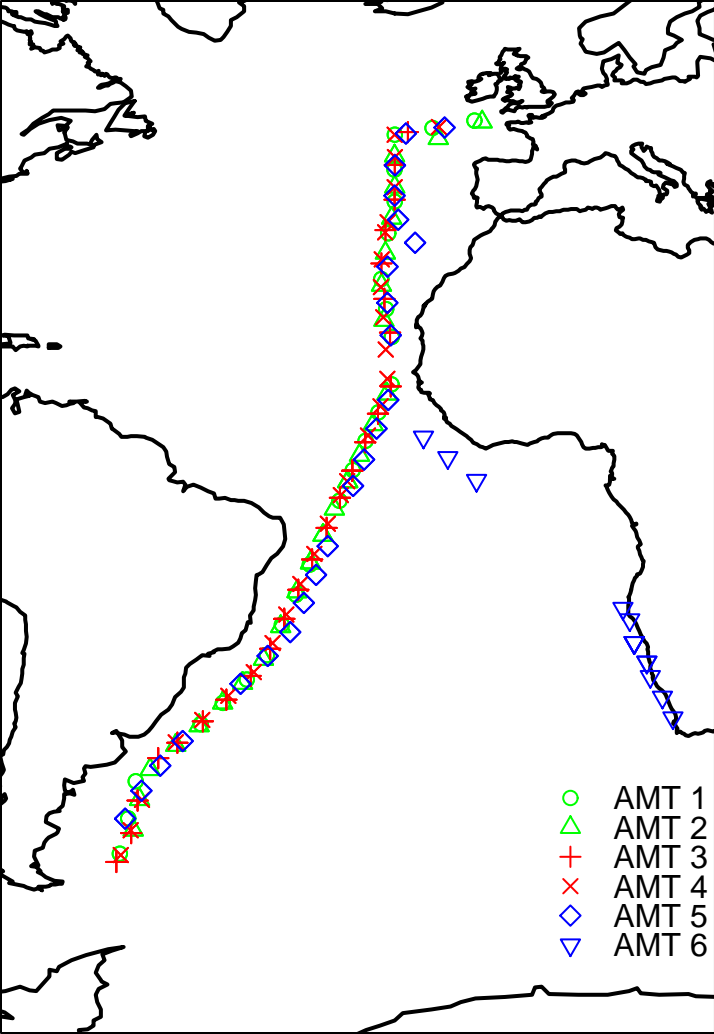

Supplement: pnas_0601137103_2.pdf [file pnas_0601137103_2.pdf]

Community respiration

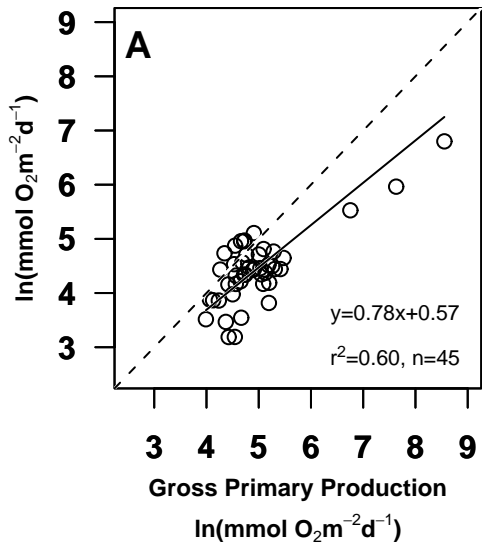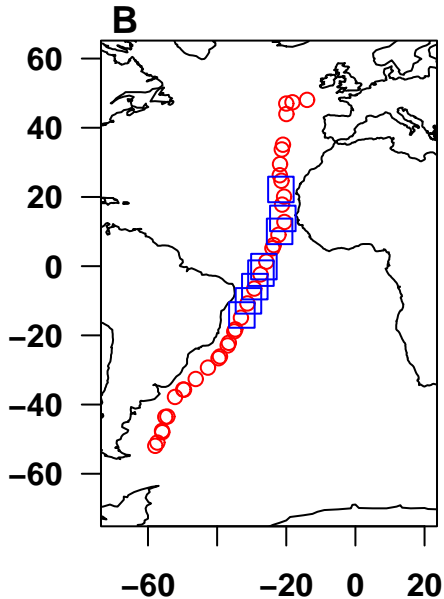

Supplement: pnas_0601137103_3.pdf [file pnas_0601137103_3.pdf]

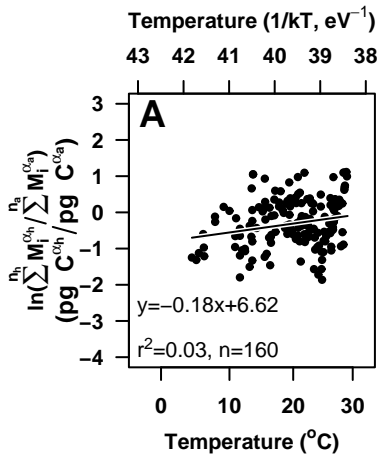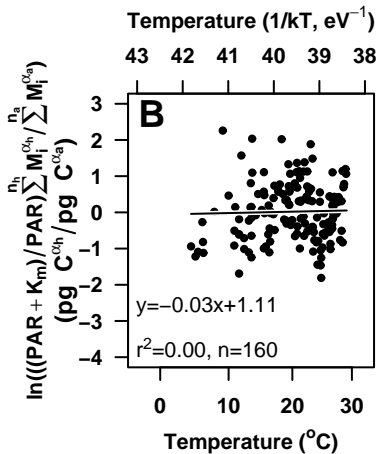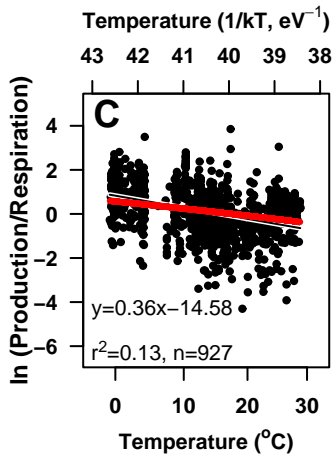

Supplement: pnas_0601137103_4.pdf [file pnas_0601137103_4.pdf]

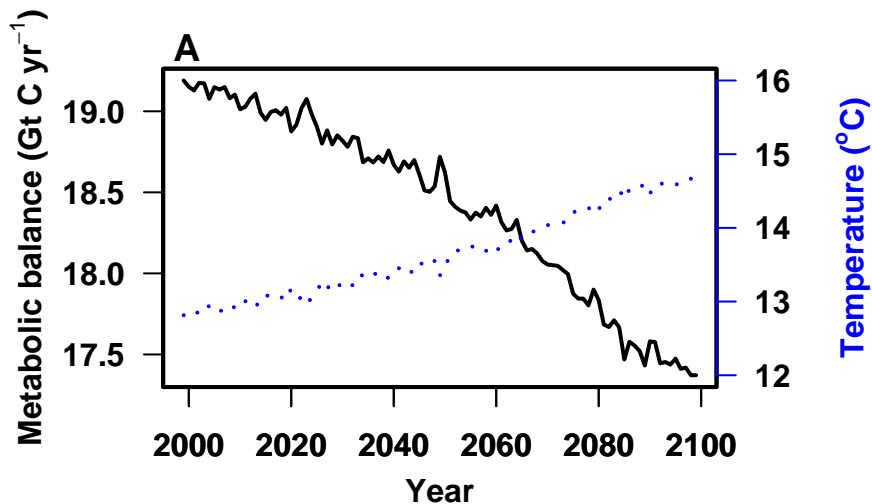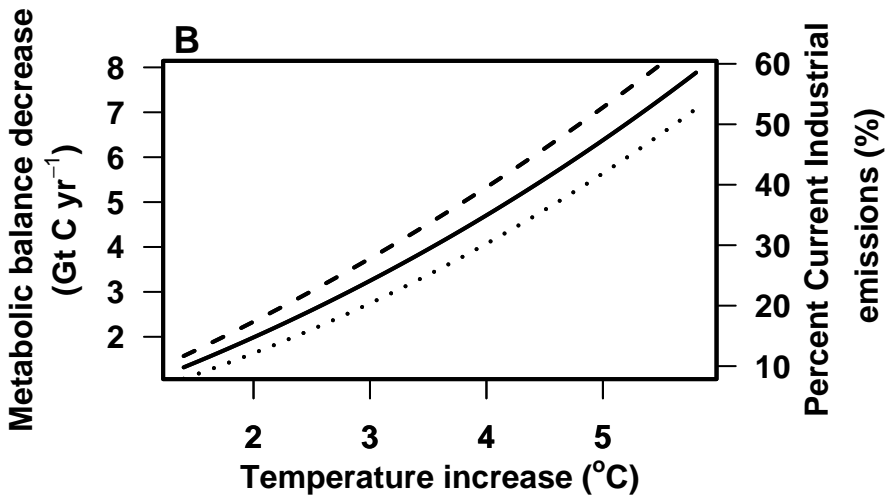

Supplement: pnas_0601137103_5.pdf [file pnas_0601137103_5.pdf]
